# Supplementary material for: Transcriptome Analysis Reveals Endogenous Hormone Changes during Spike Development in Phalaenopsis
Source: MDPI journal article supplement (doi:10.3390/ijms231810461), 2022-09-09
Supplement: s1 [file s1]

**Table S7 Primers for qRT-PCR analysis**

| <b>Gene ID</b> | <b>Symbol</b>  | <b>Forward primer (5'→3')</b> | <b>Reverse primer (5'→3')</b> | <b>Product (bp)</b> |
|----------------|----------------|-------------------------------|-------------------------------|---------------------|
| ncbi_110039291 | <i>FD</i>      | GCCCGAAAACAGGCATACAC          | TAAAATGGAGCGGTTGAGGT          | 161                 |
| ncbi_110037566 | <i>FRI</i>     | GGAAAATGGTGTTTCAGGCG          | CCAAACGCAGCAAGCACA            | 198                 |
| ncbi_110033833 | <i>SOC1</i>    | GCTGGAAGAGCAGGTAGTG           | ACAGAGATAAGGTTGTGTGAGG        | 101                 |
| ncbi_110038561 | <i>API</i>     | GATGAGGAGGAACGGGCAAG          | ACAGCCGAAGCAGACACAA           | 93                  |
| ncbi_110033382 | <i>SPK1</i>    | AAGAAGACAAAGCACCAGCA          | GGGCGTAAGAAGCAGGCA            | 192                 |
| ncbi_110026134 | <i>bHLH35</i>  | CAGCAGGAAGAGACACGCA           | CAAAGGCTCACGCCACTCAT          | 222                 |
| ncbi_110025156 | <i>GA20OX</i>  | GAGGTGTCTGGGTGATGGTT          | CCTTCTGCTGCTTGGCTTCC          | 370                 |
| ncbi_110030934 | <i>CYP707A</i> | TAATACCGAAGGGGTGGAAGG         | GAGGTGGTGGAGAAAGACGAG         | 206                 |
|                | <i>PACT4</i>   | AAACTGCCAAGACGACCTCA          | CCCTGCTGCTTCCATACCAA          | 137                 |
