# Supplementary figures and images for: Transcriptome Analysis Reveals Endogenous Hormone Changes during Spike Development in Phalaenopsis
Source: MDPI journal article supplement (doi:10.3390/ijms231810461), 2022-09-09

Figure S1 Peak plot of HPLC

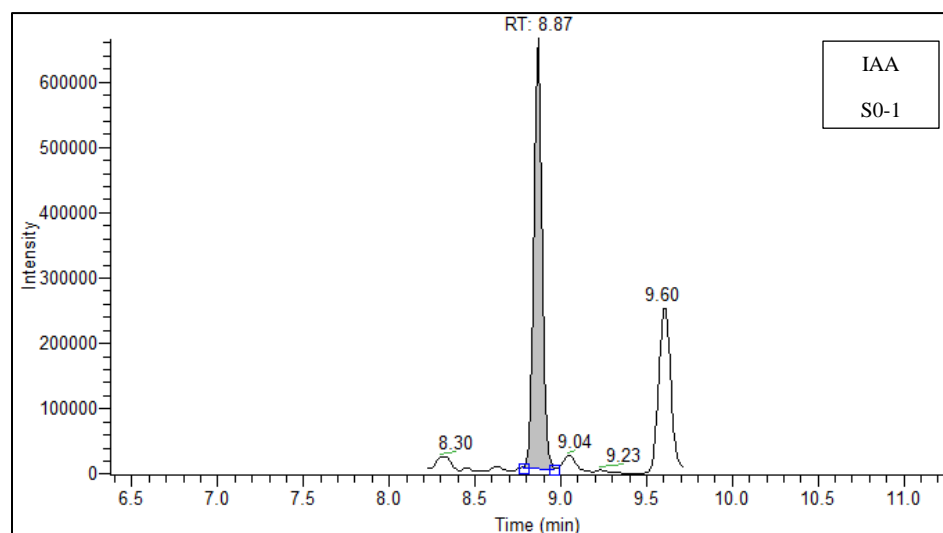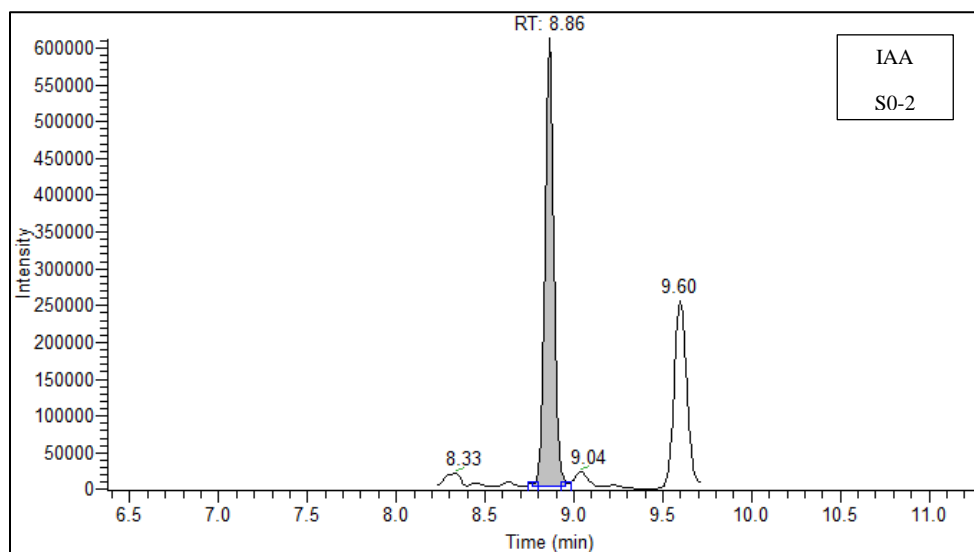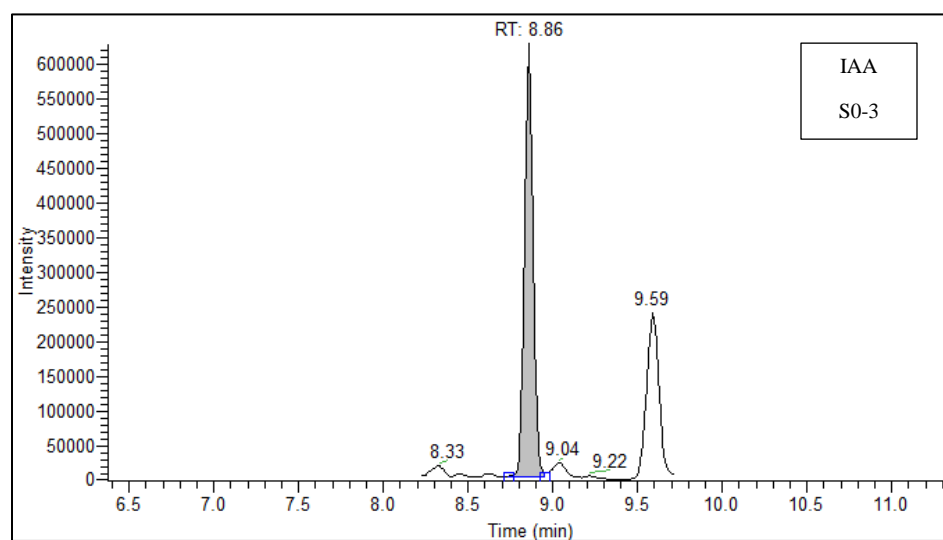

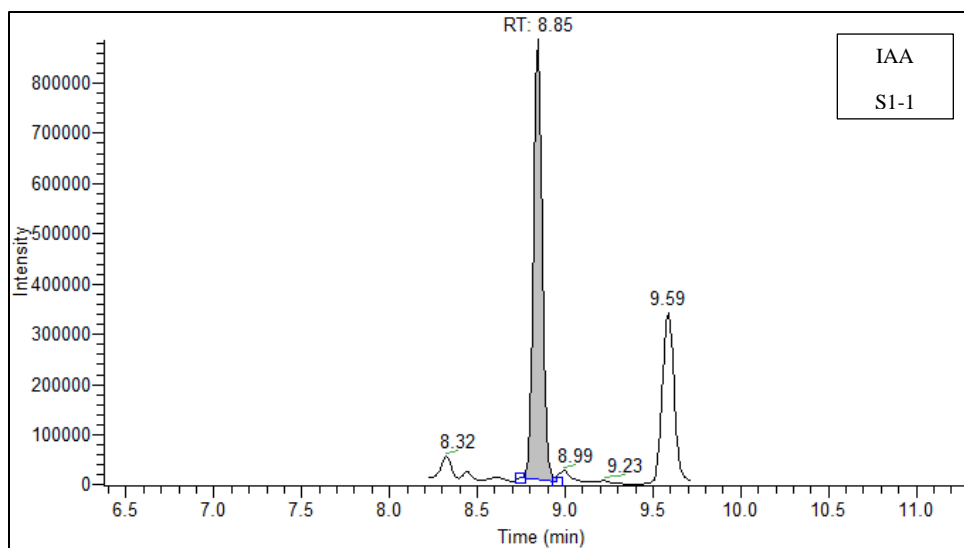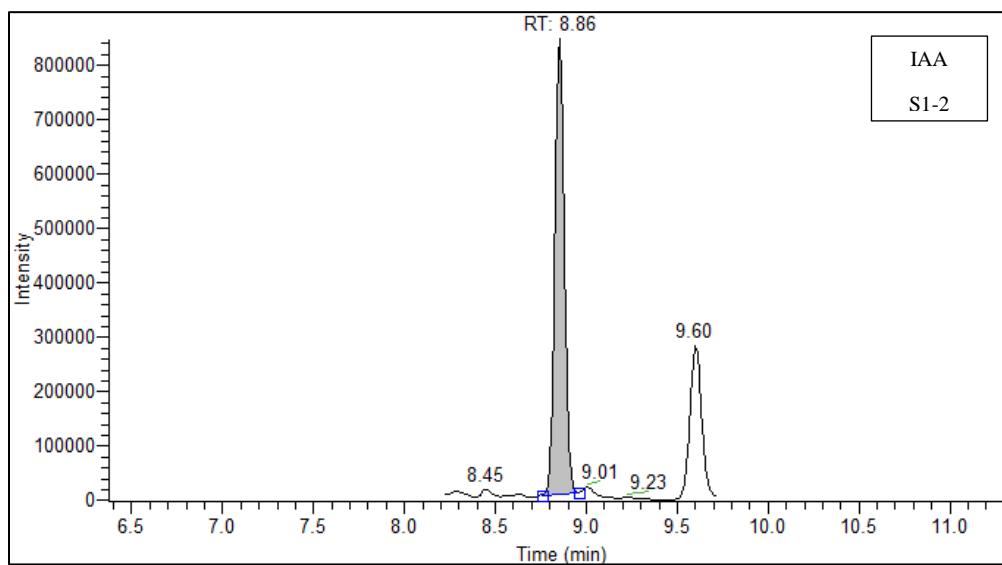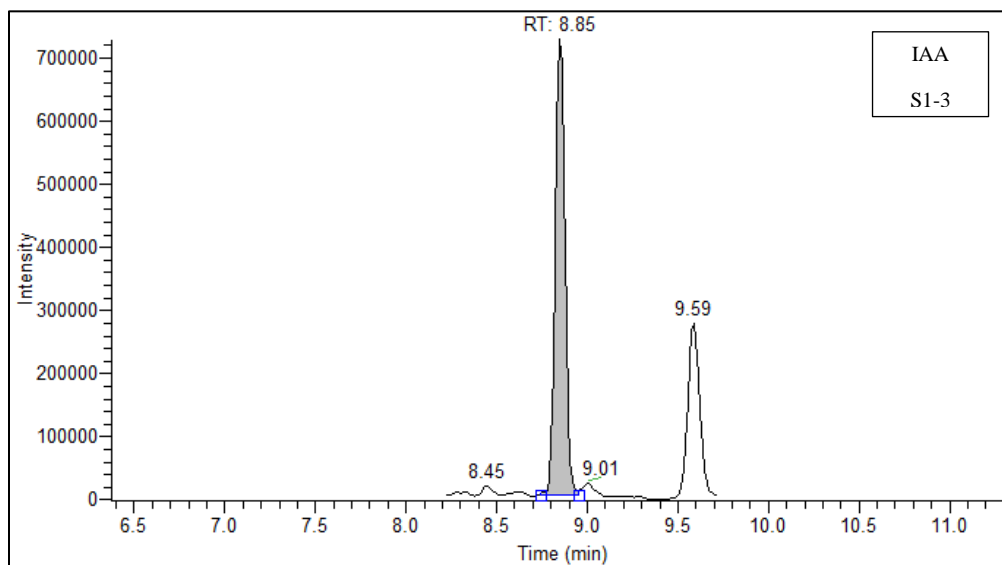

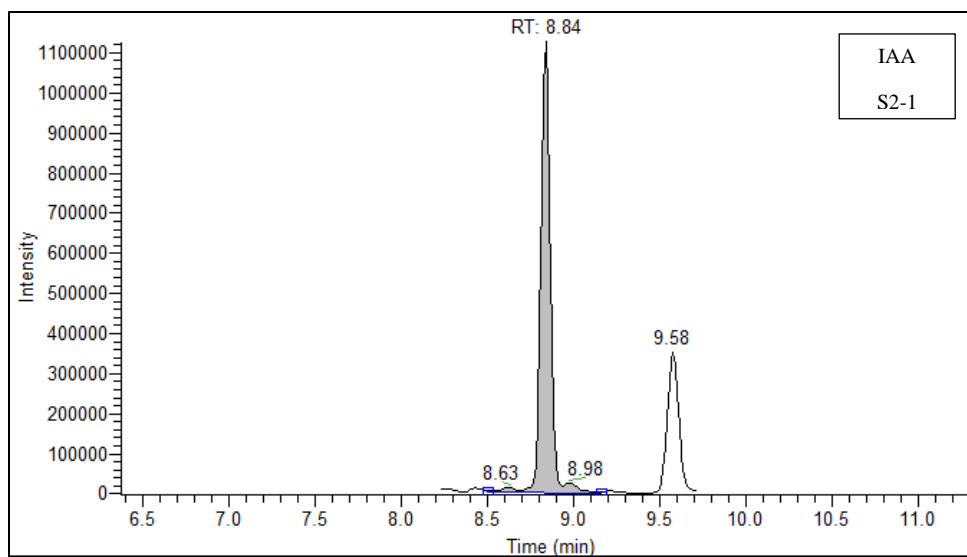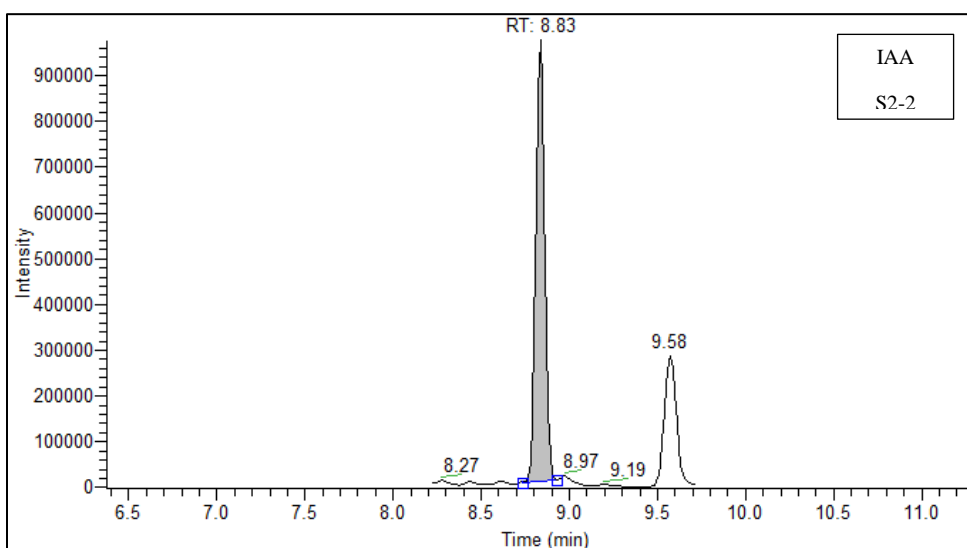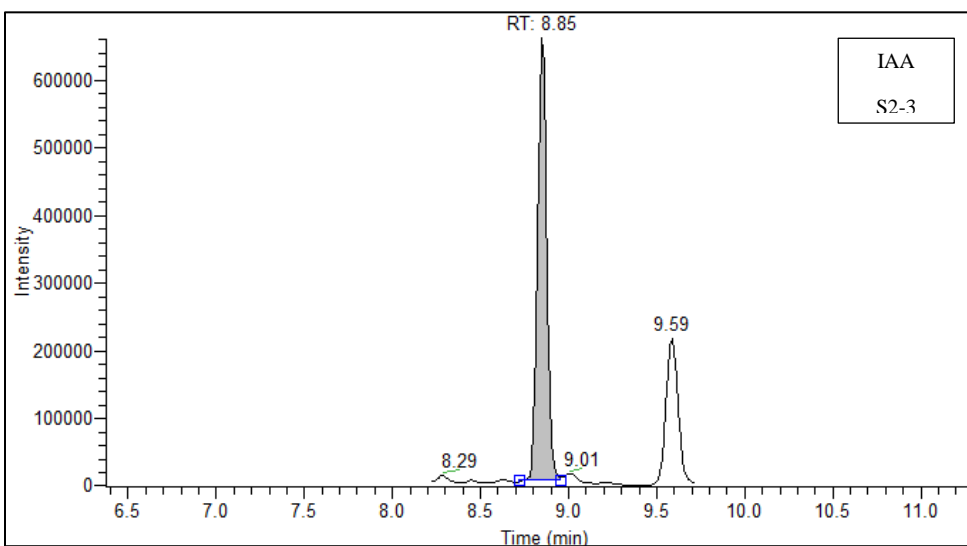

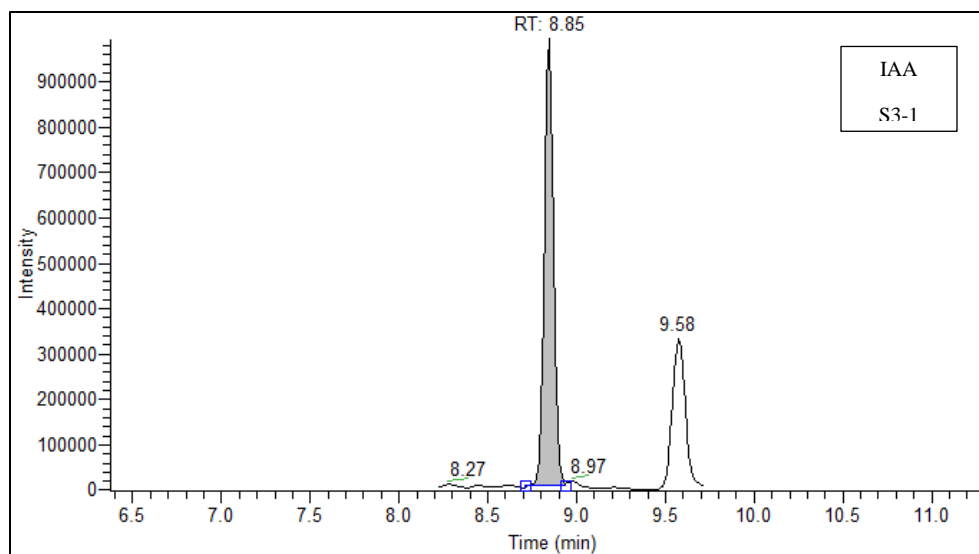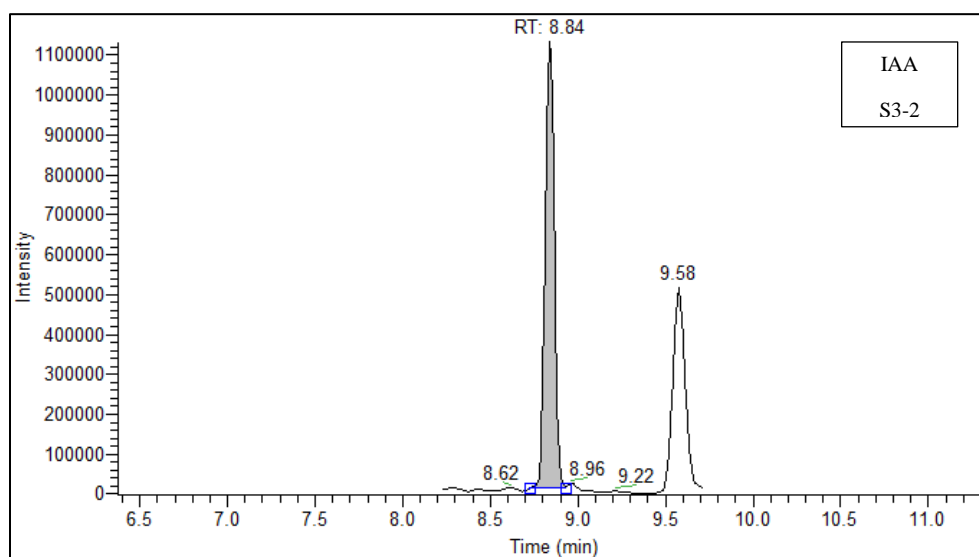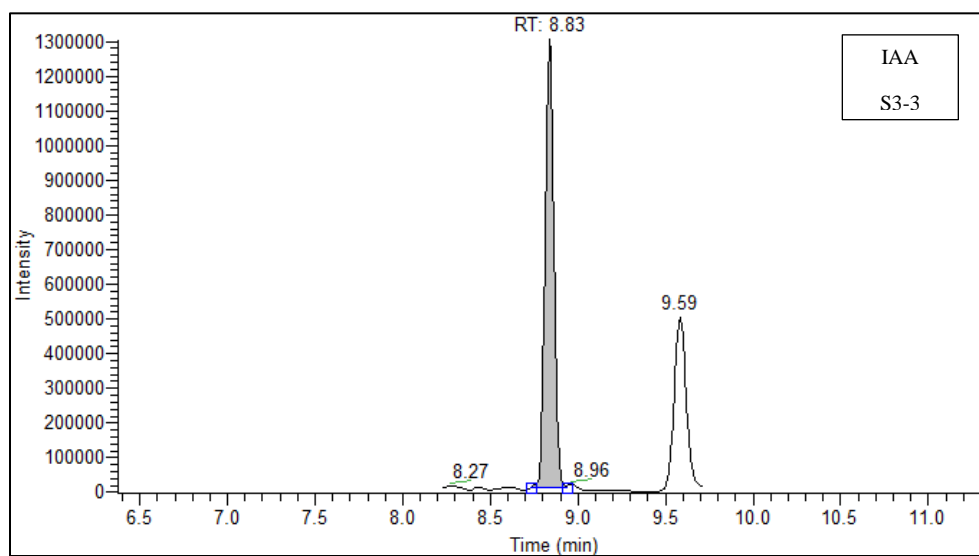

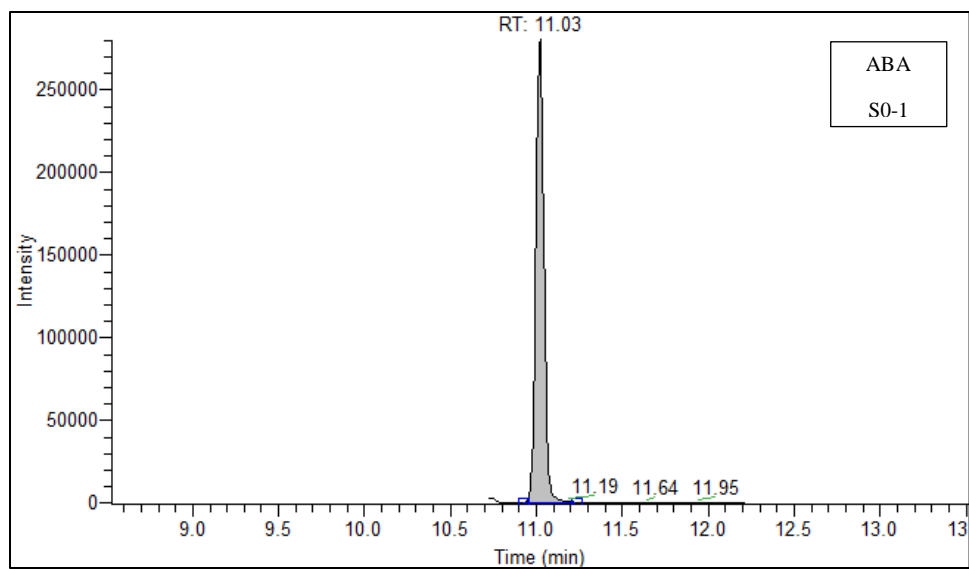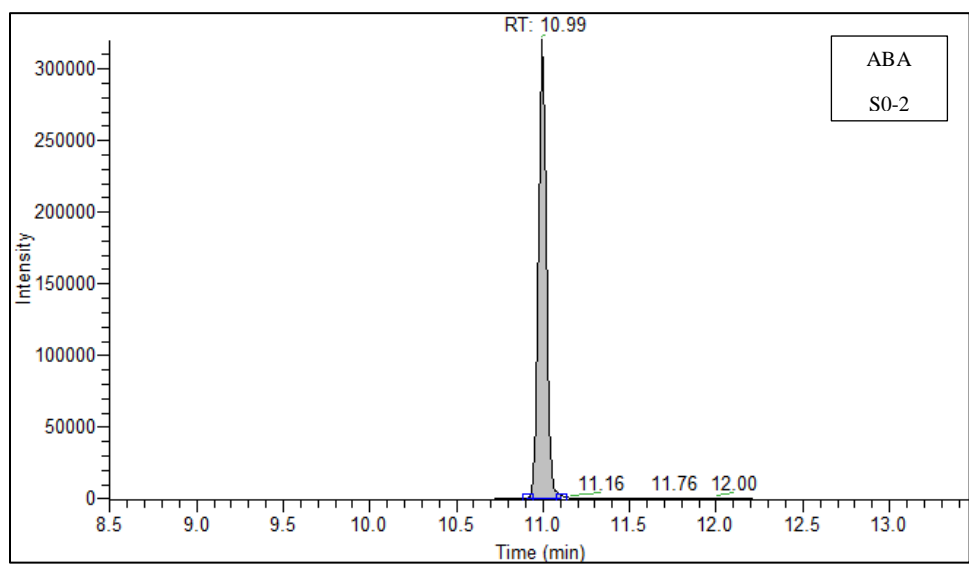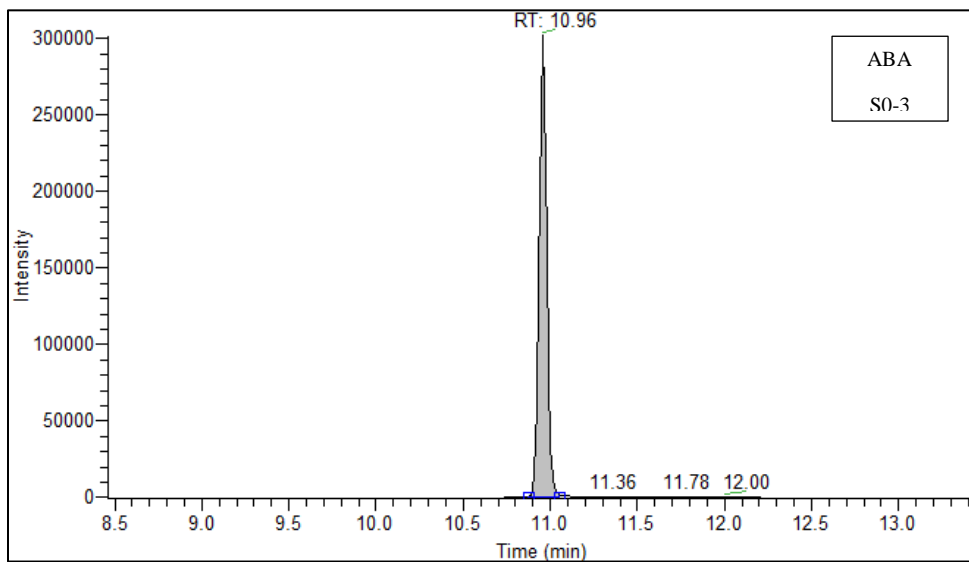

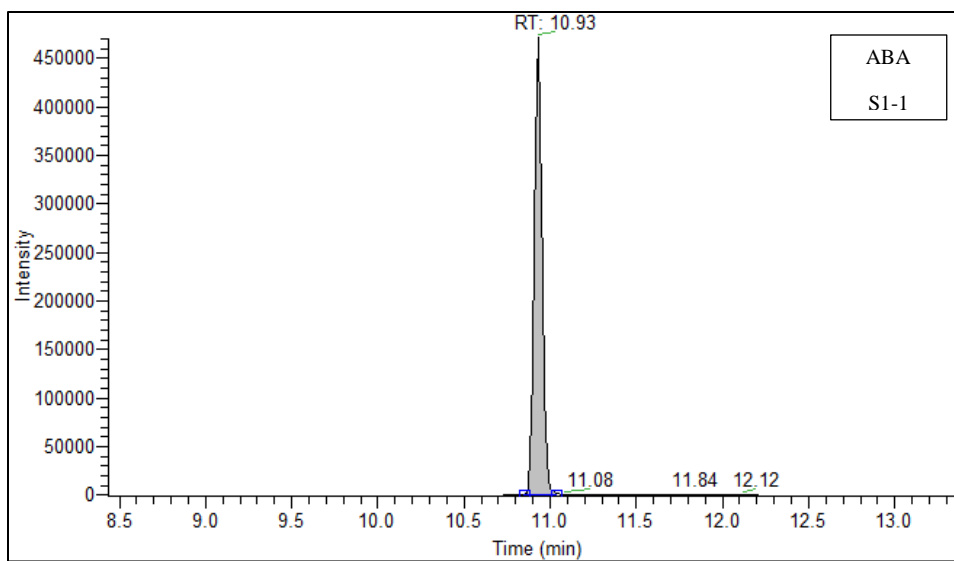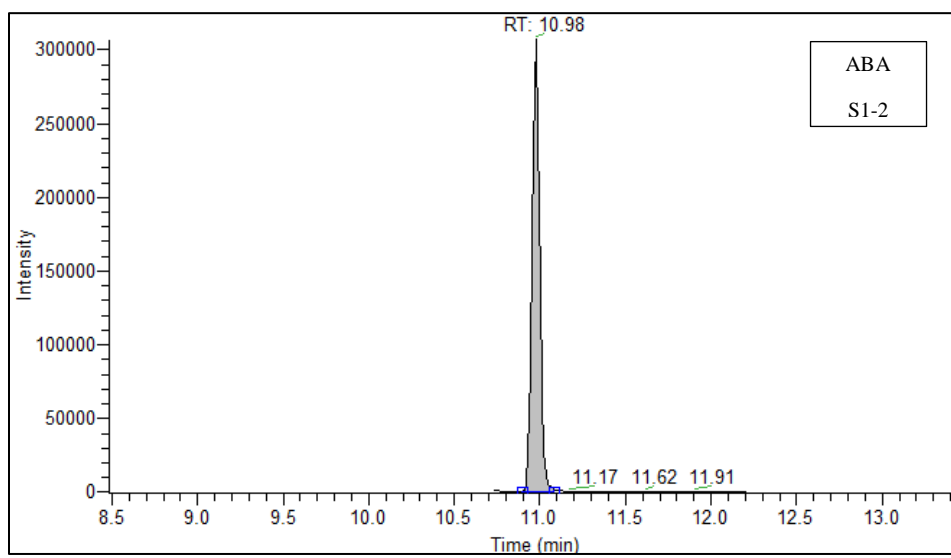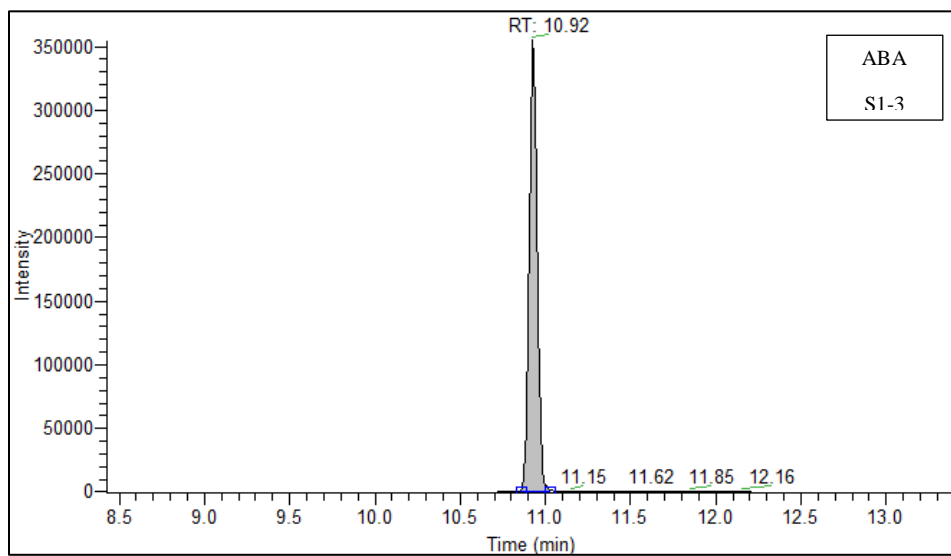

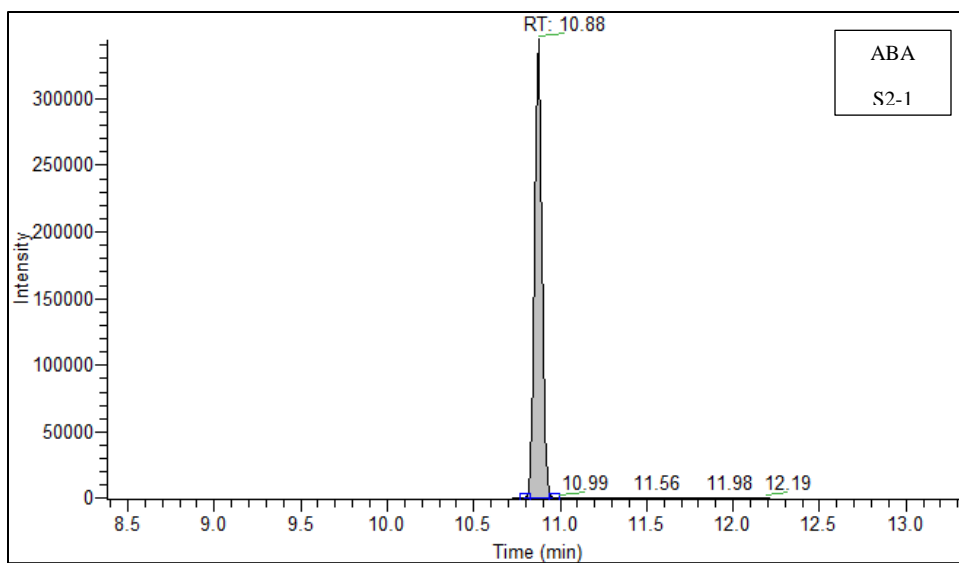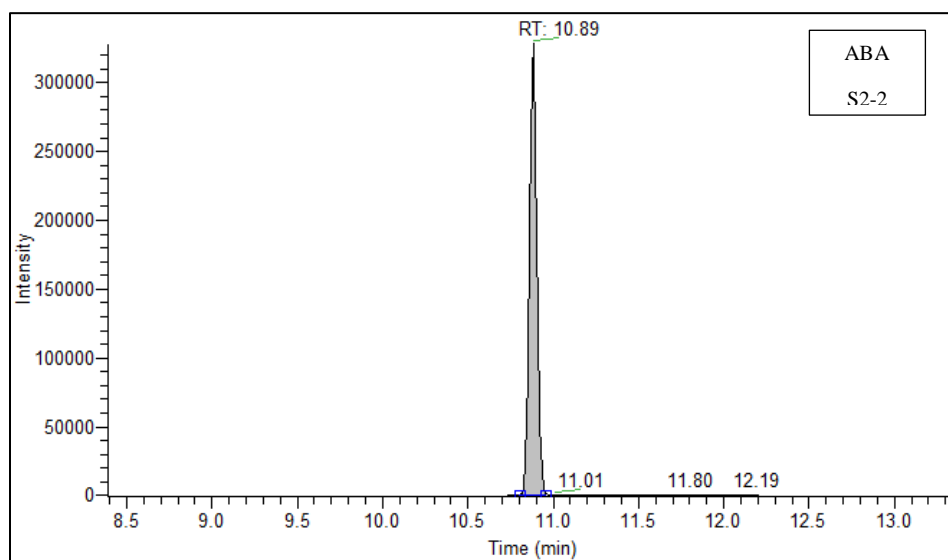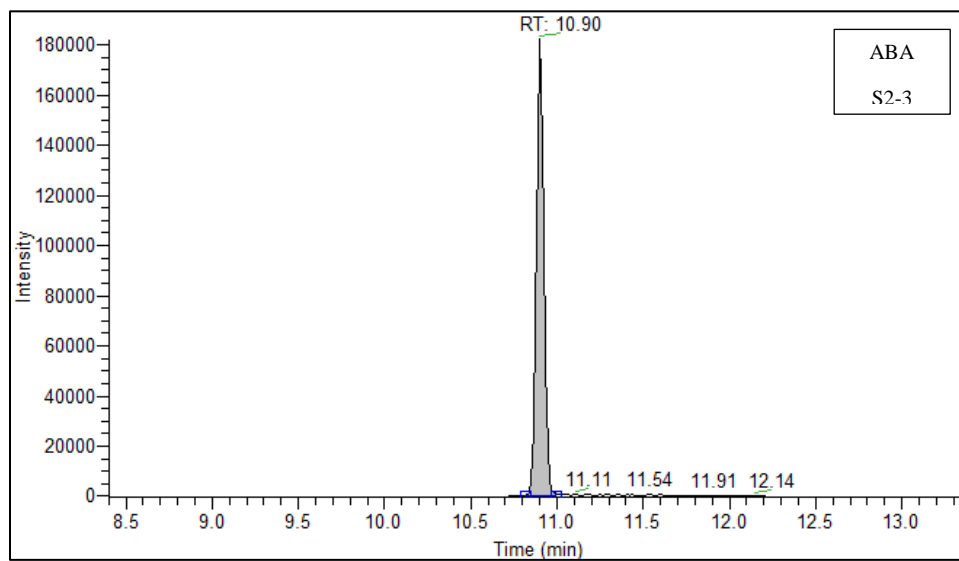

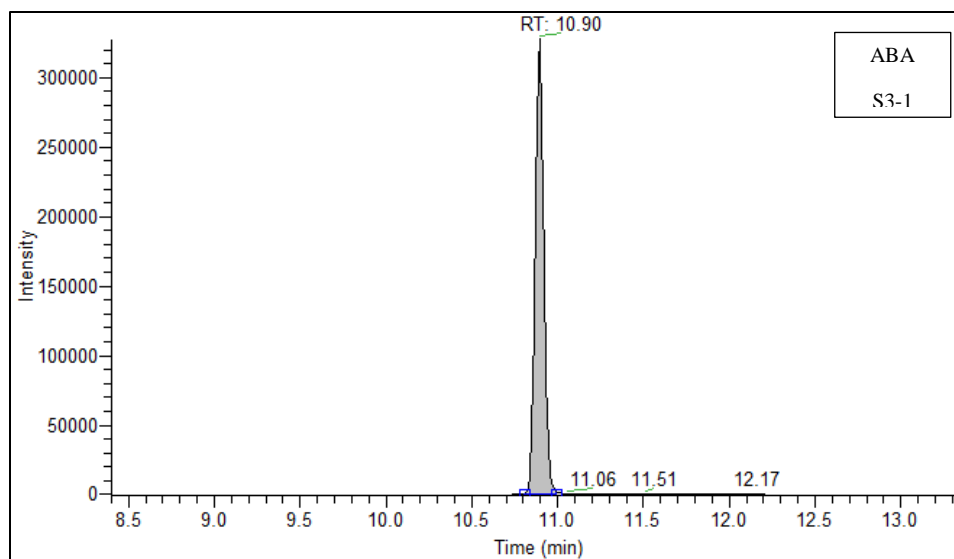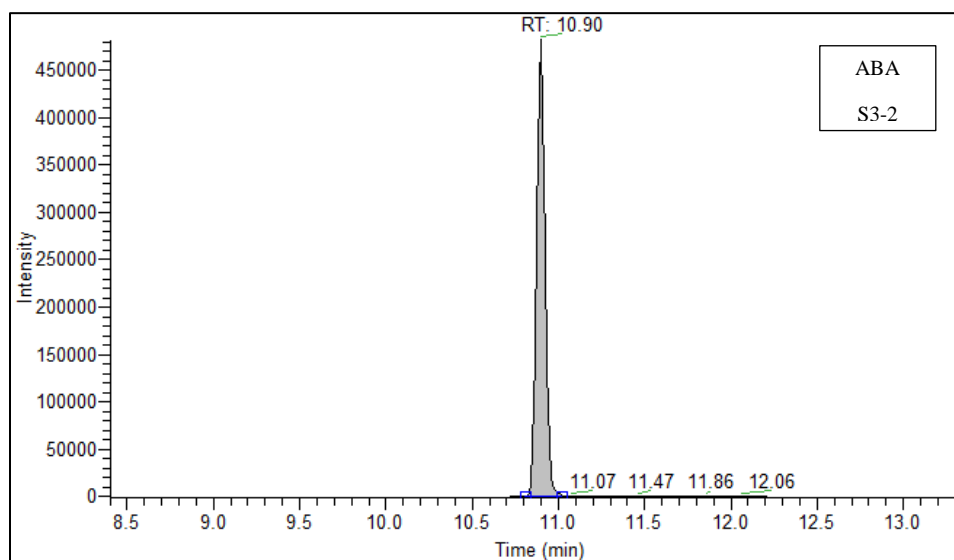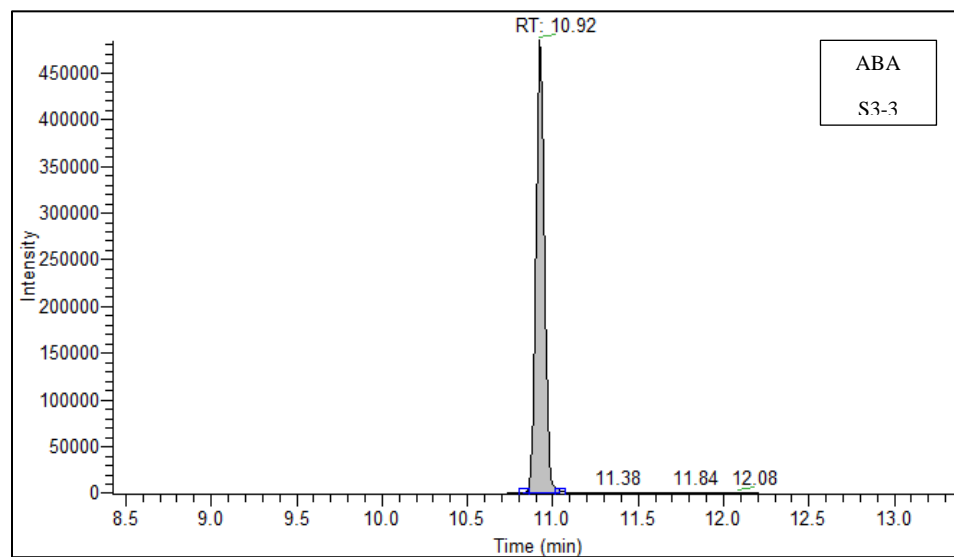



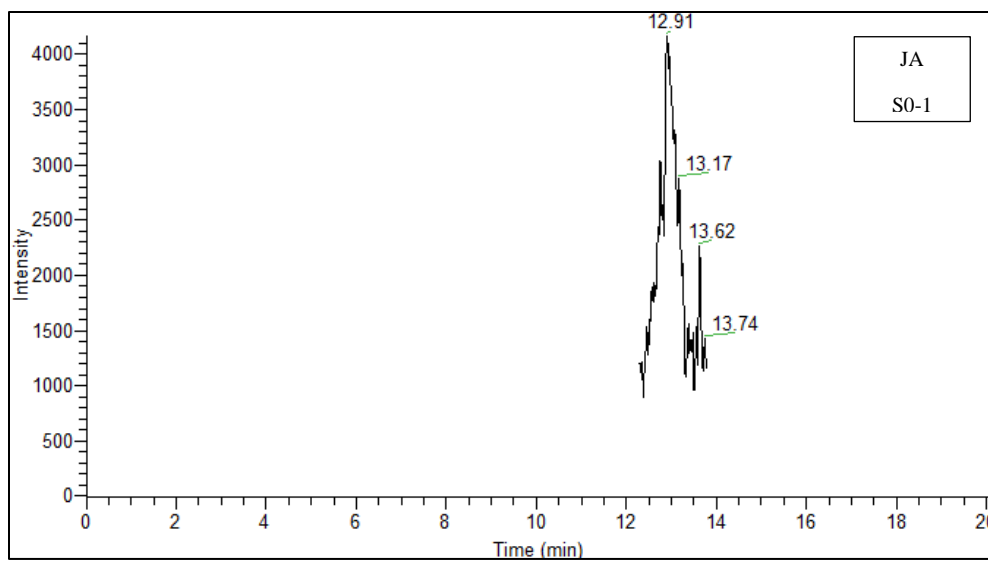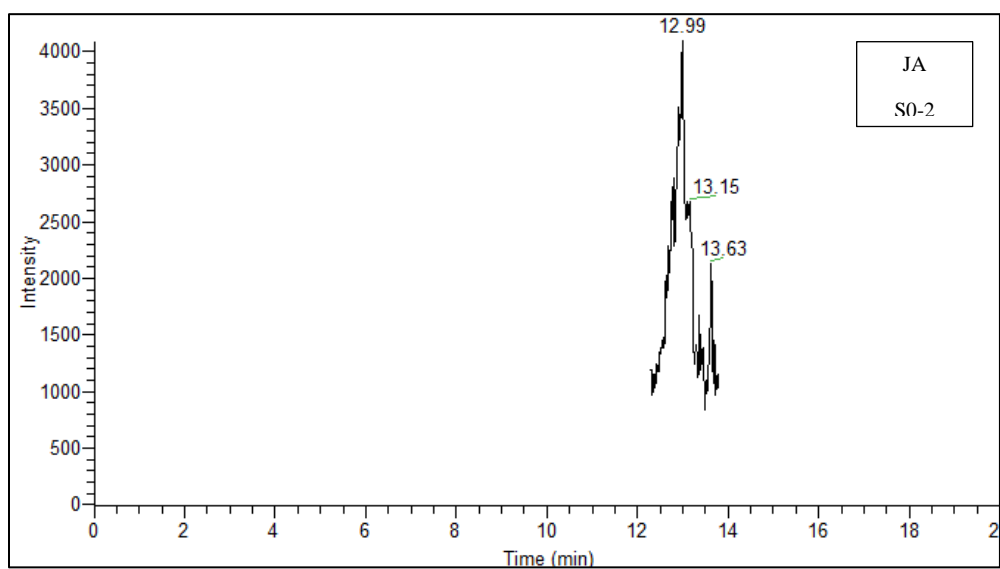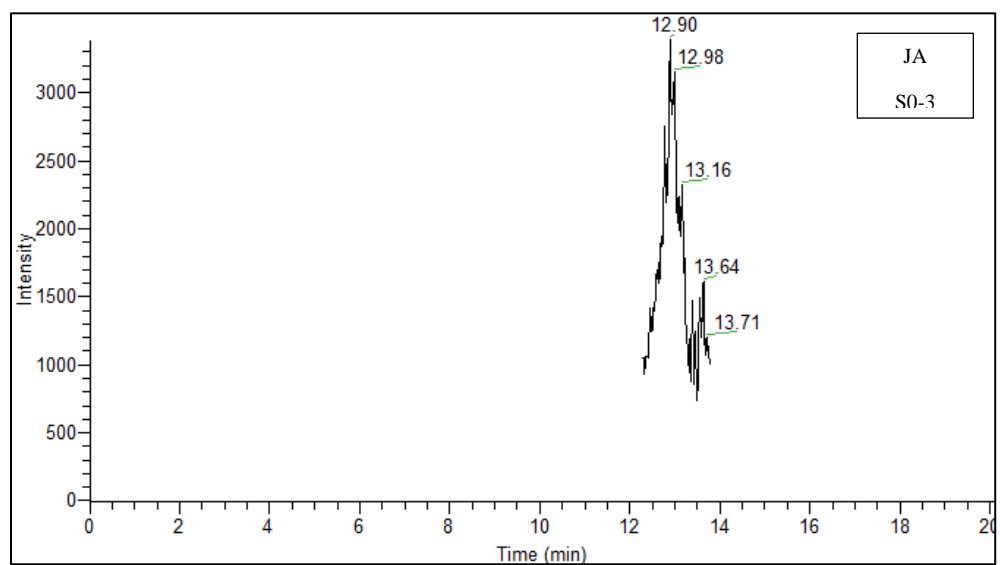

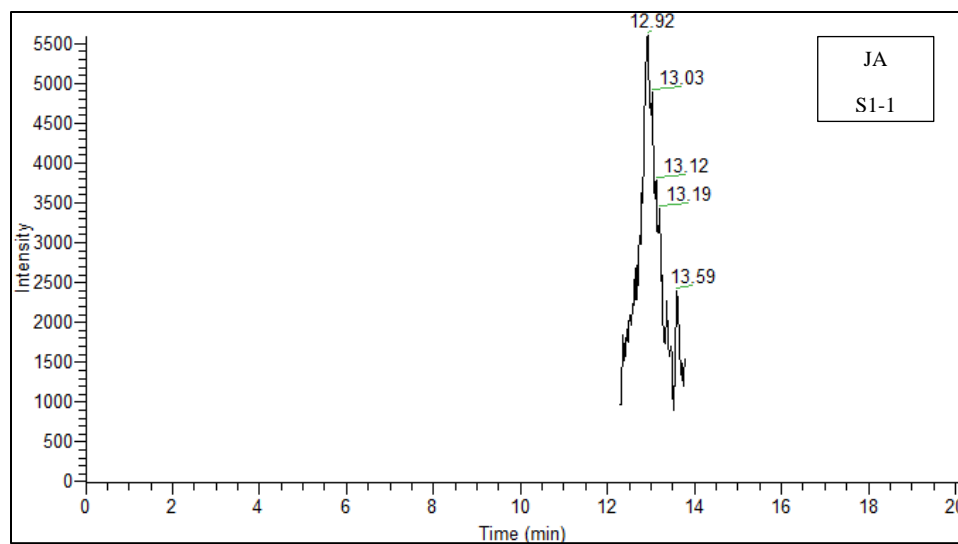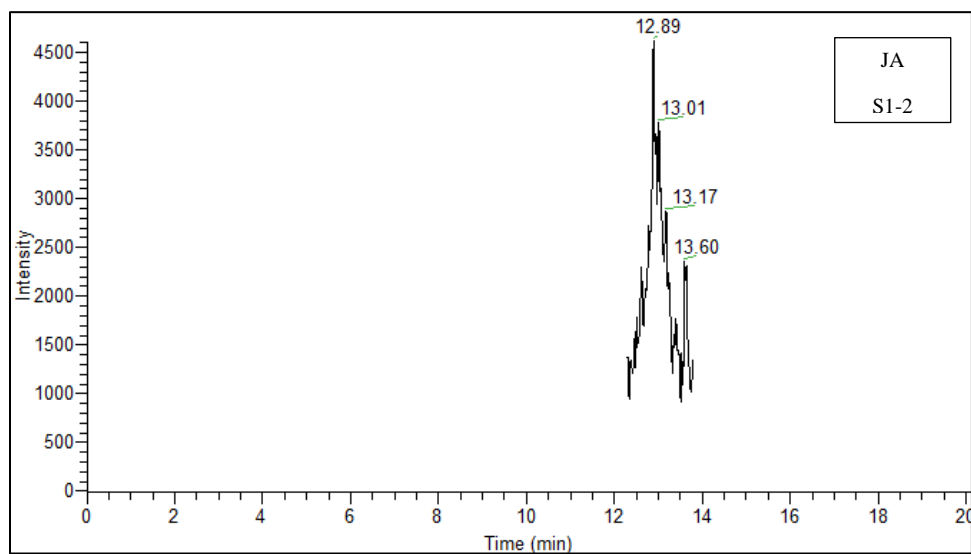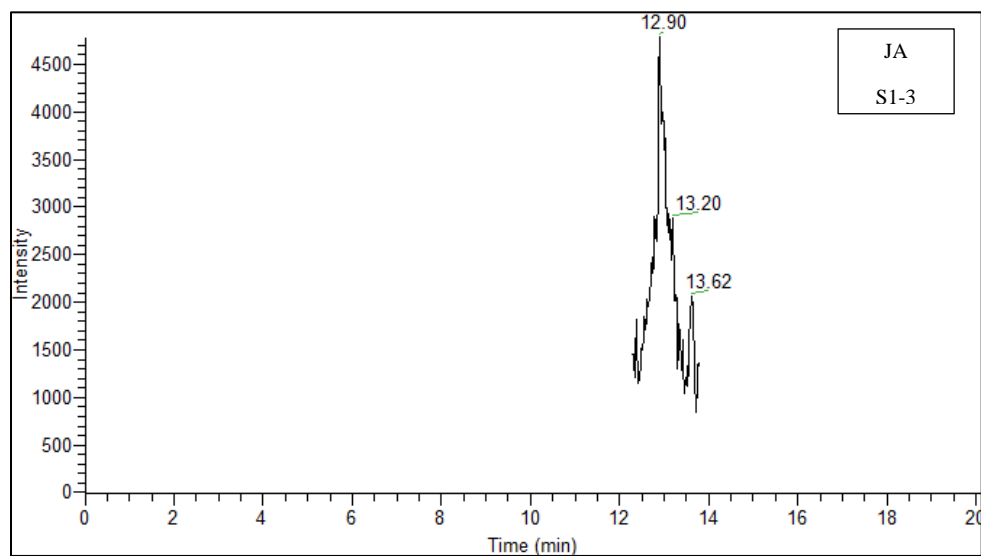

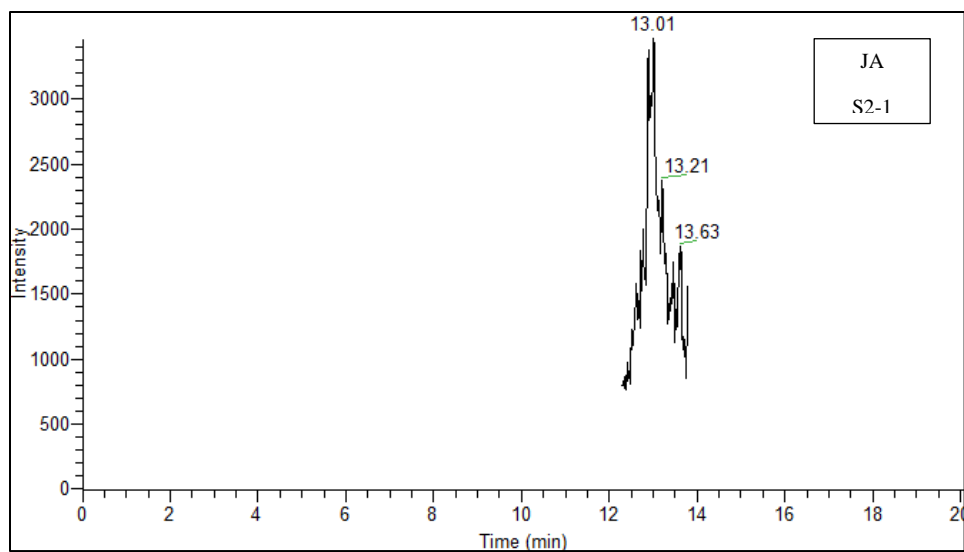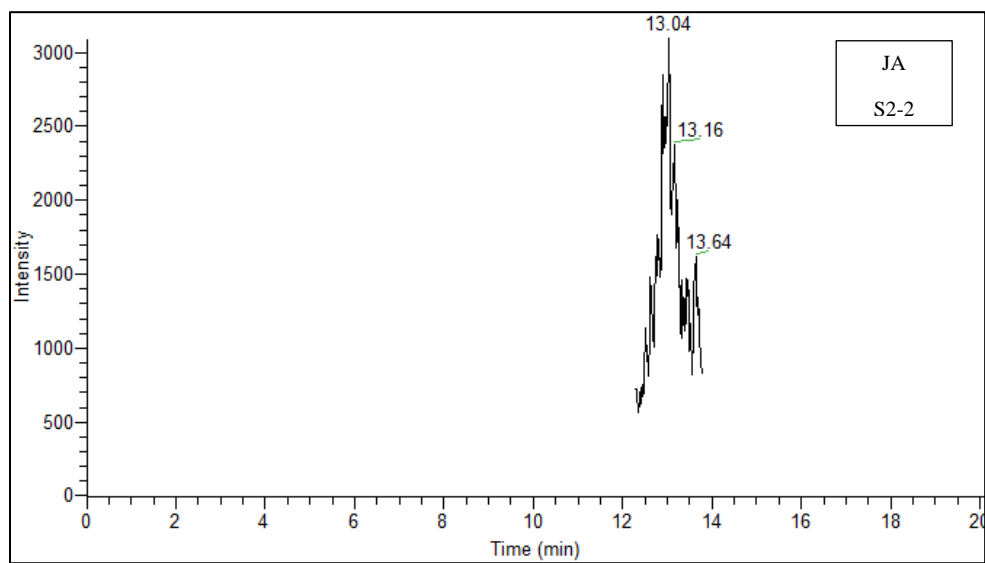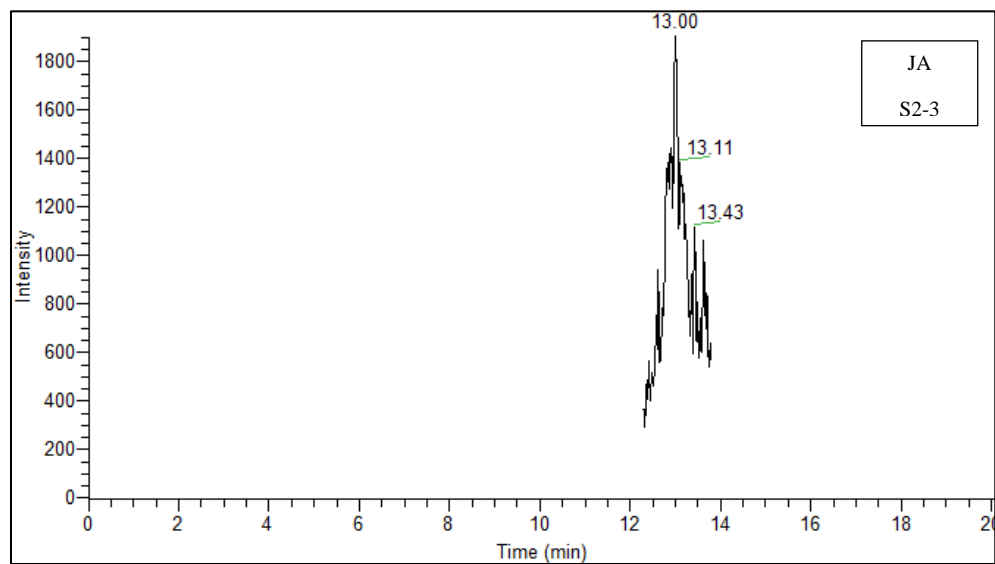

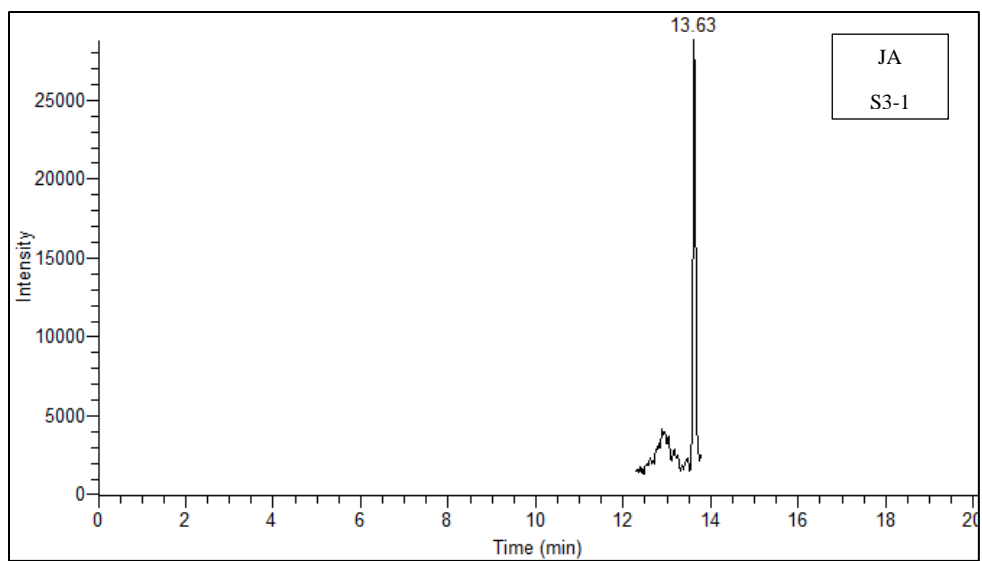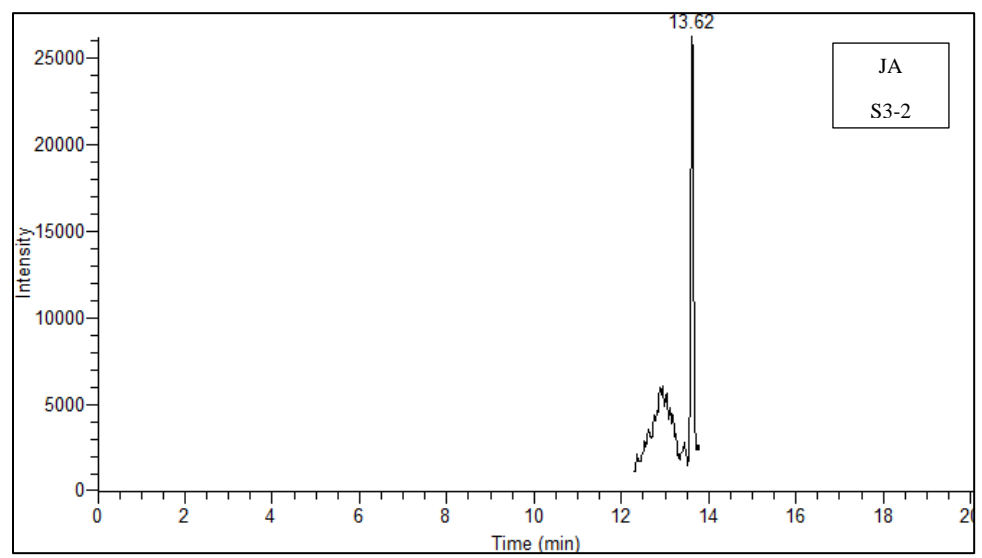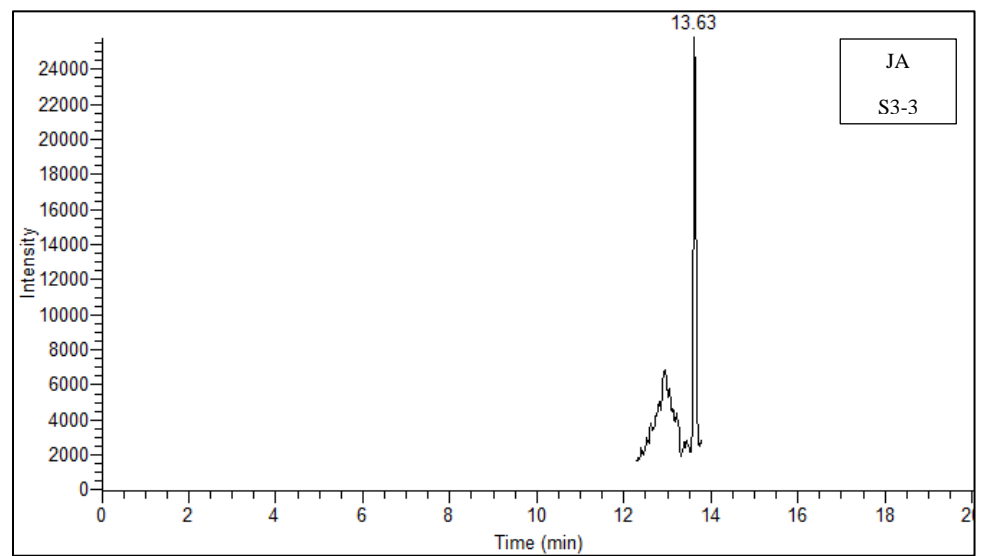

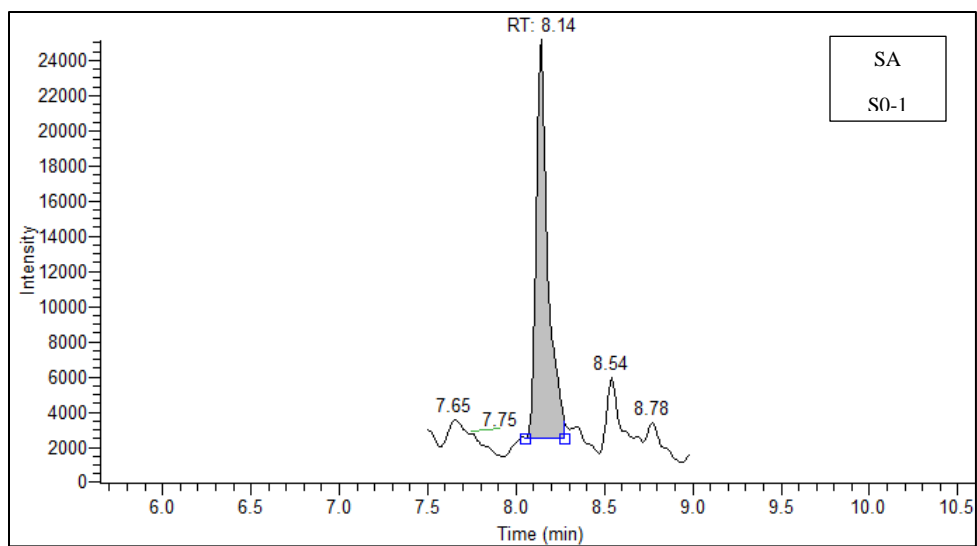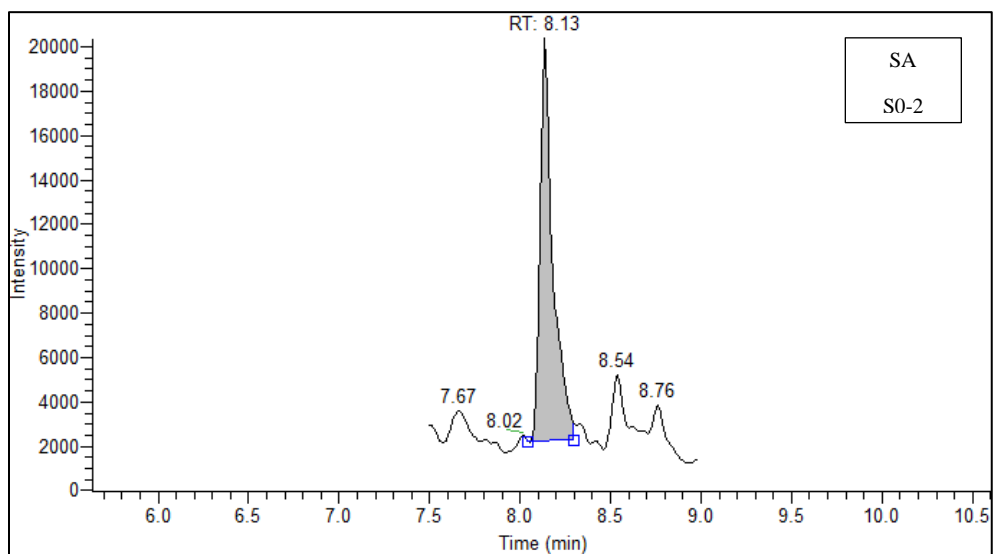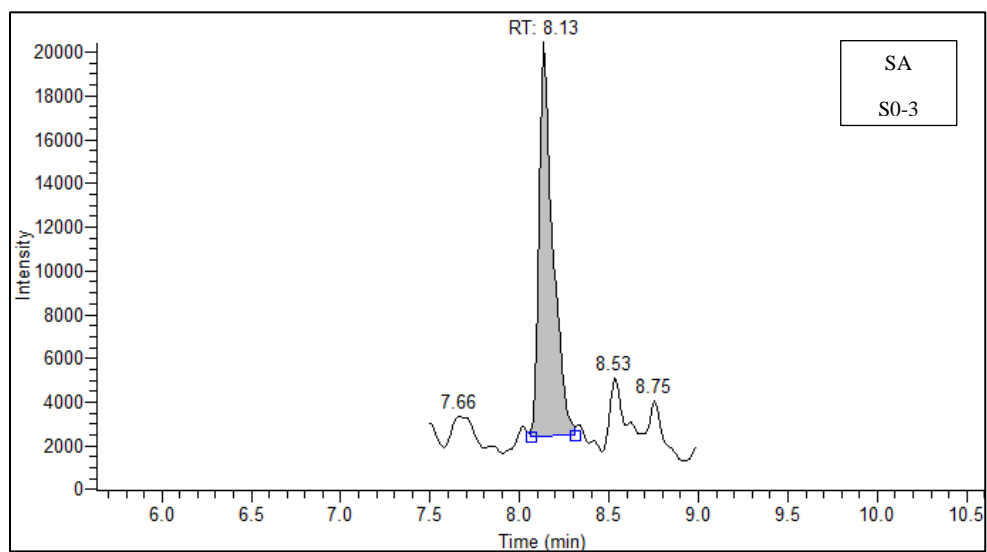

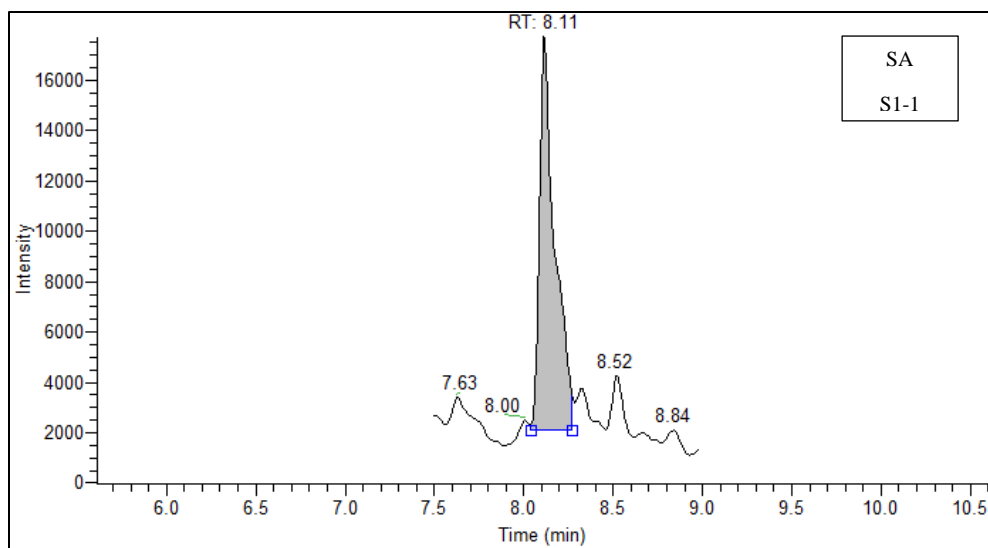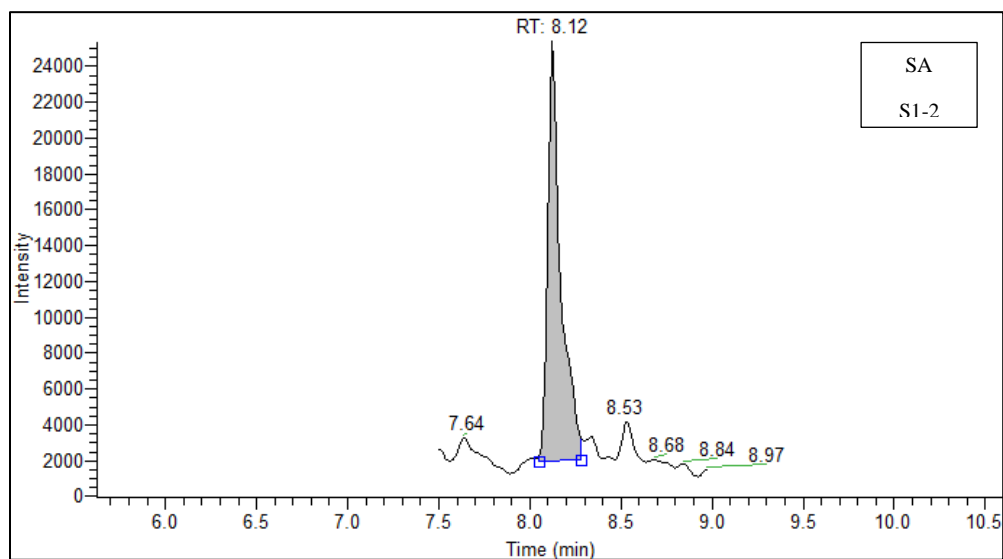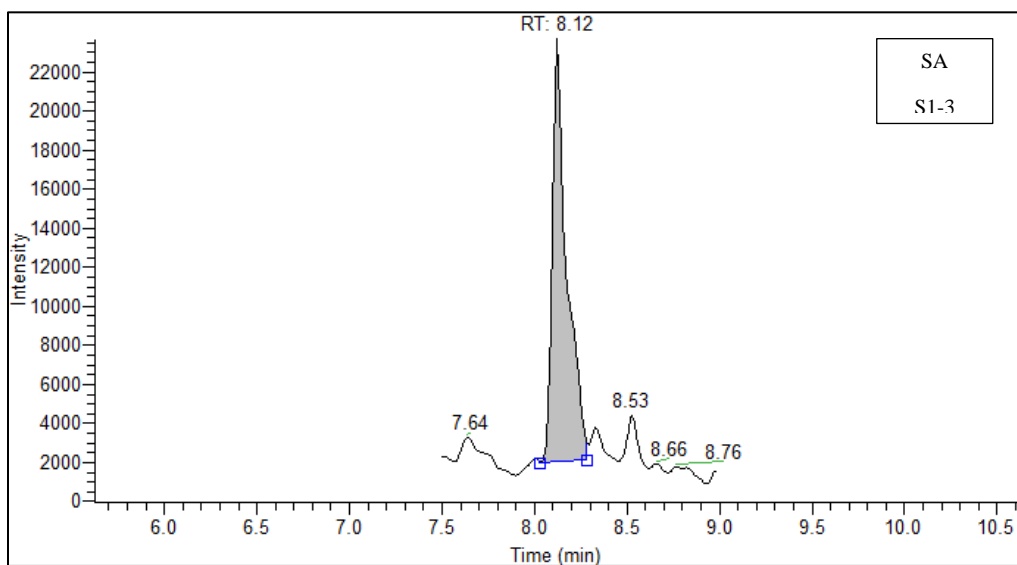

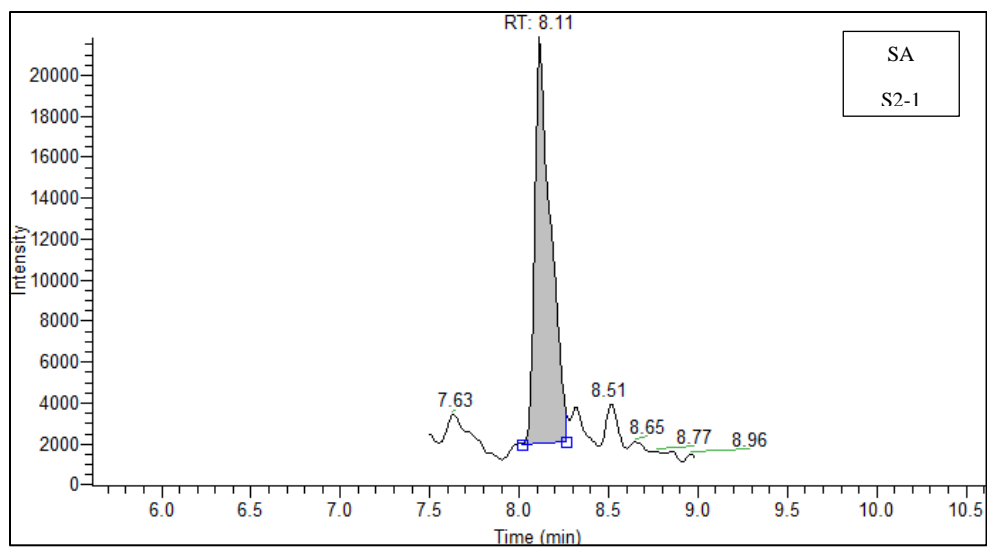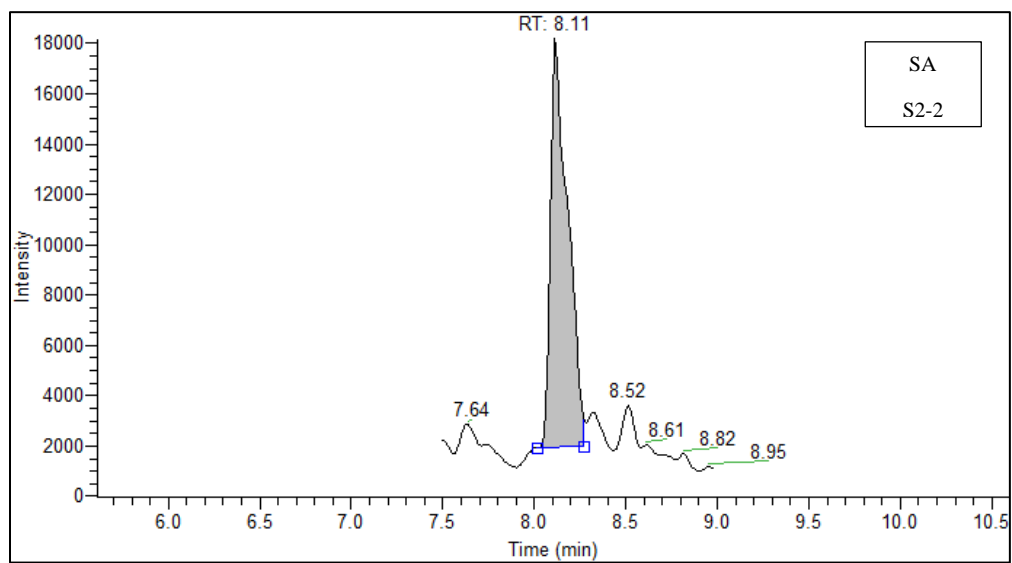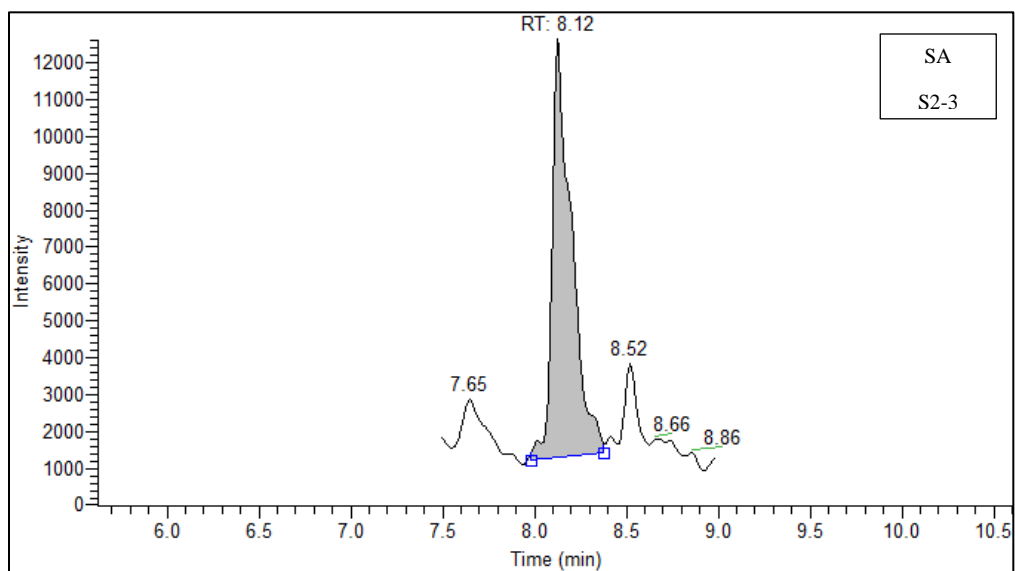

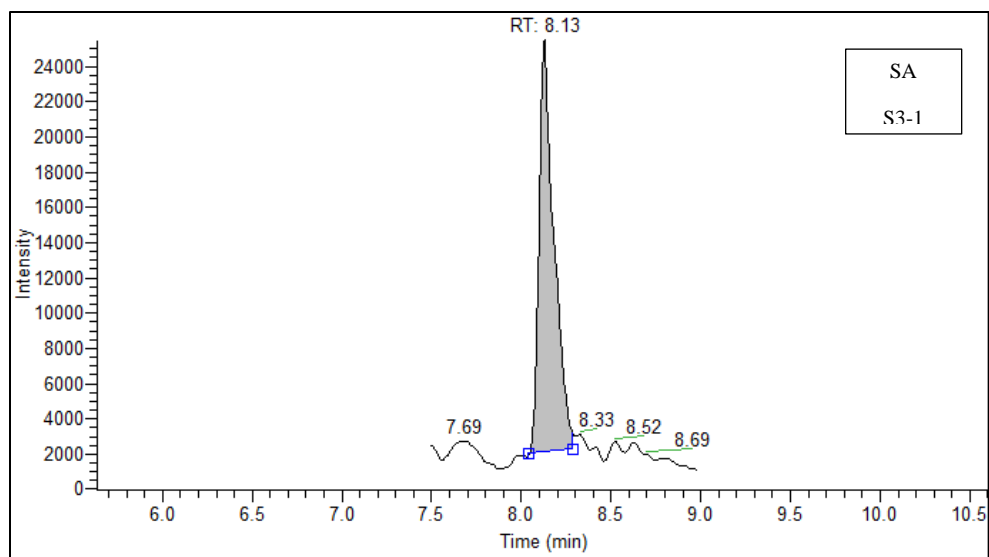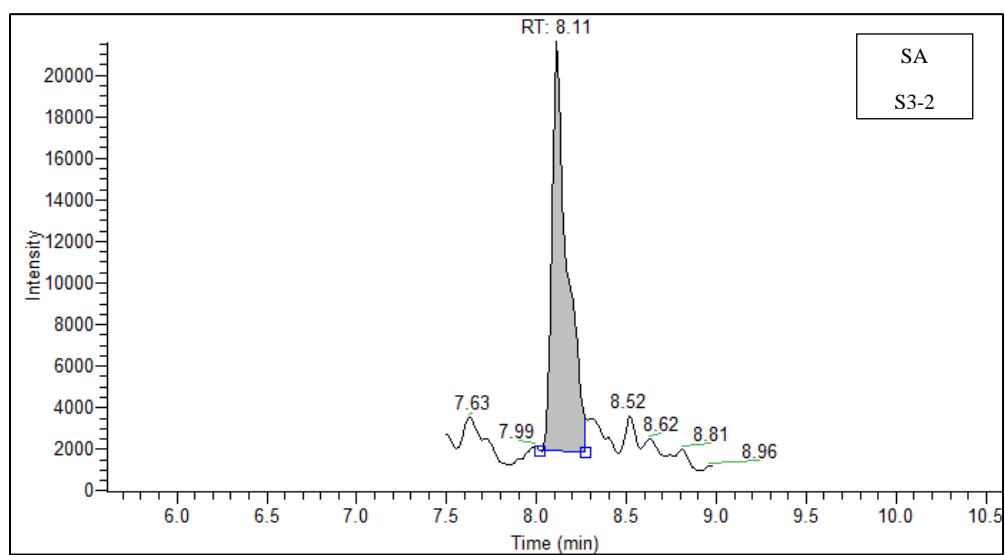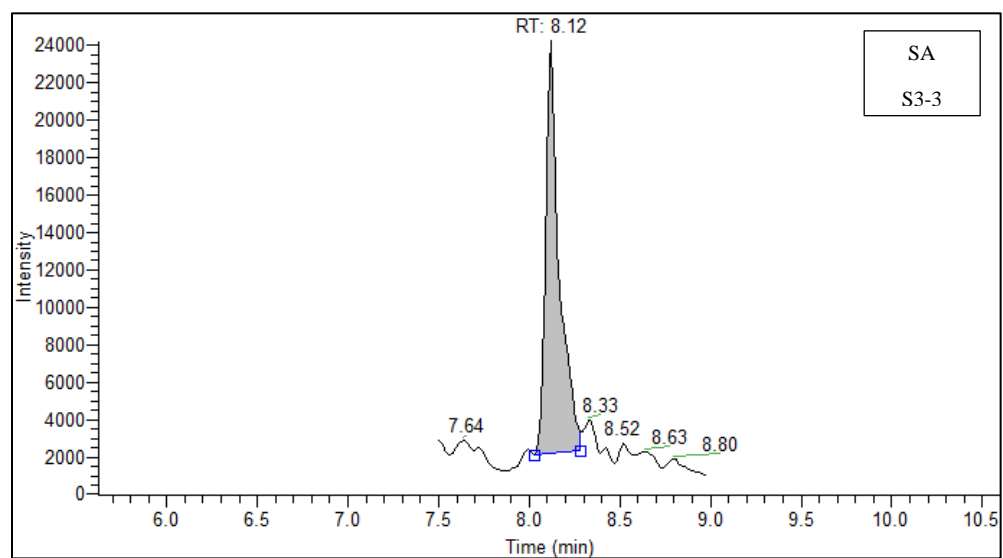



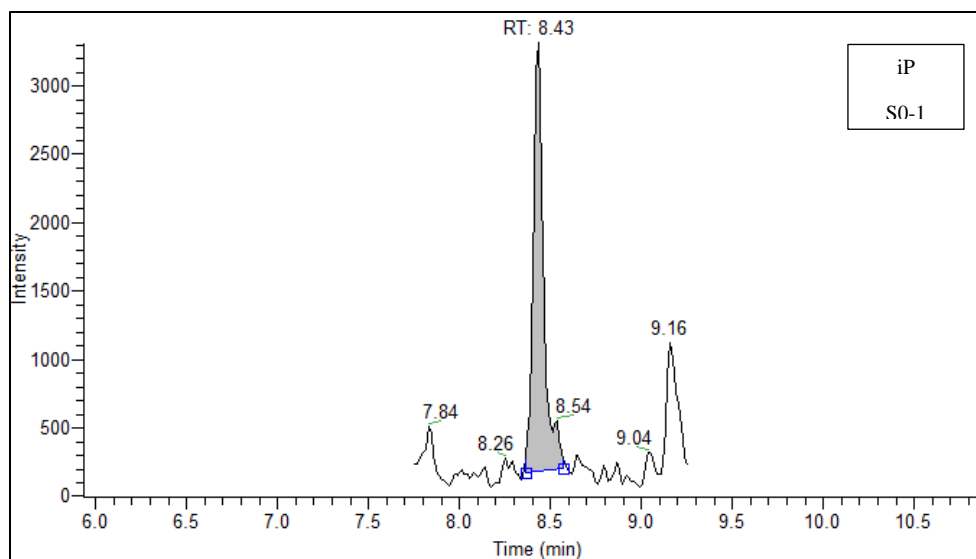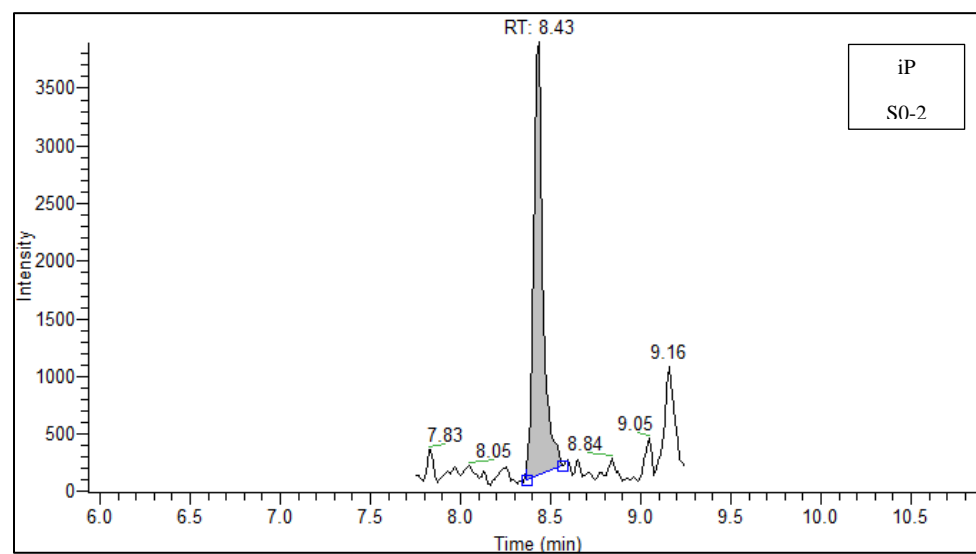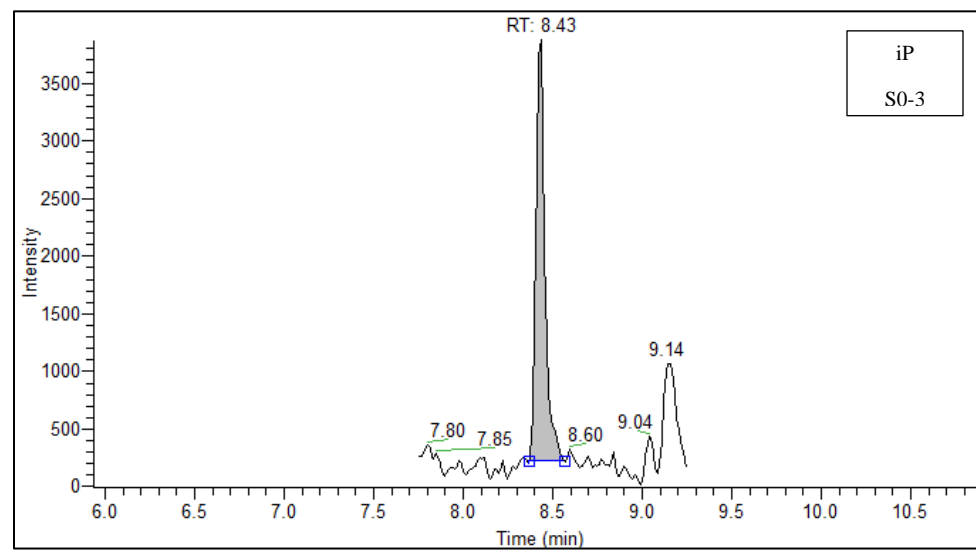

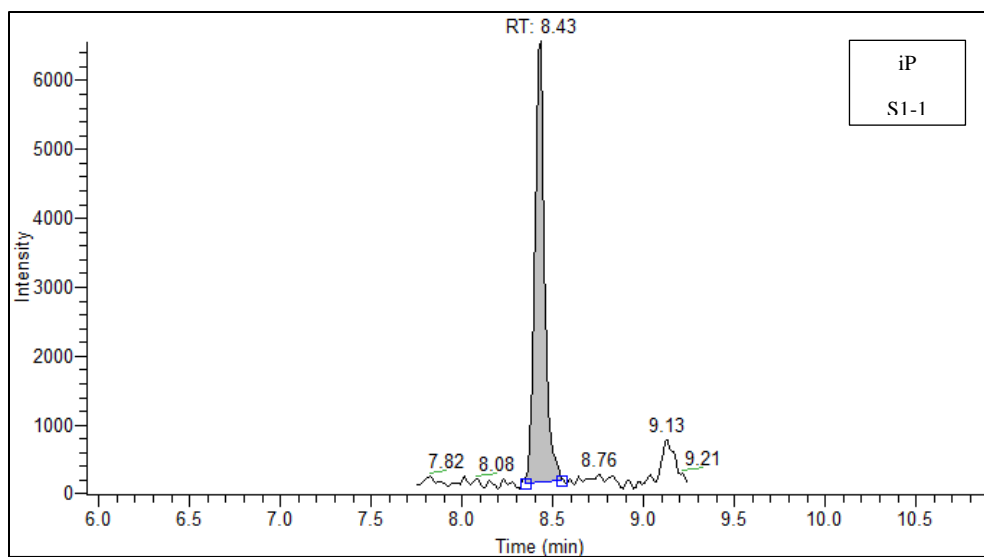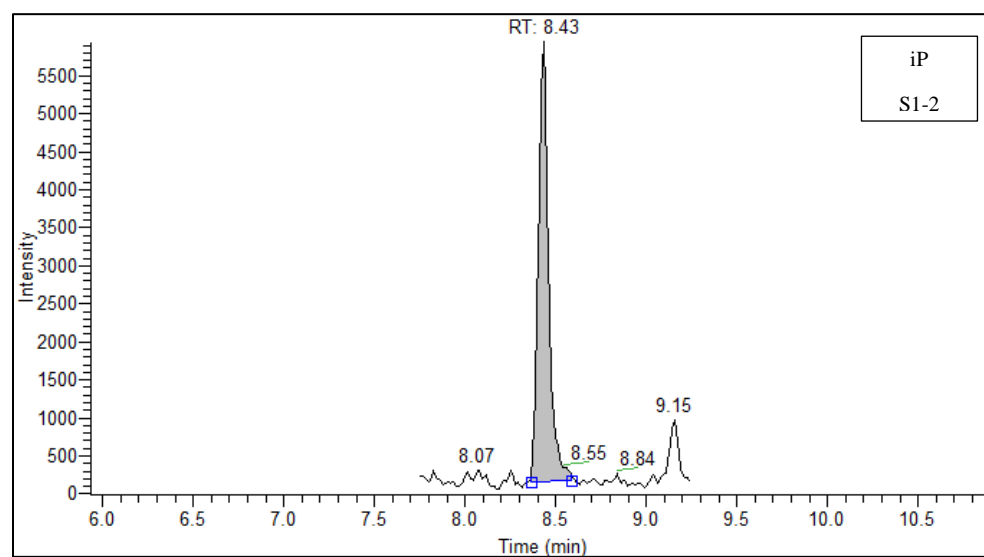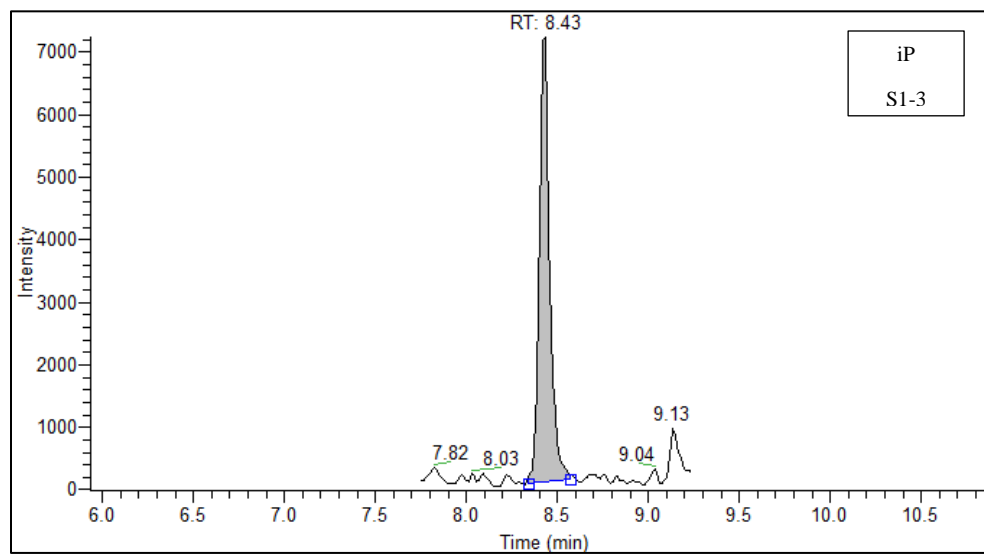

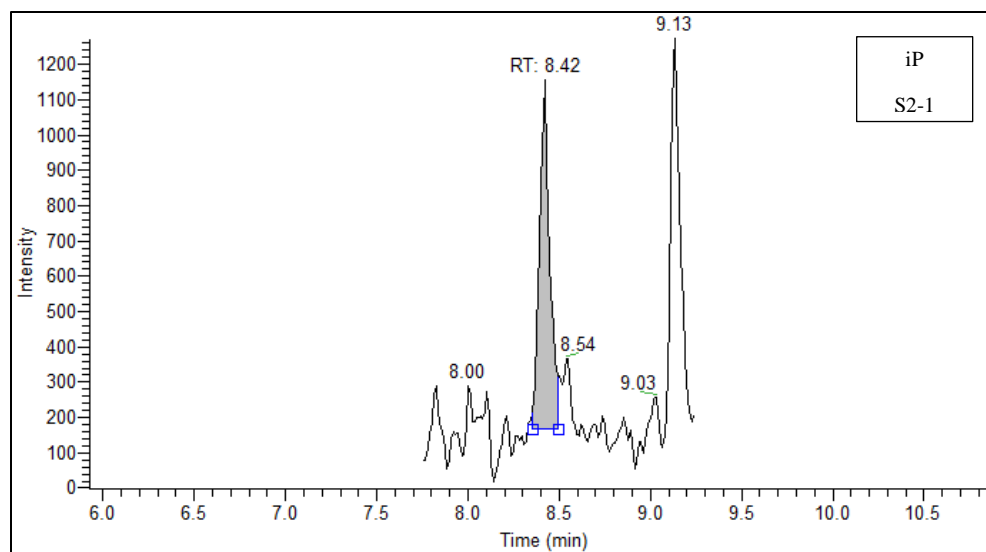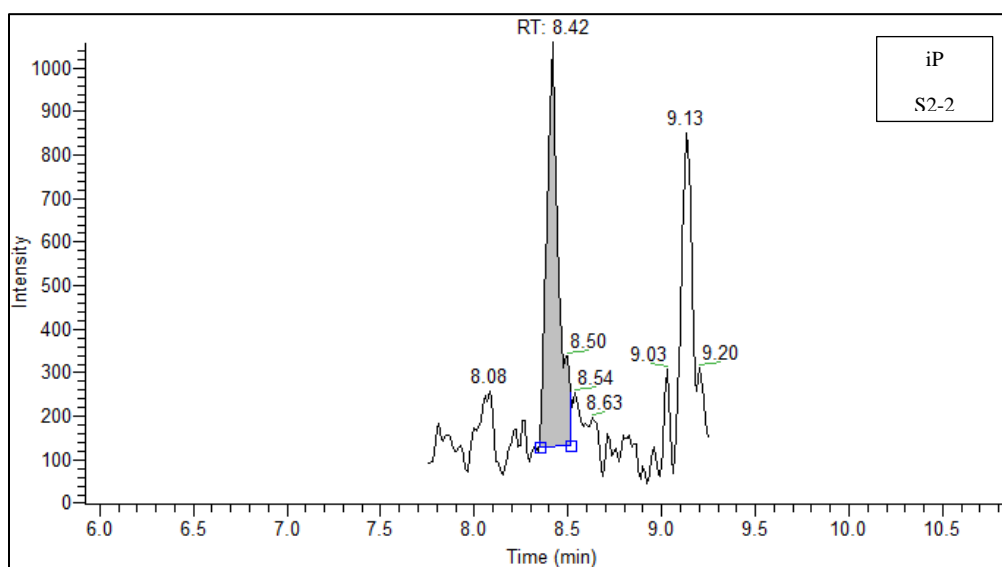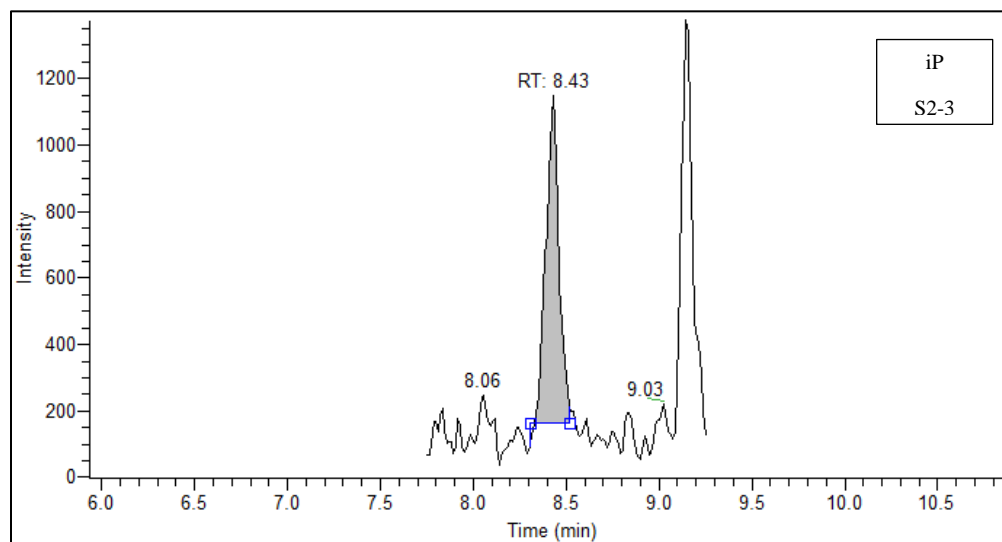

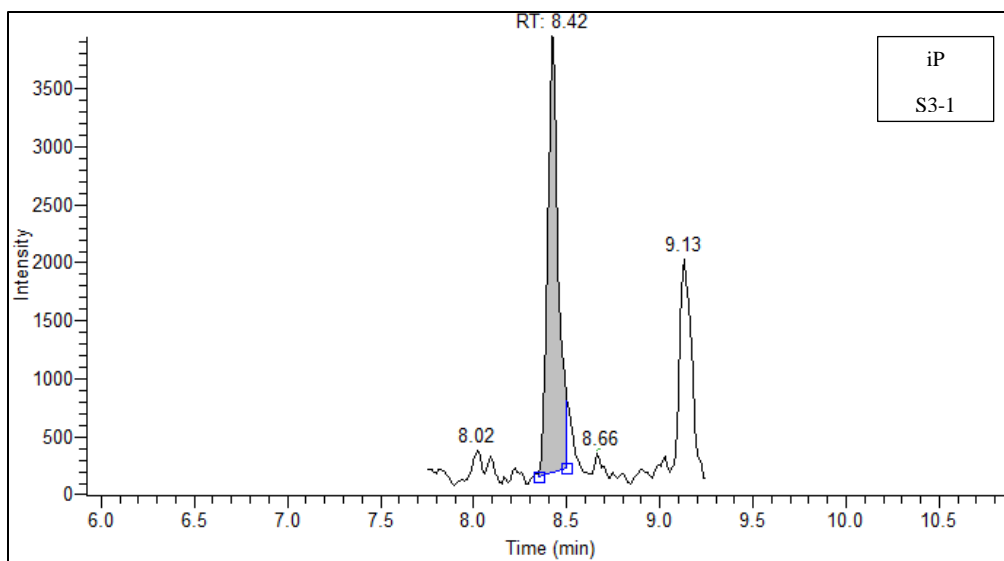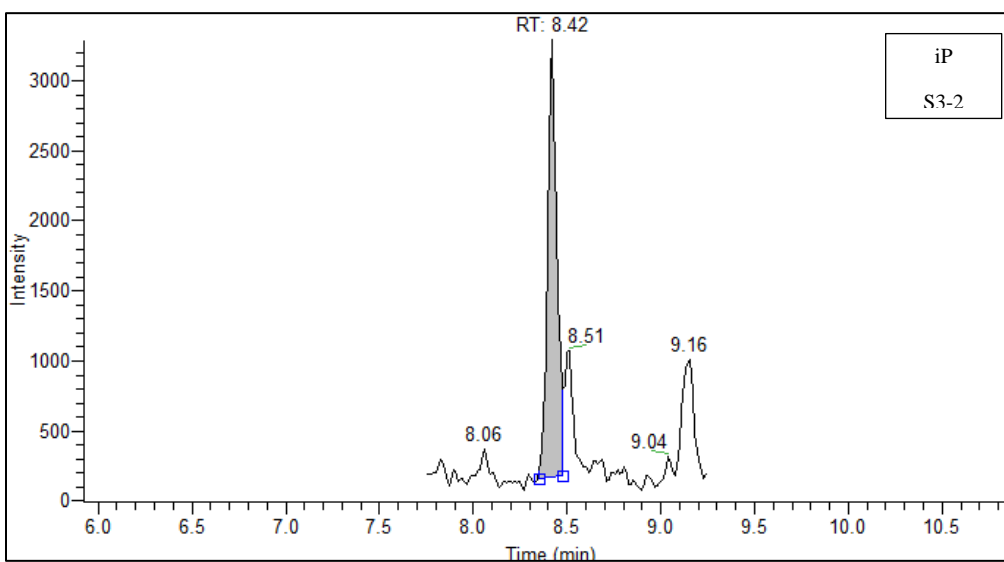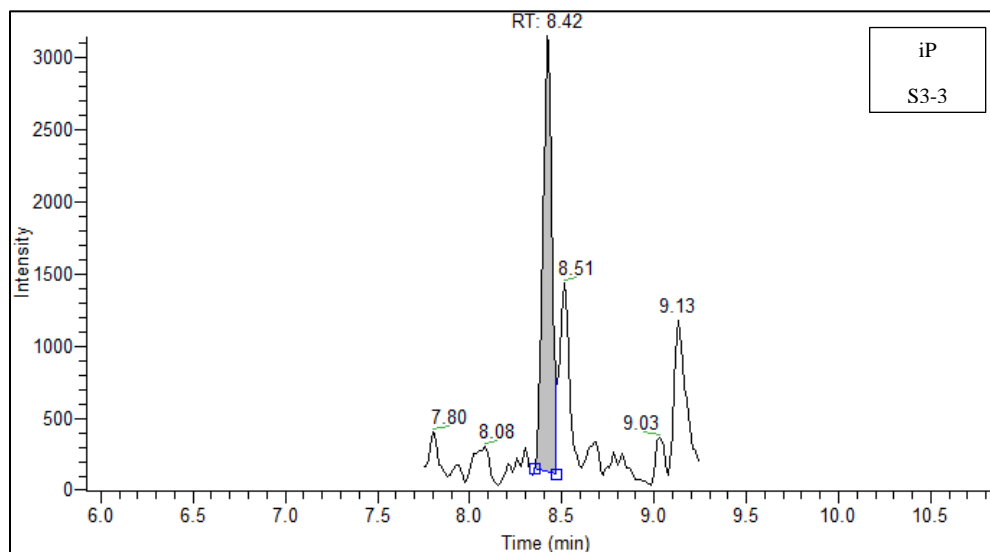

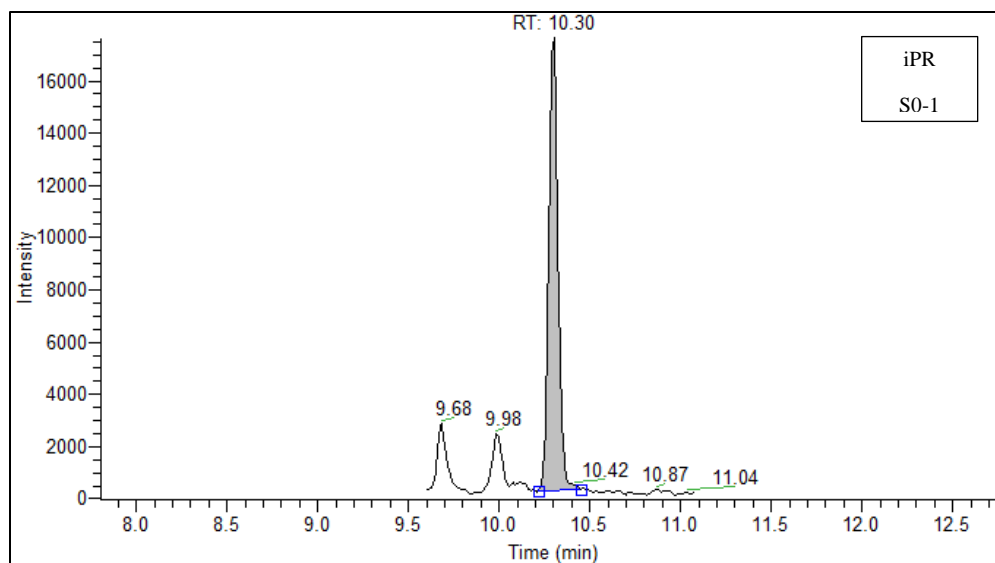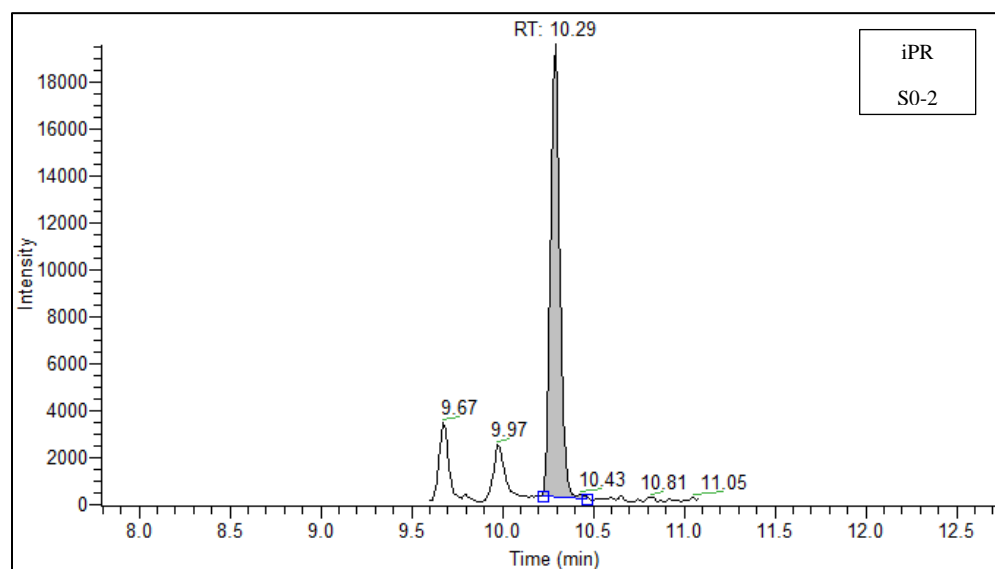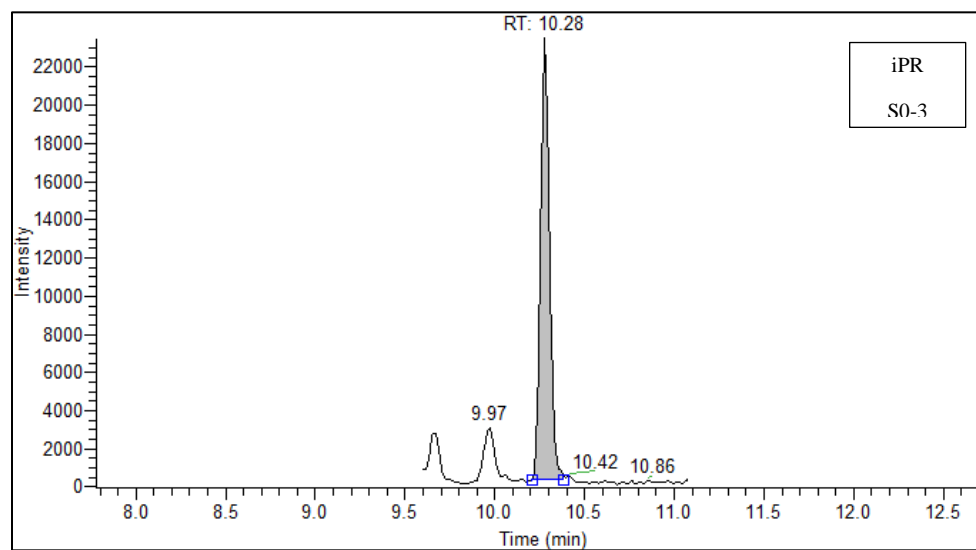

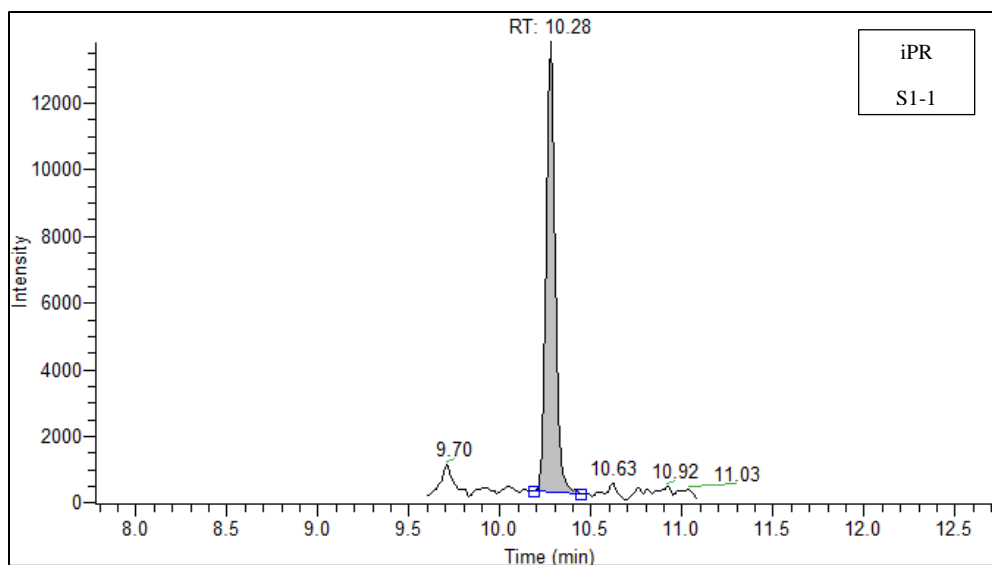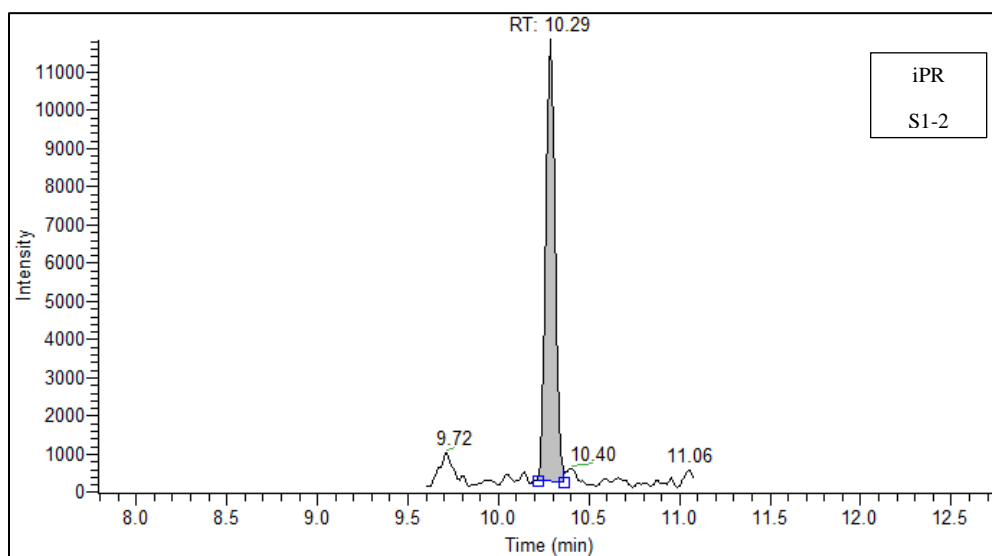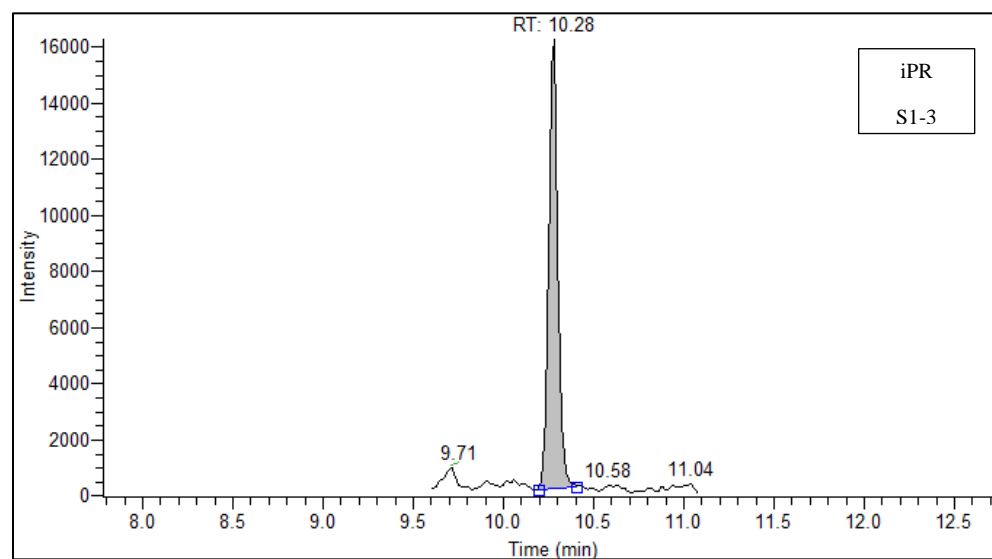

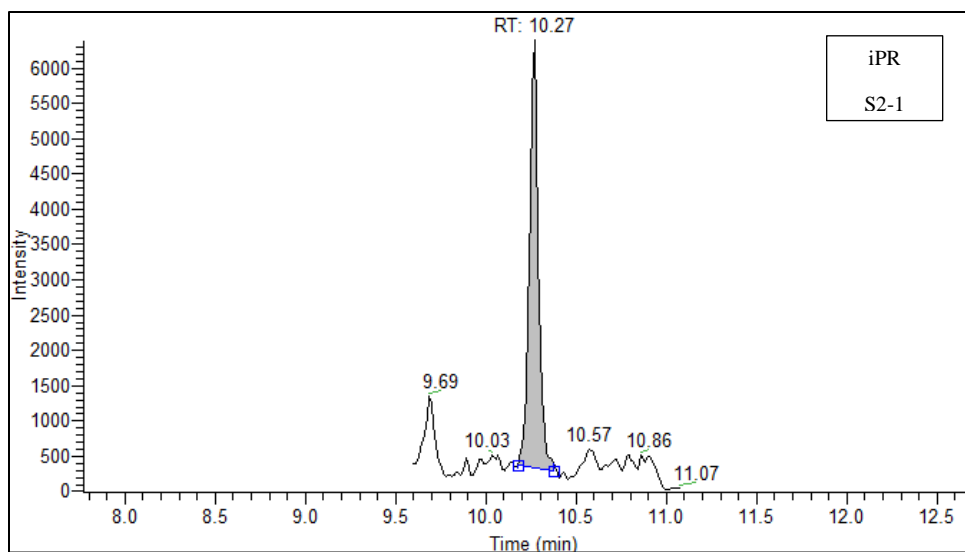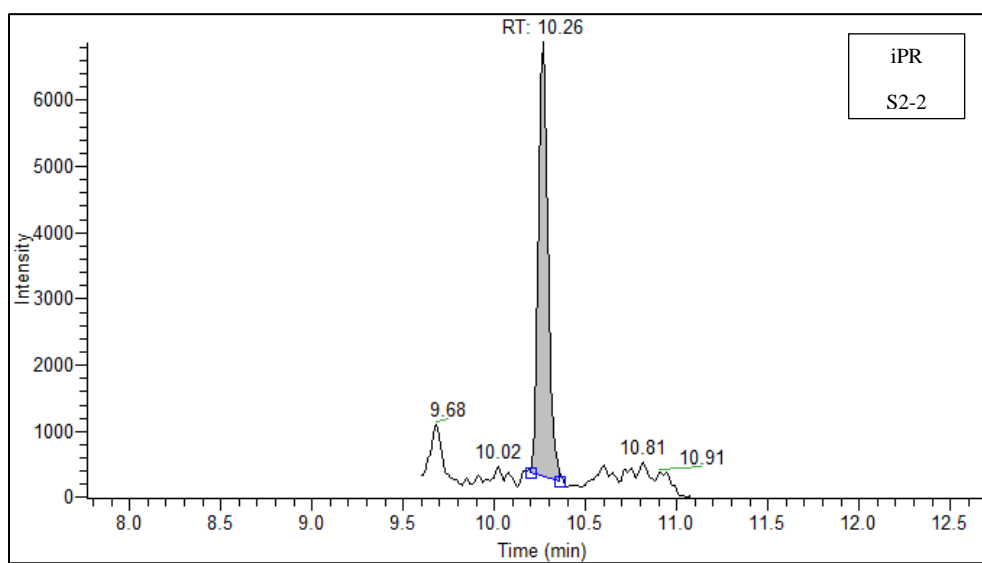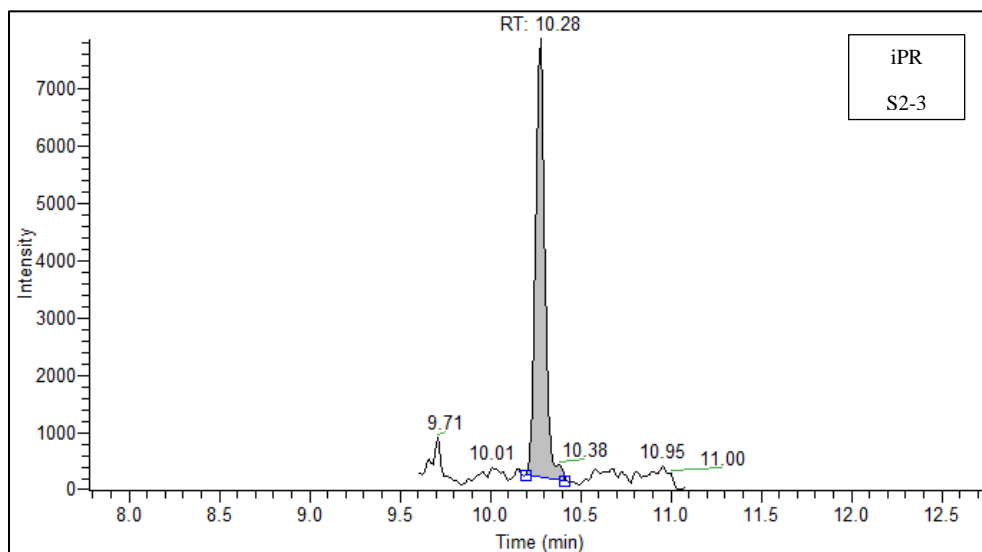

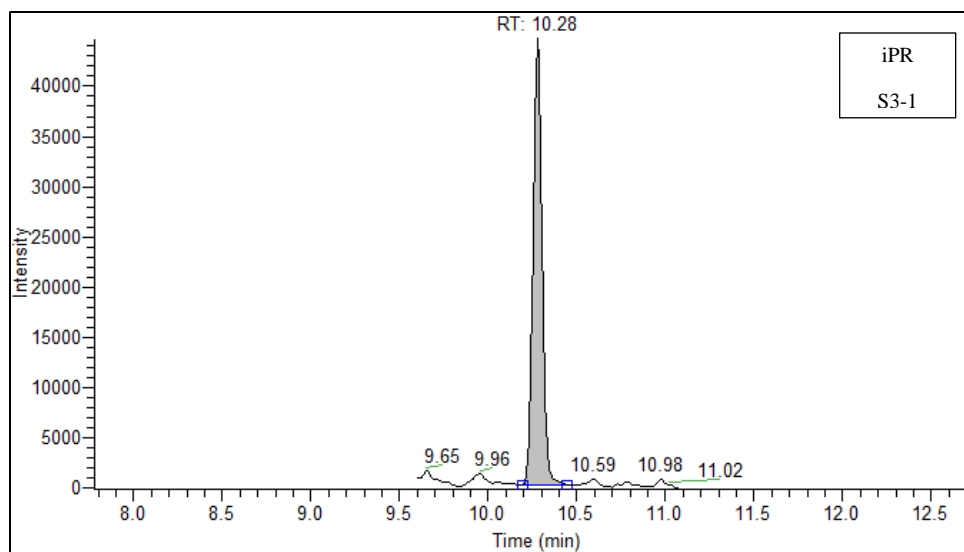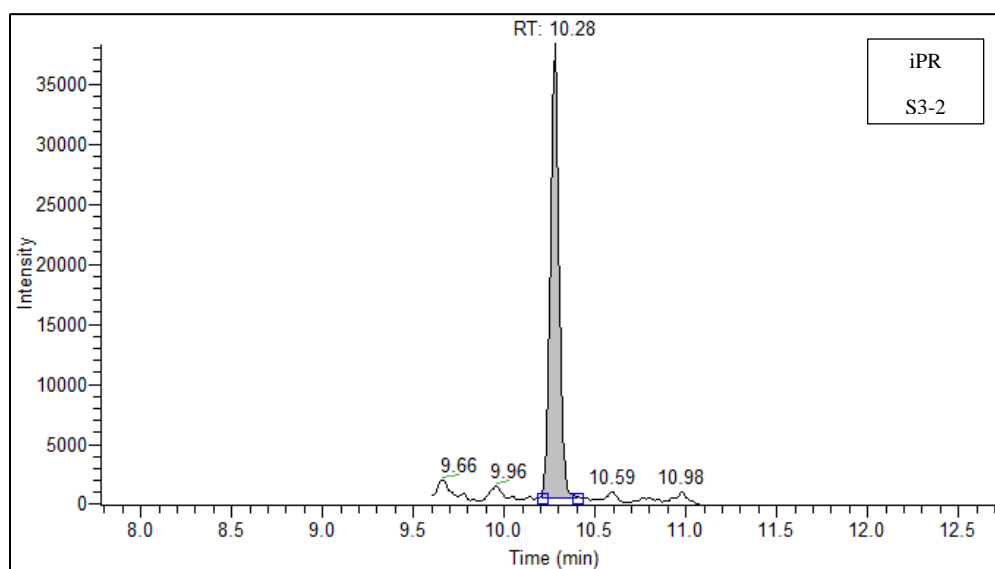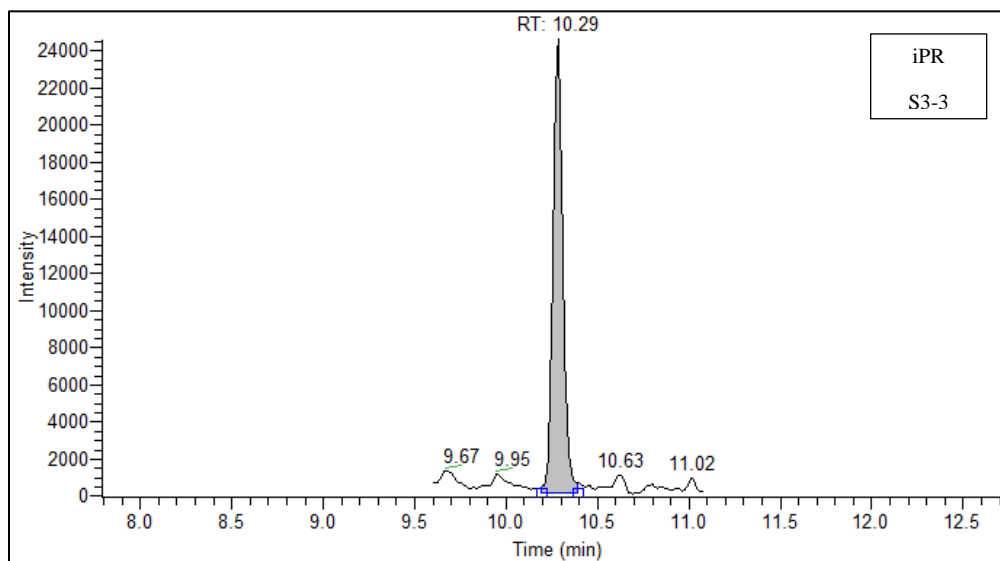



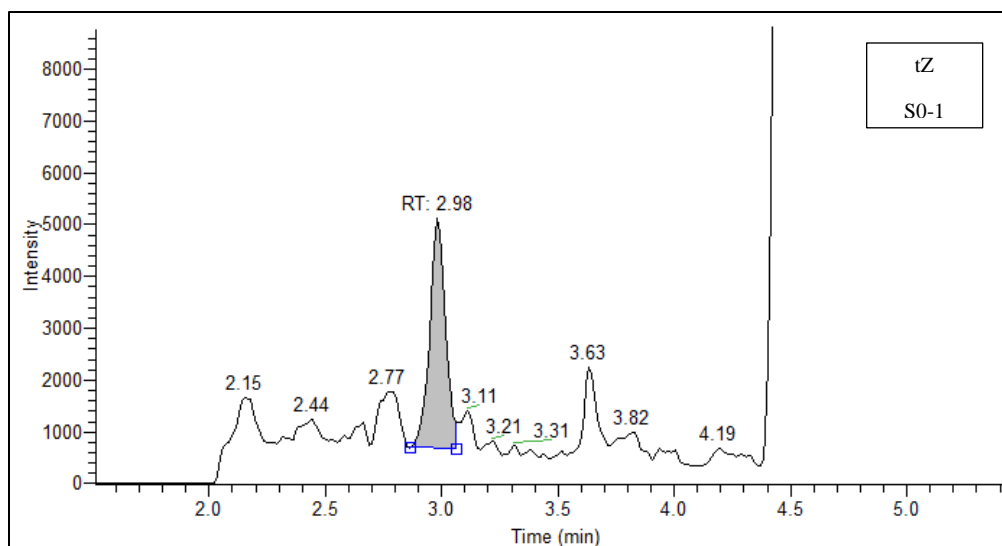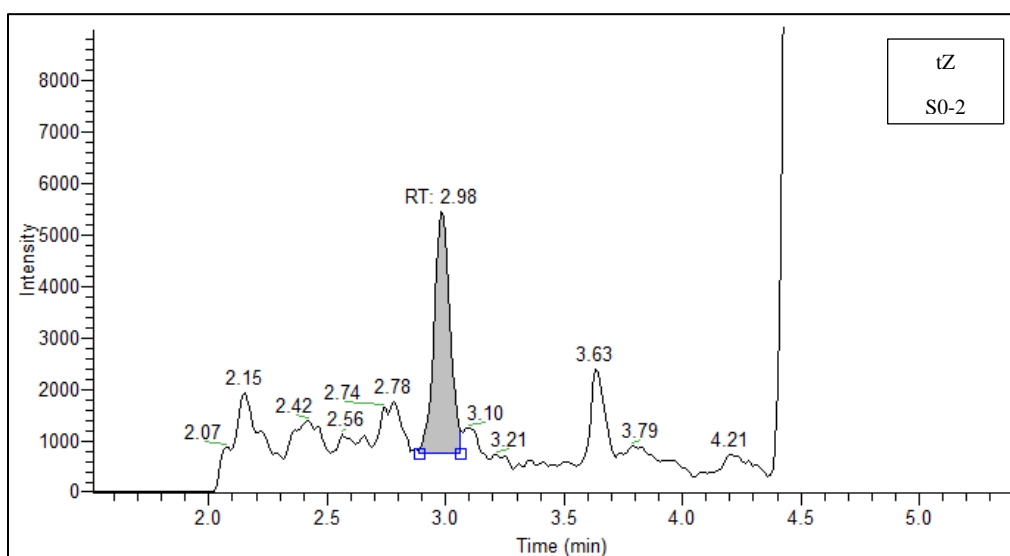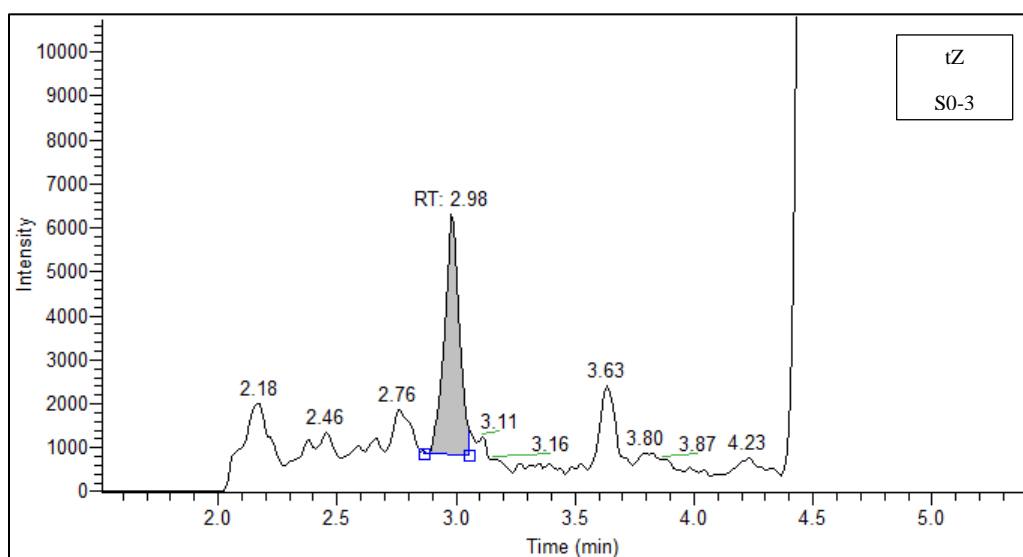

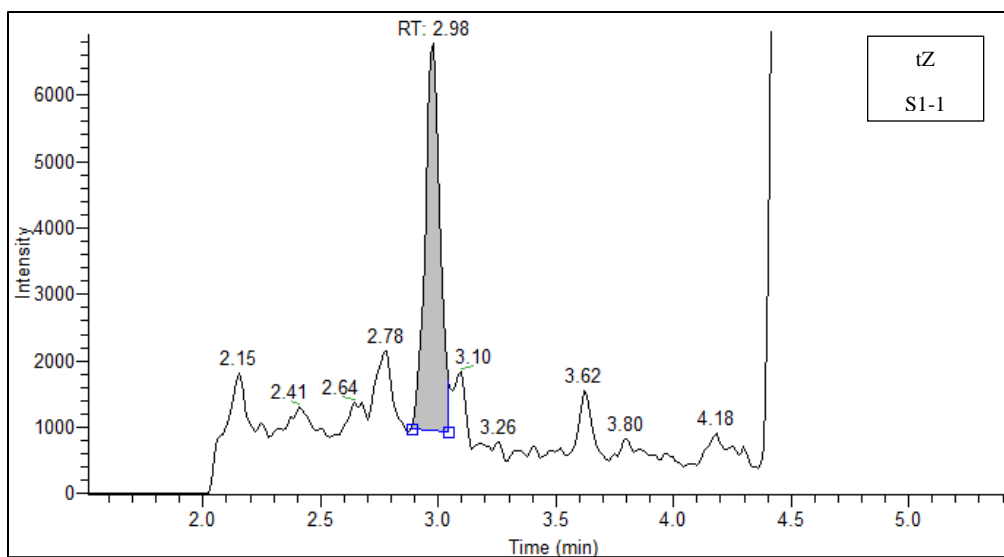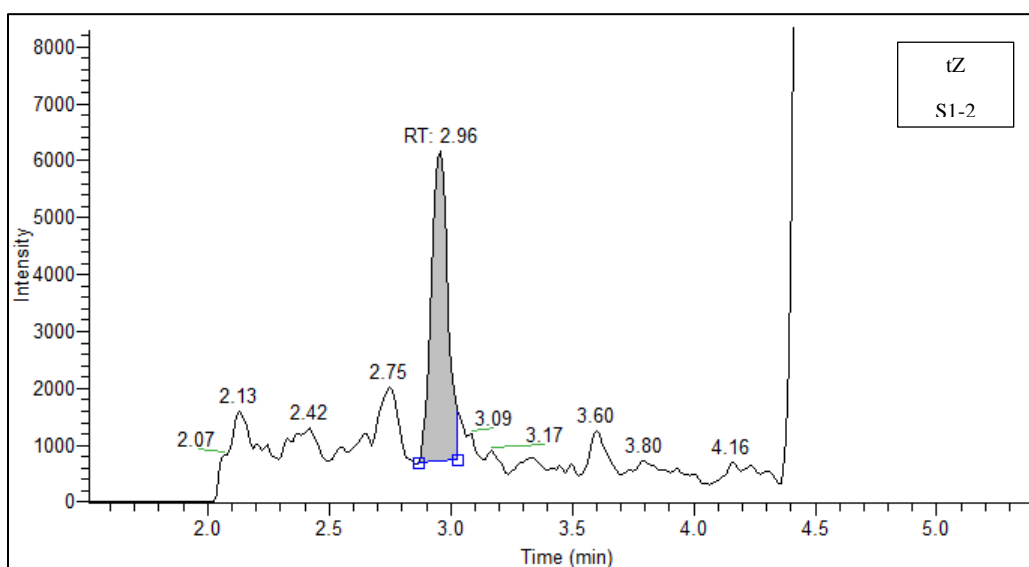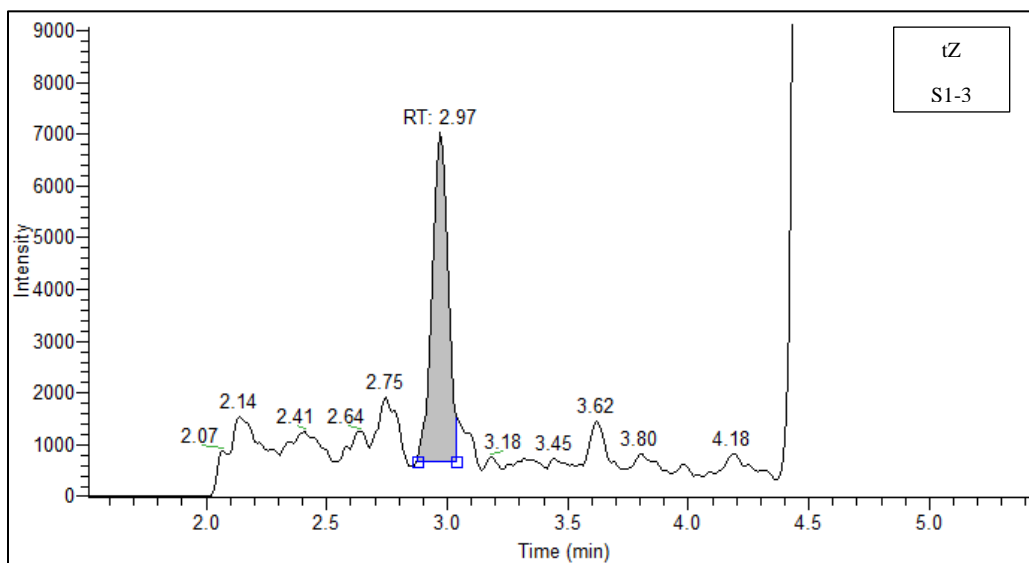

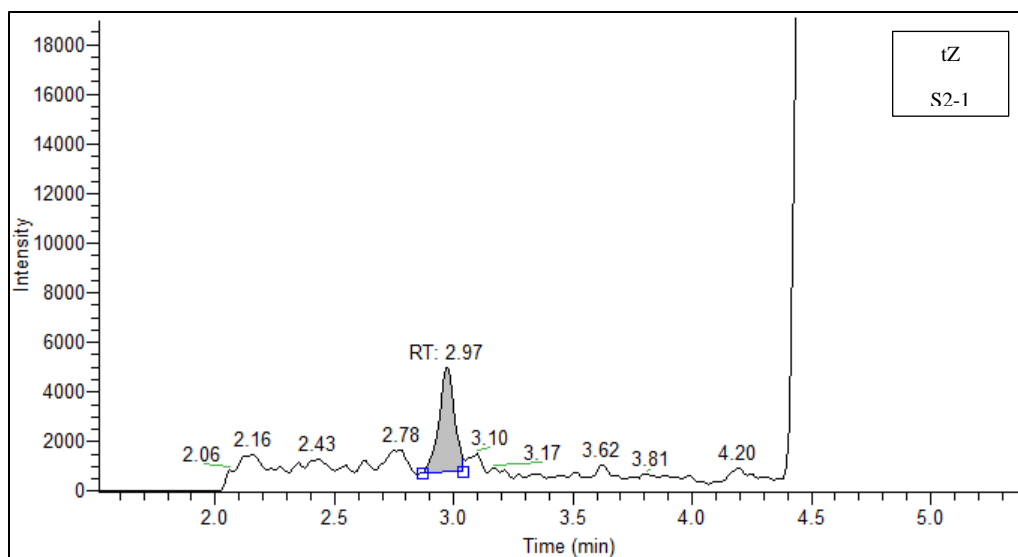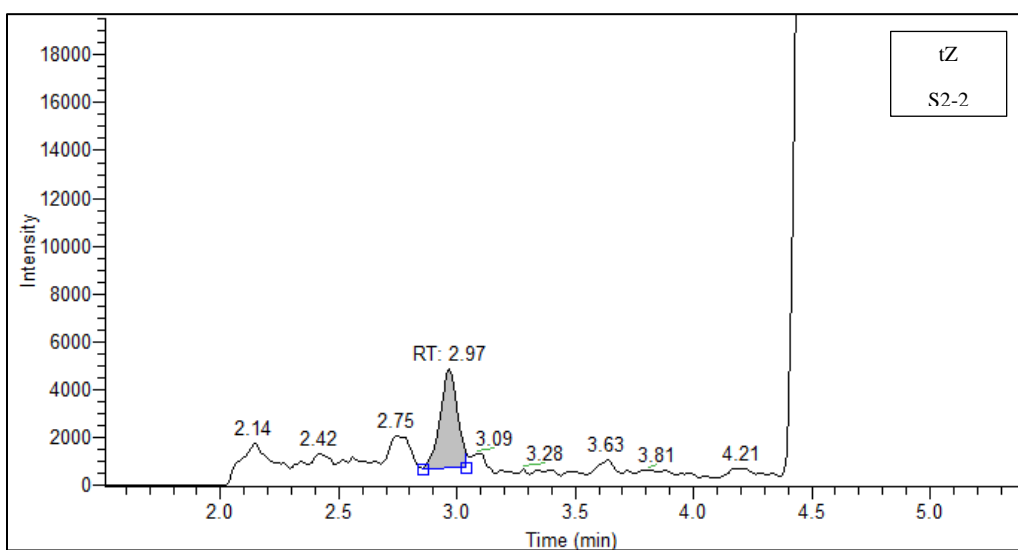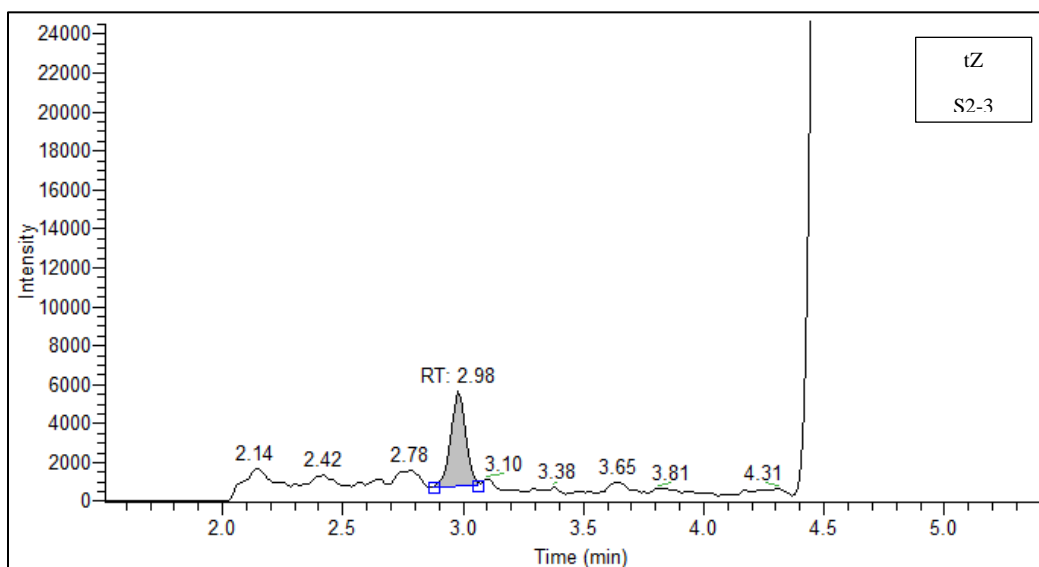

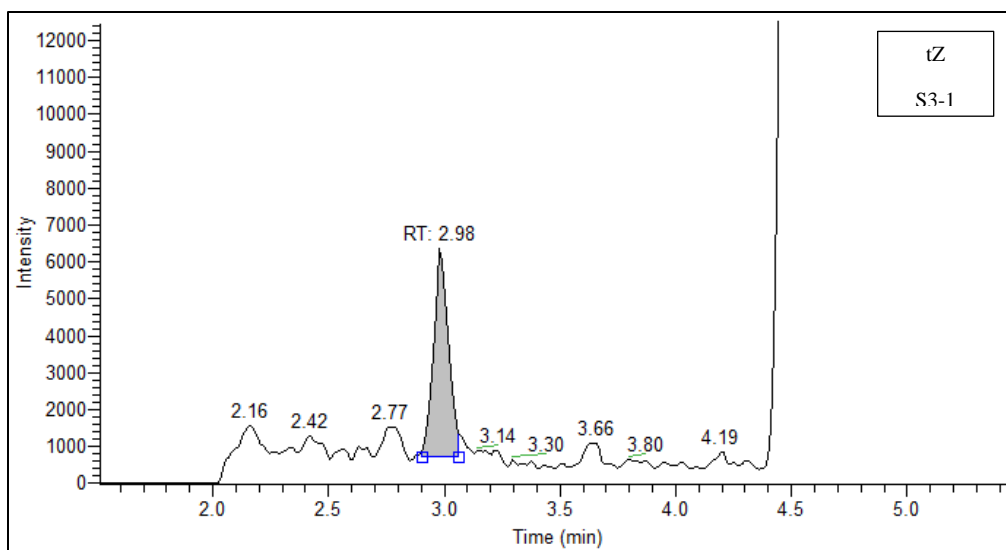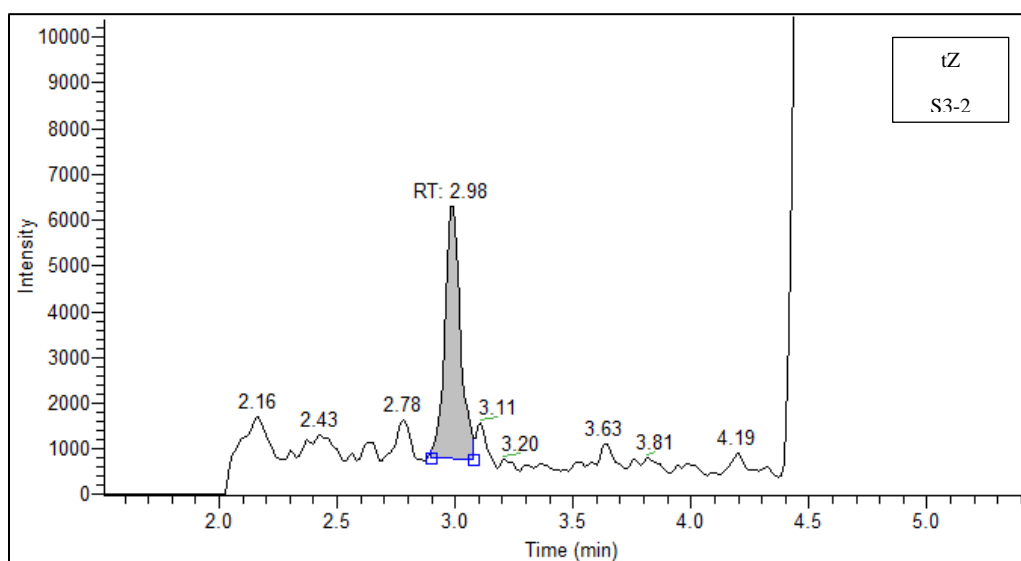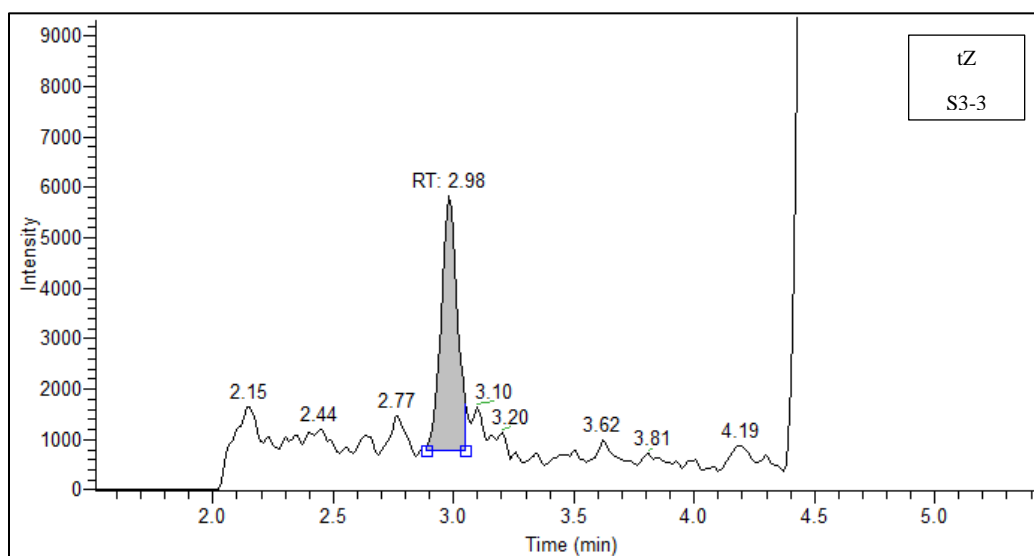

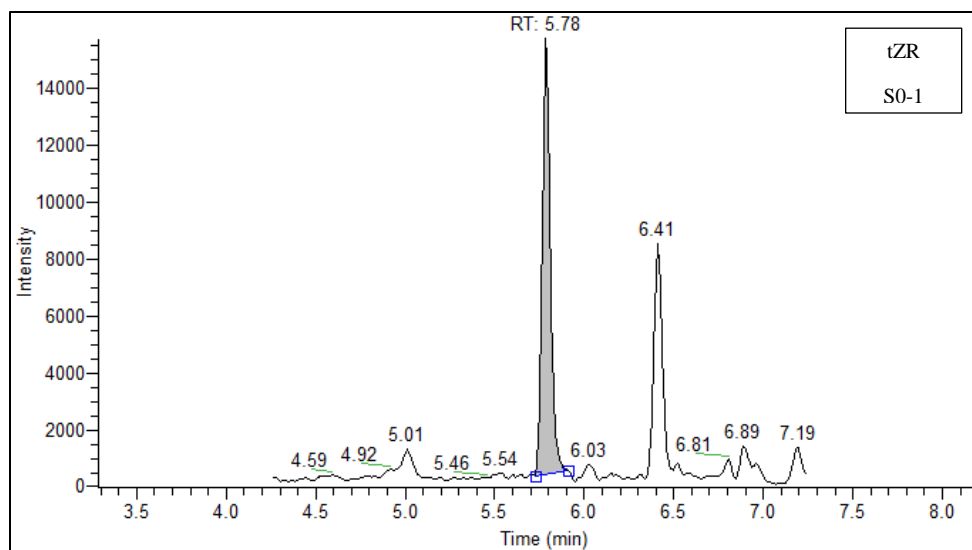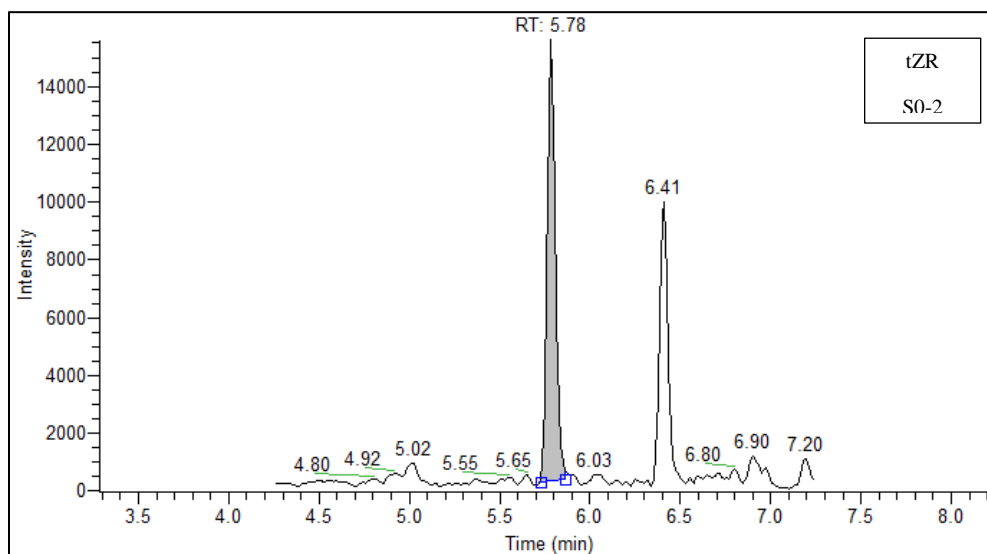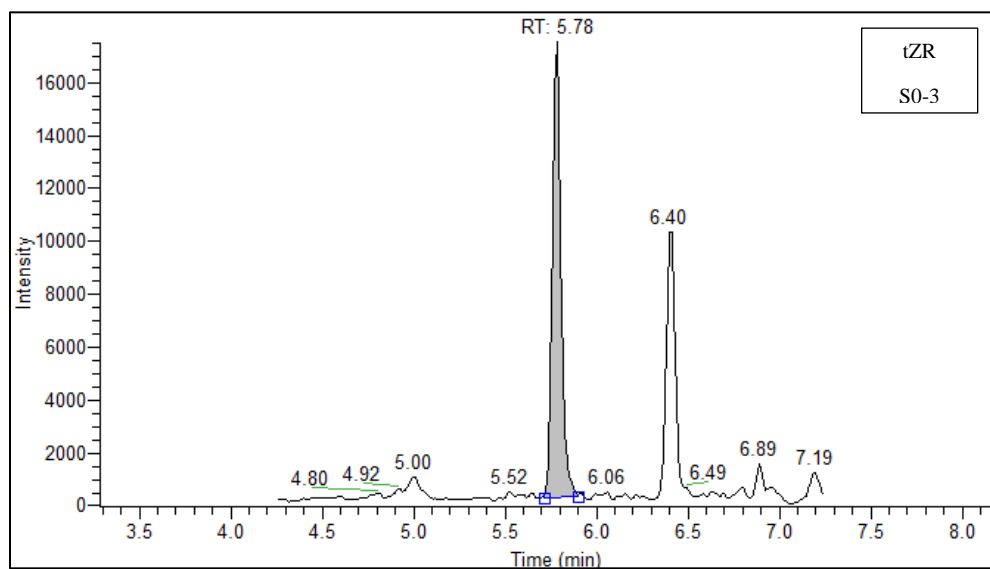

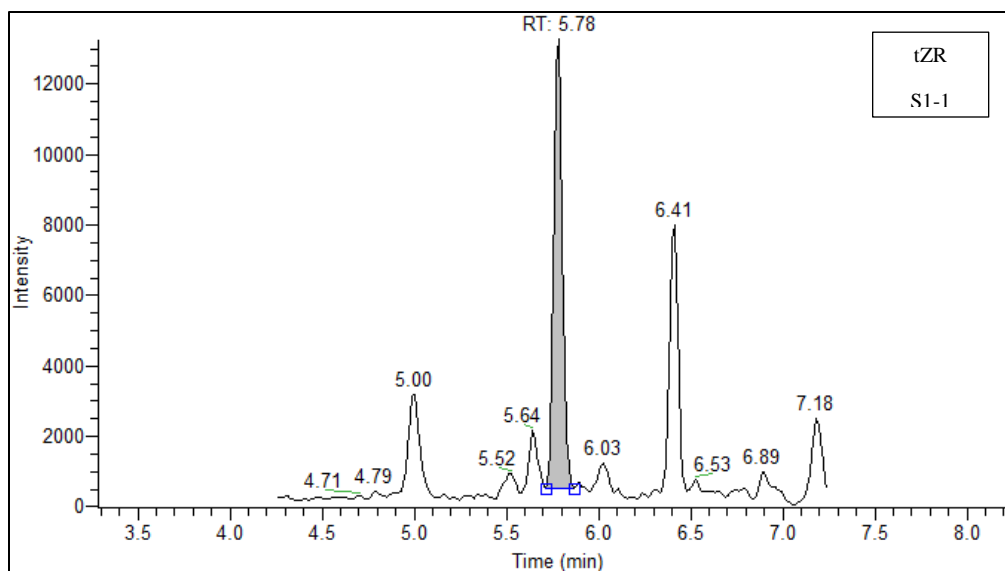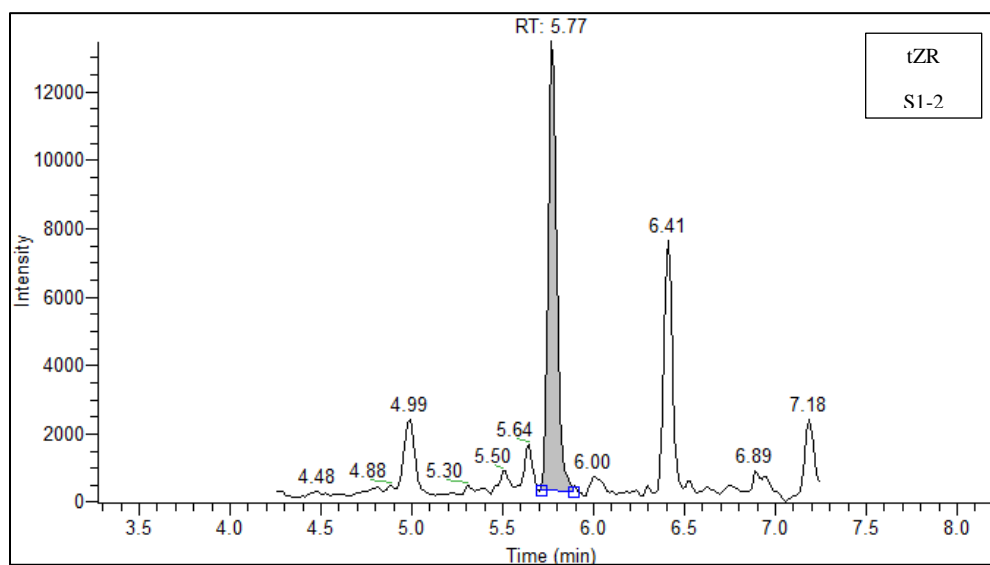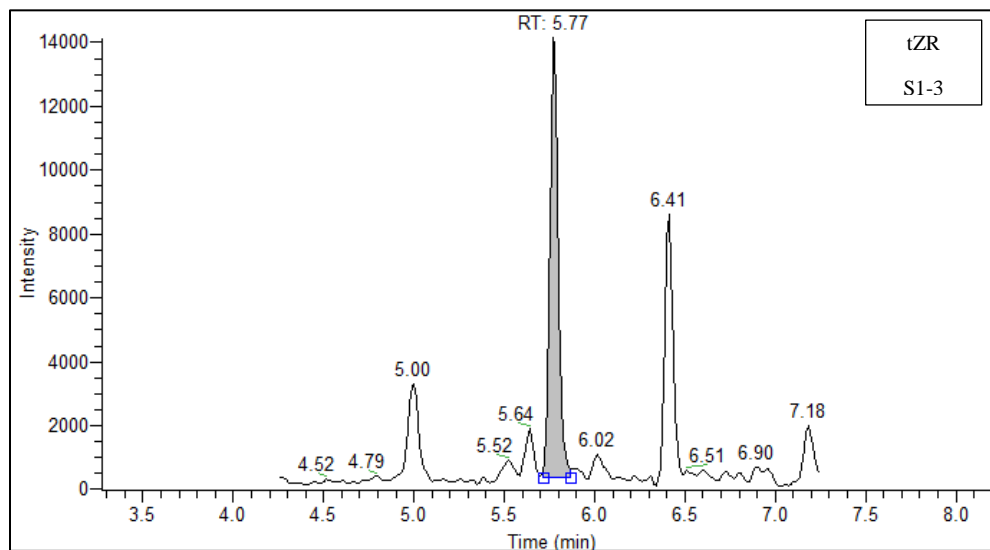

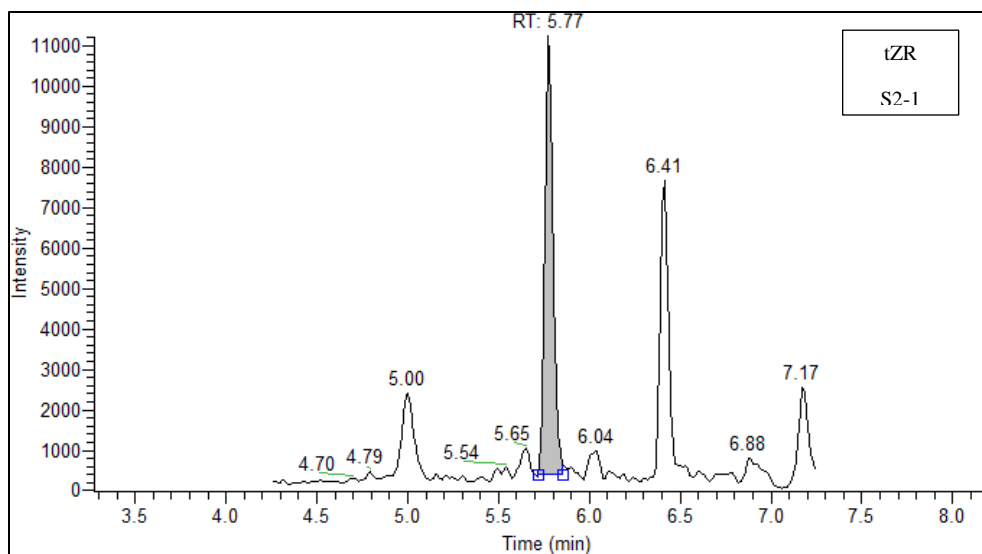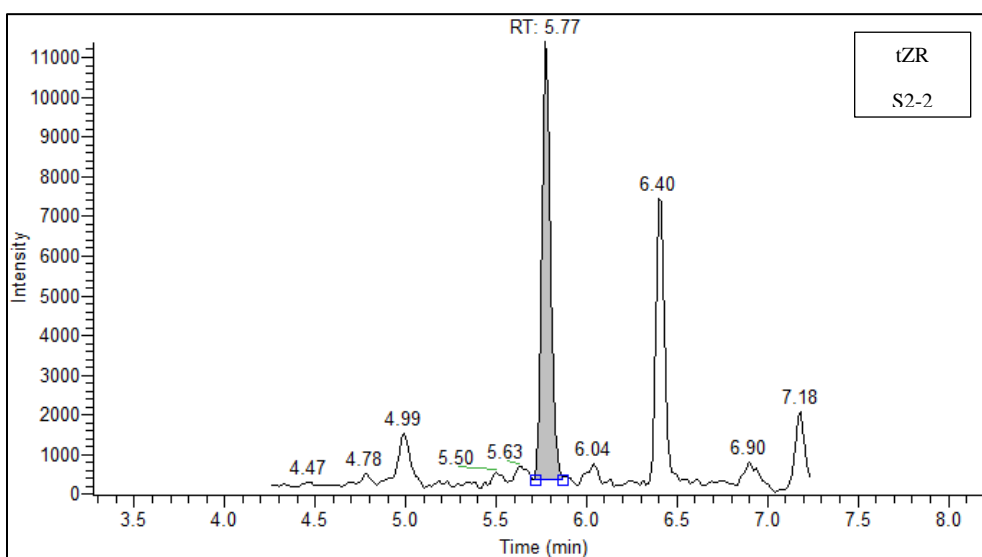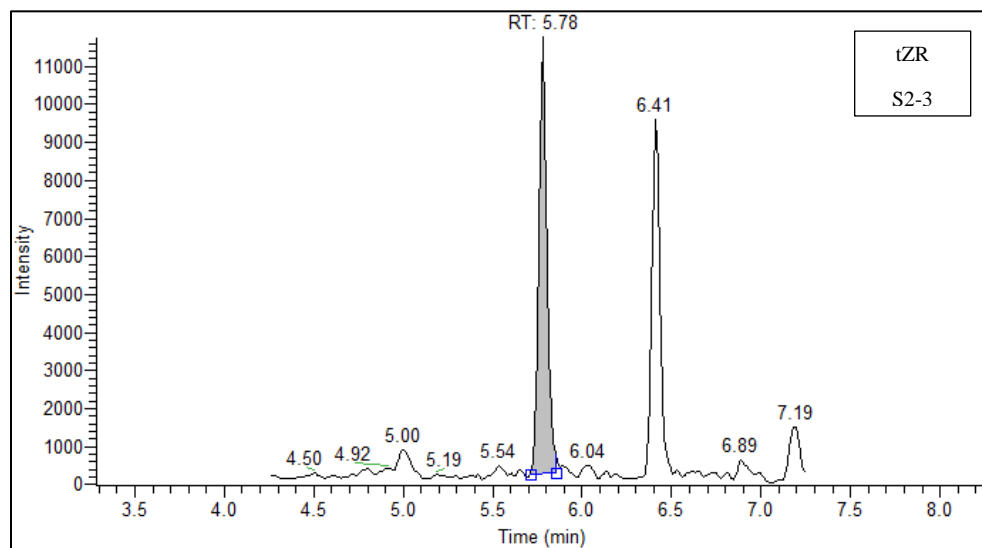

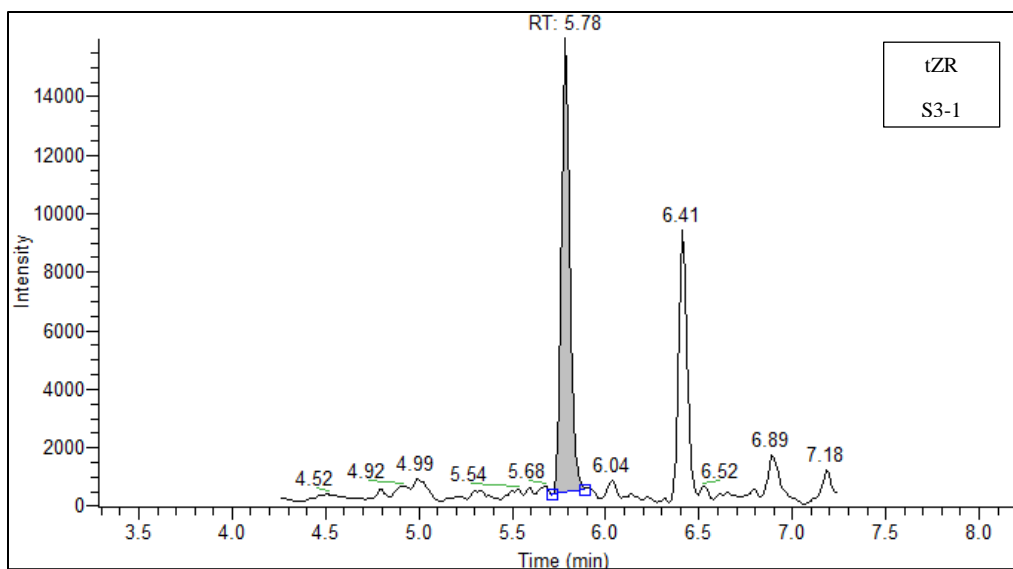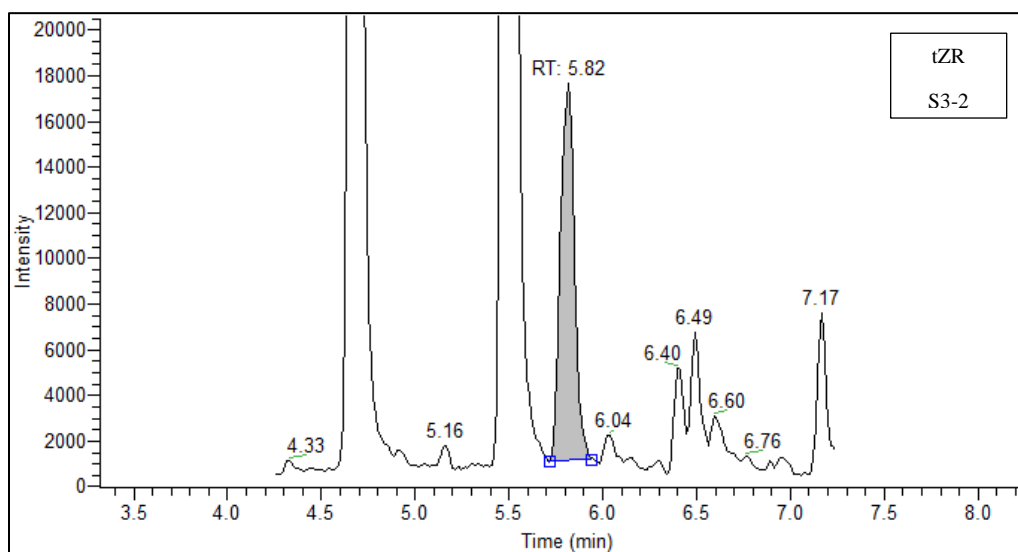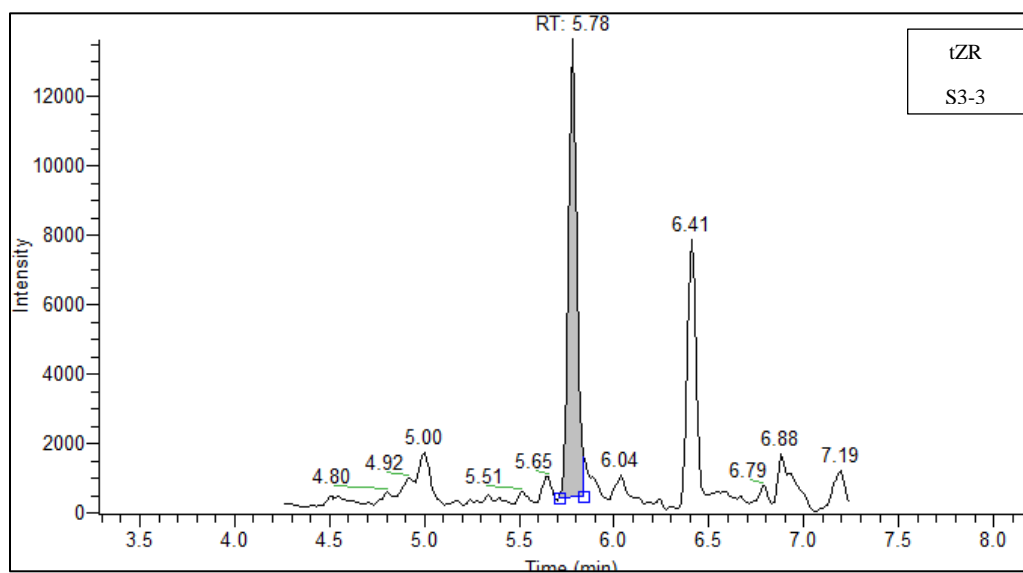



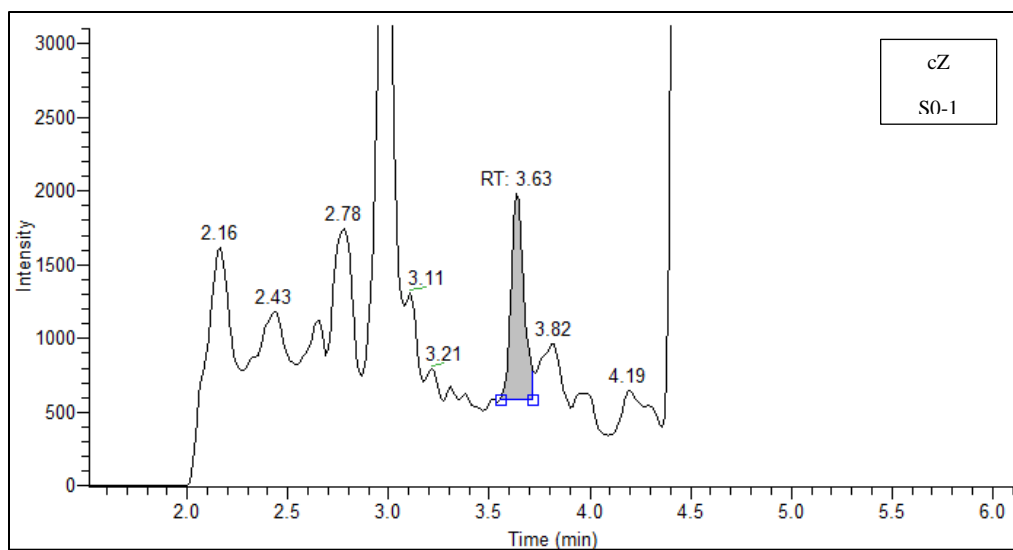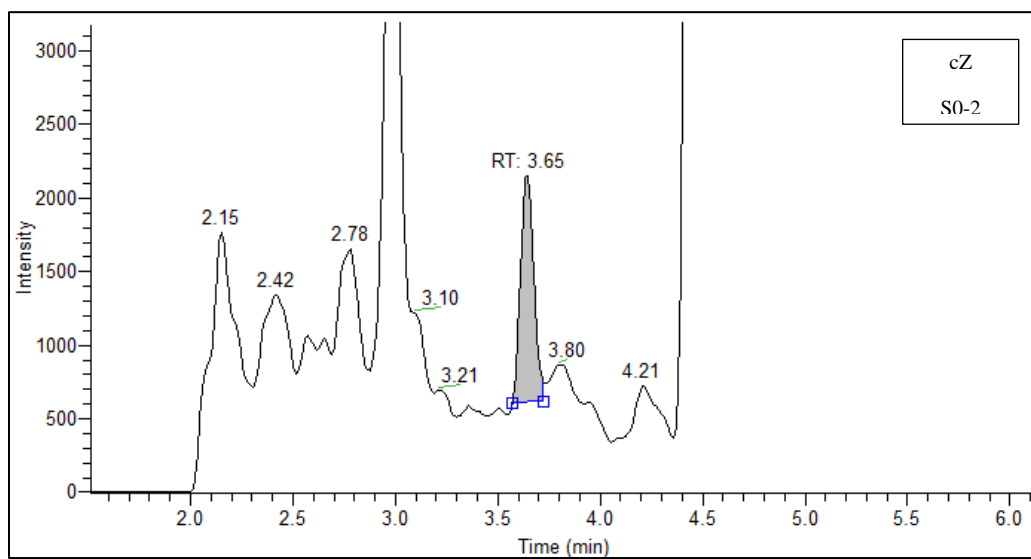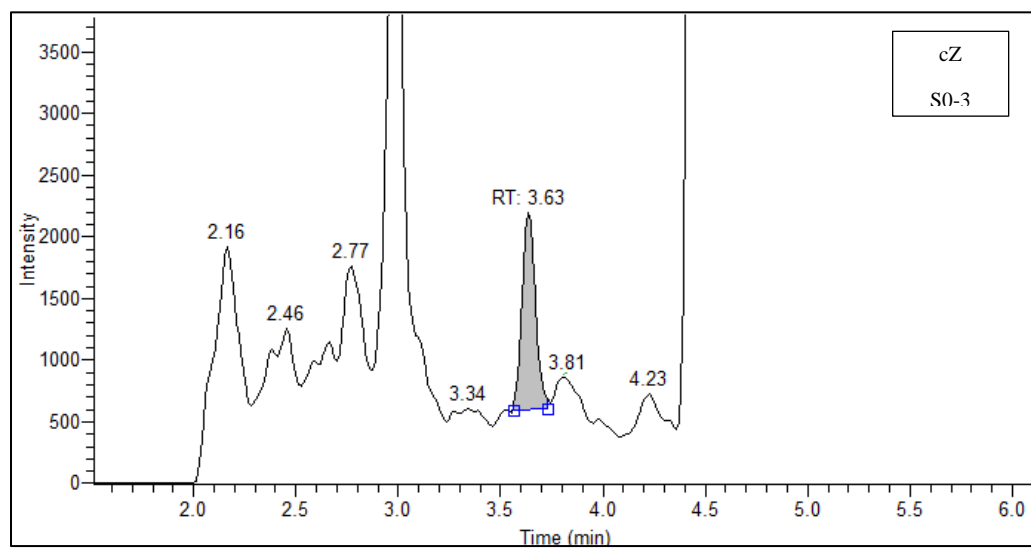

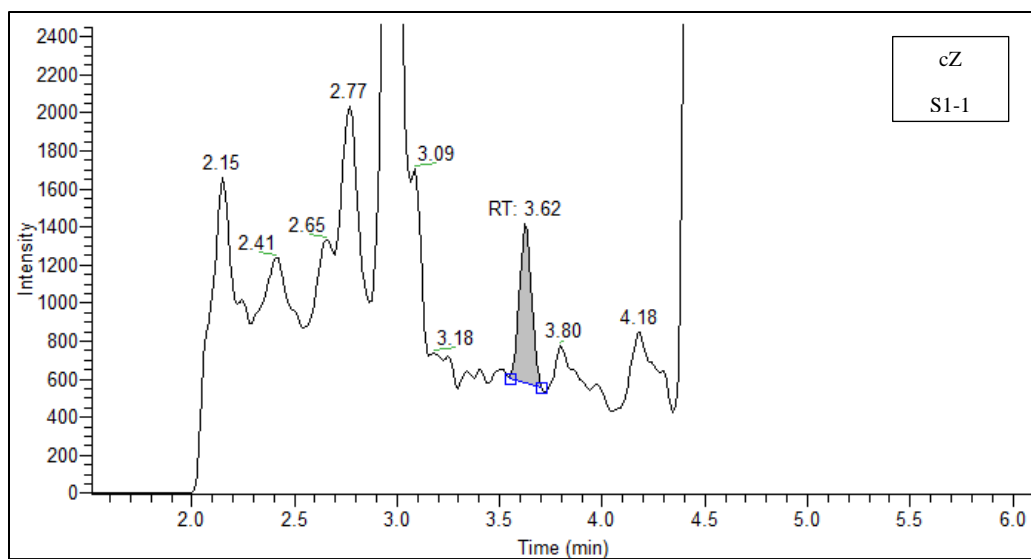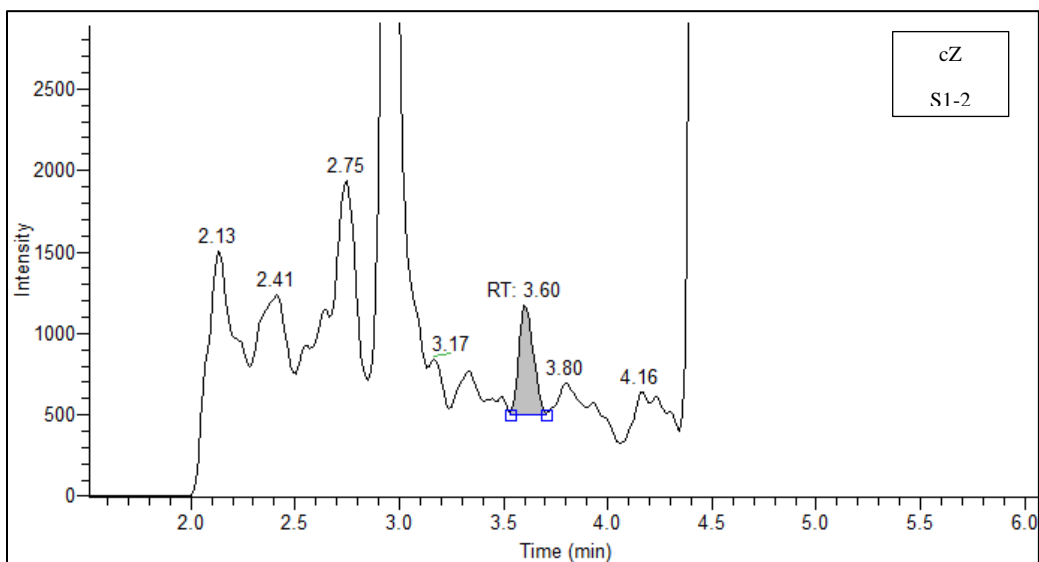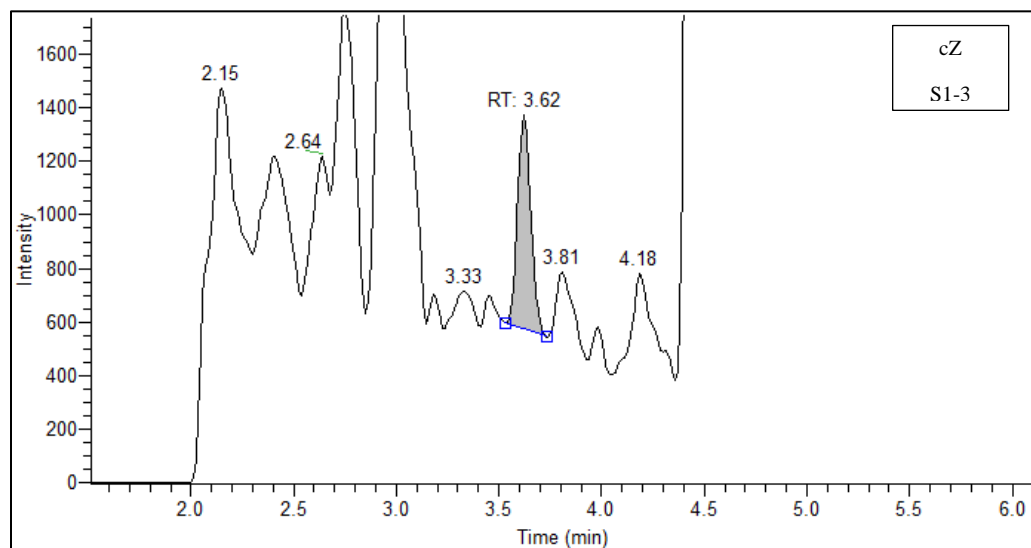

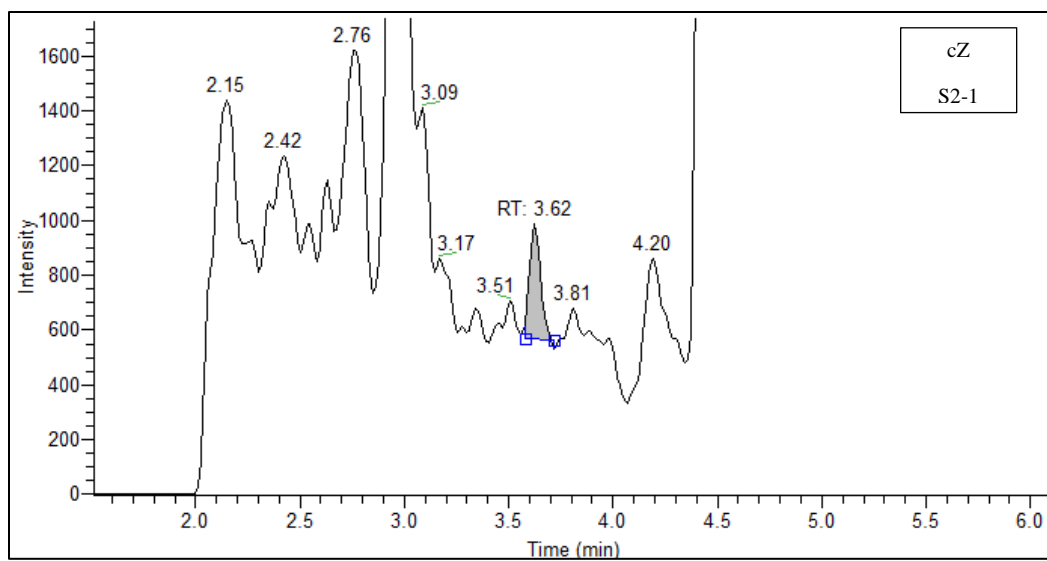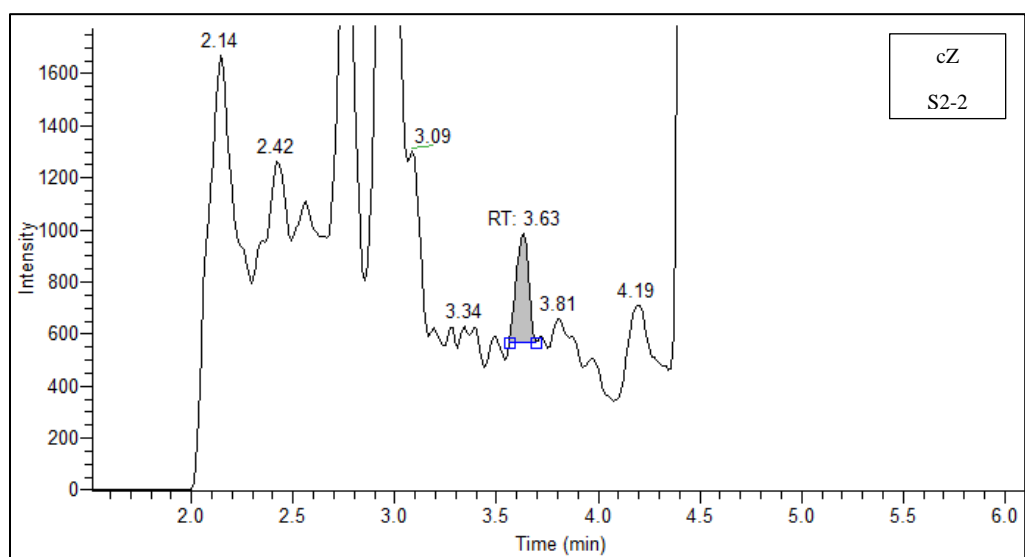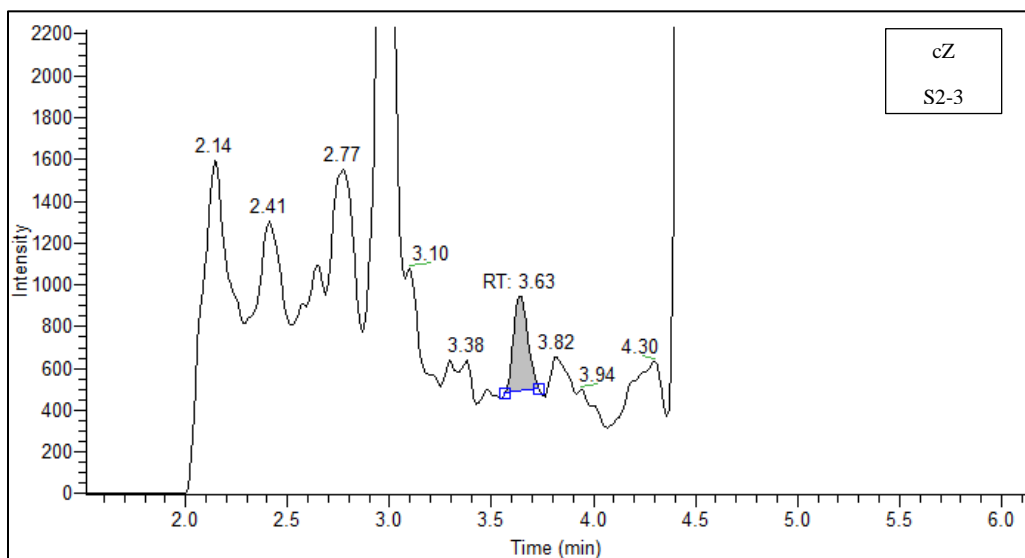

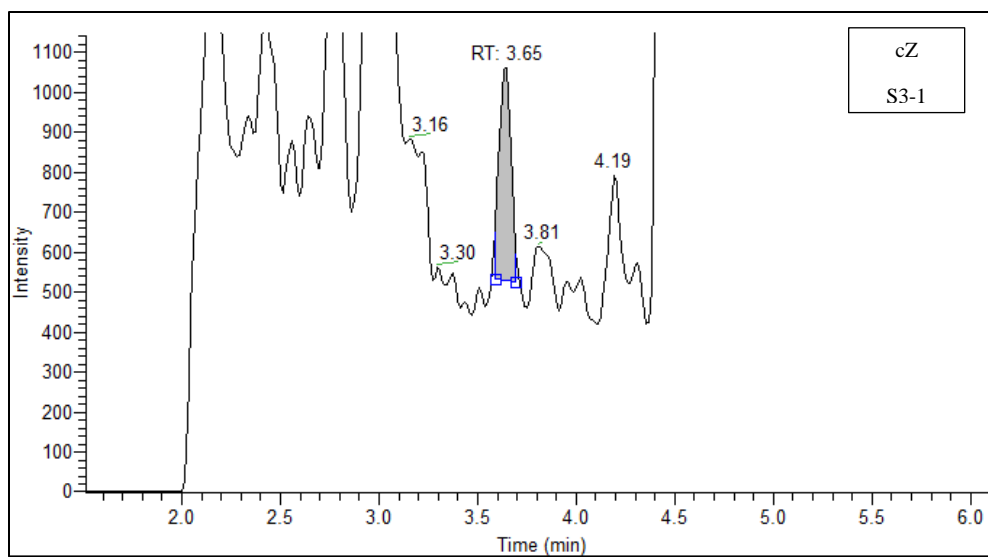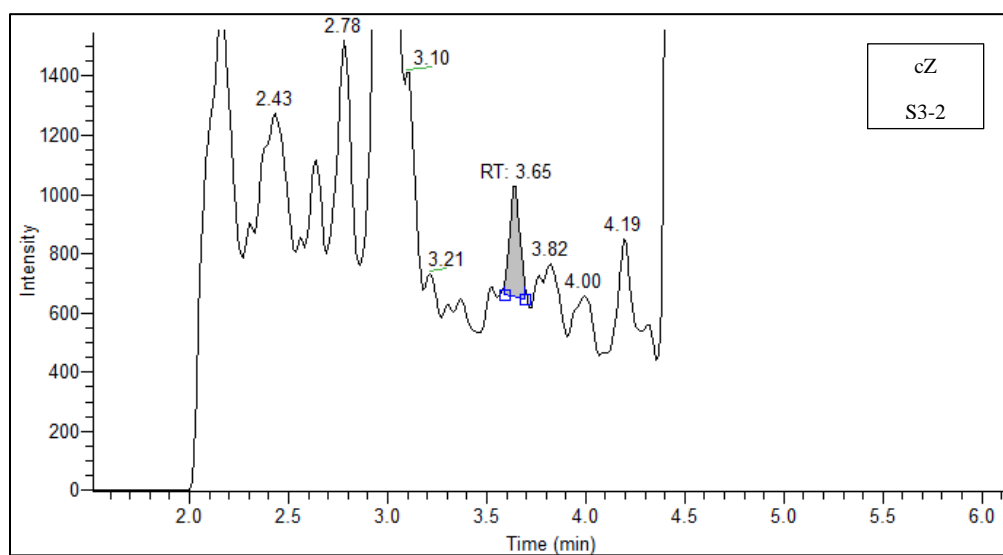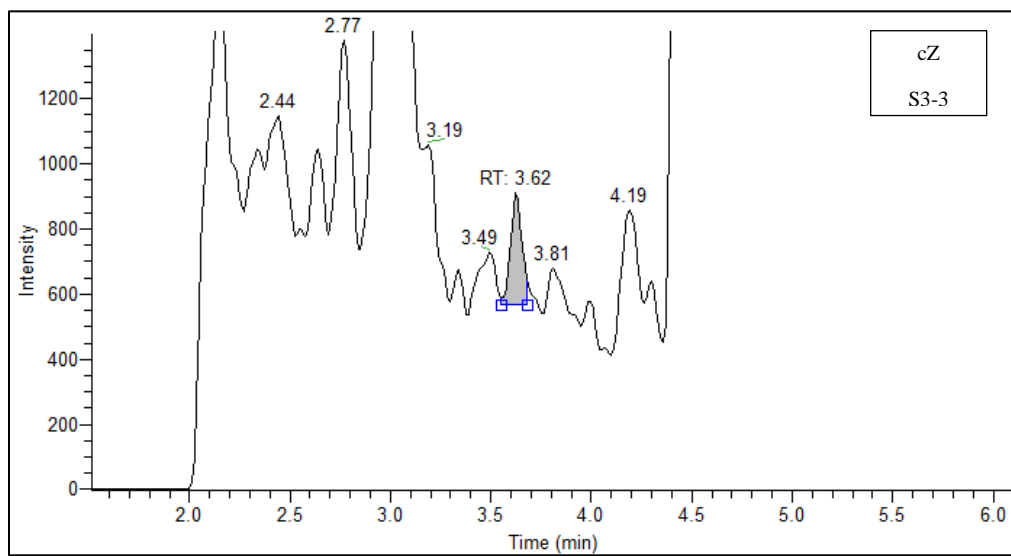

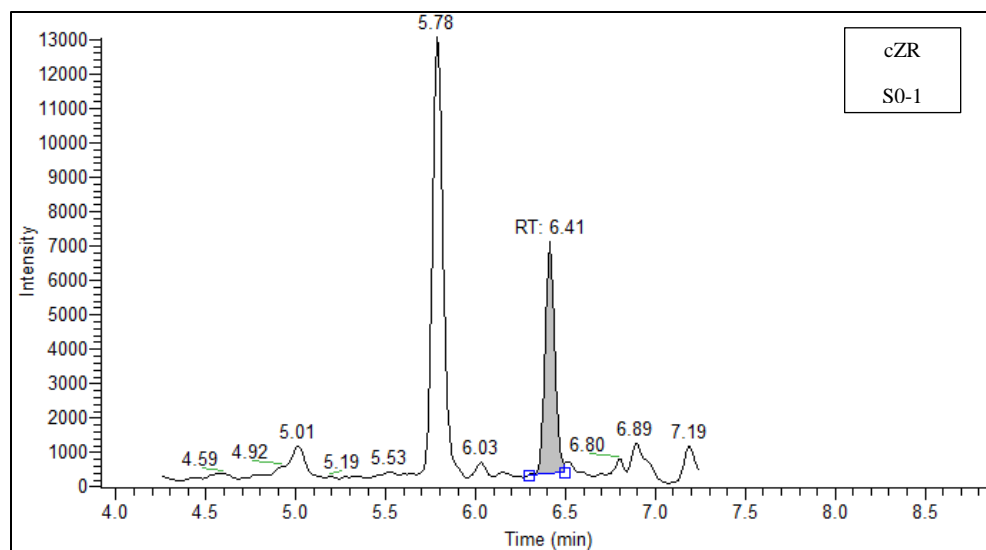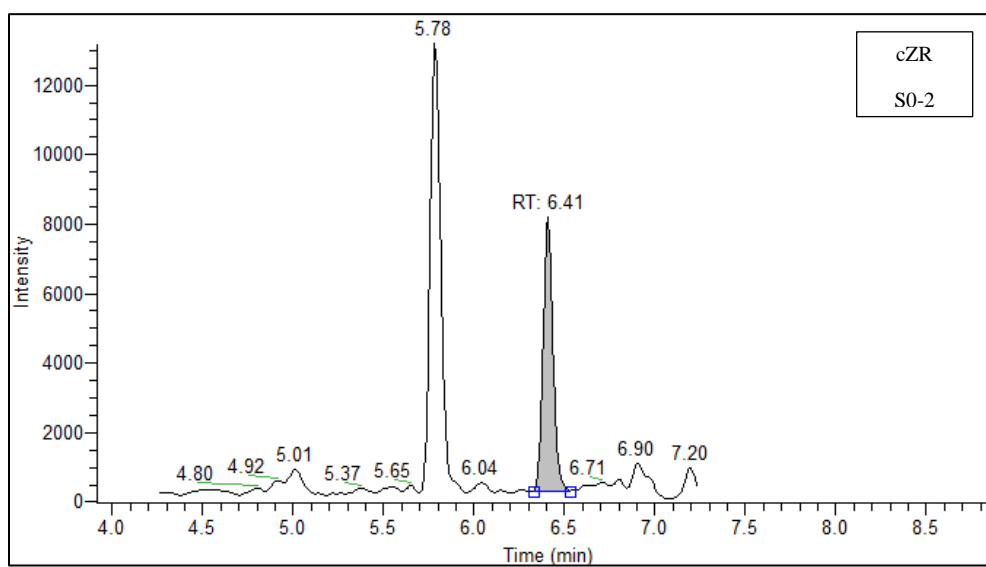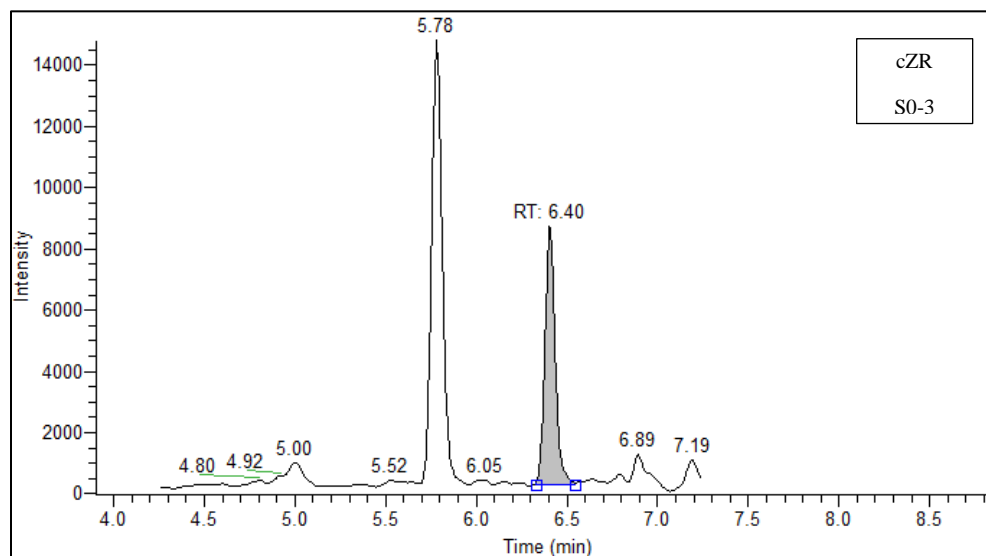

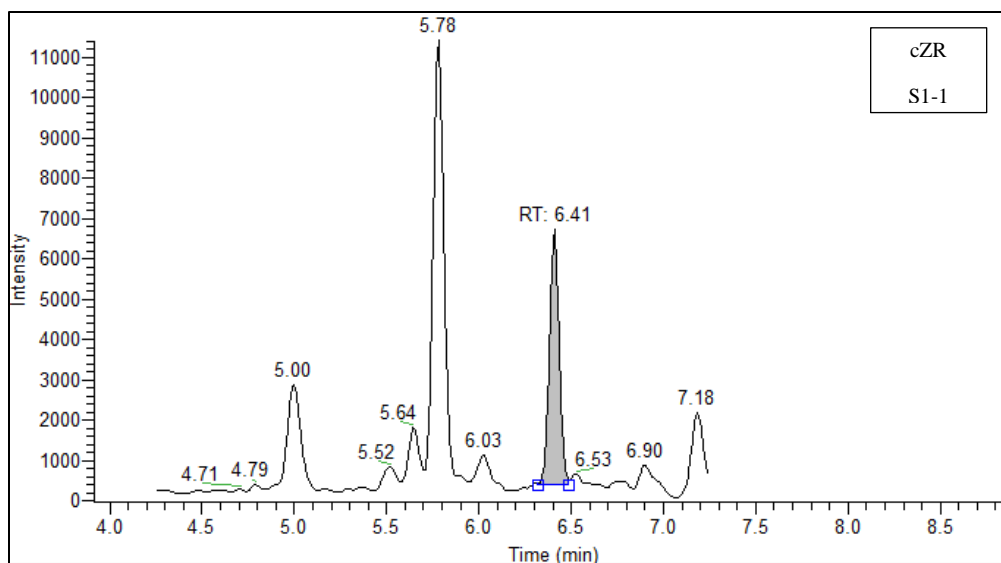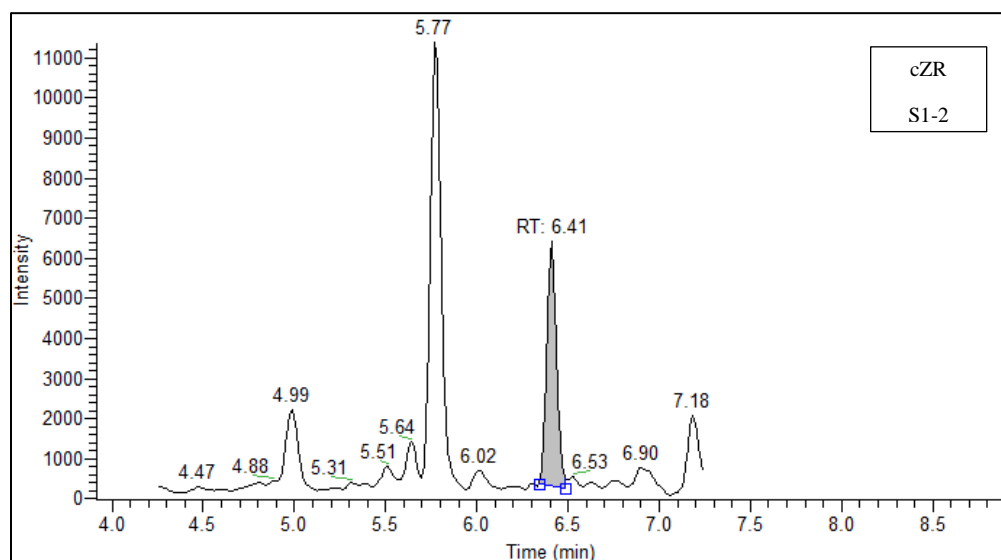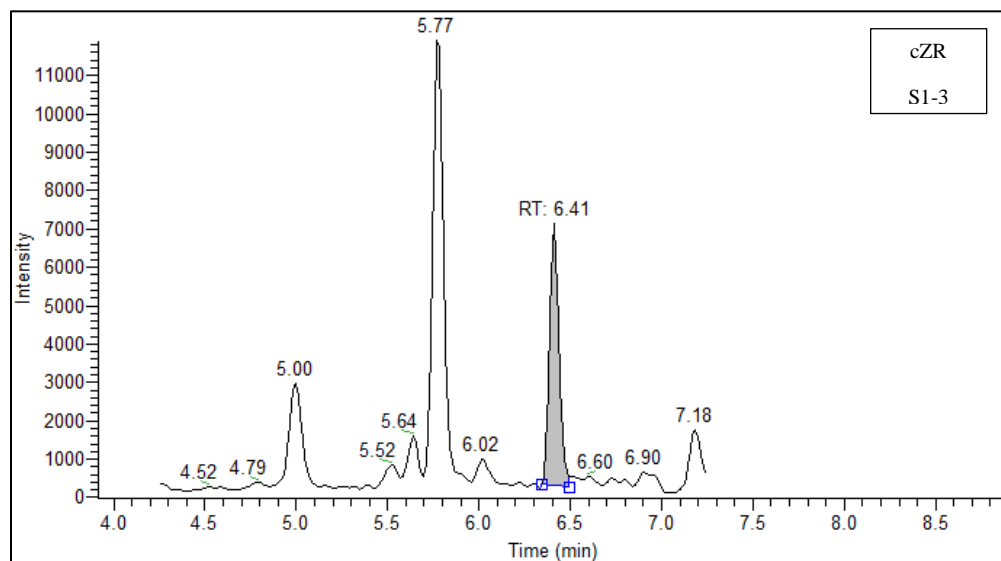

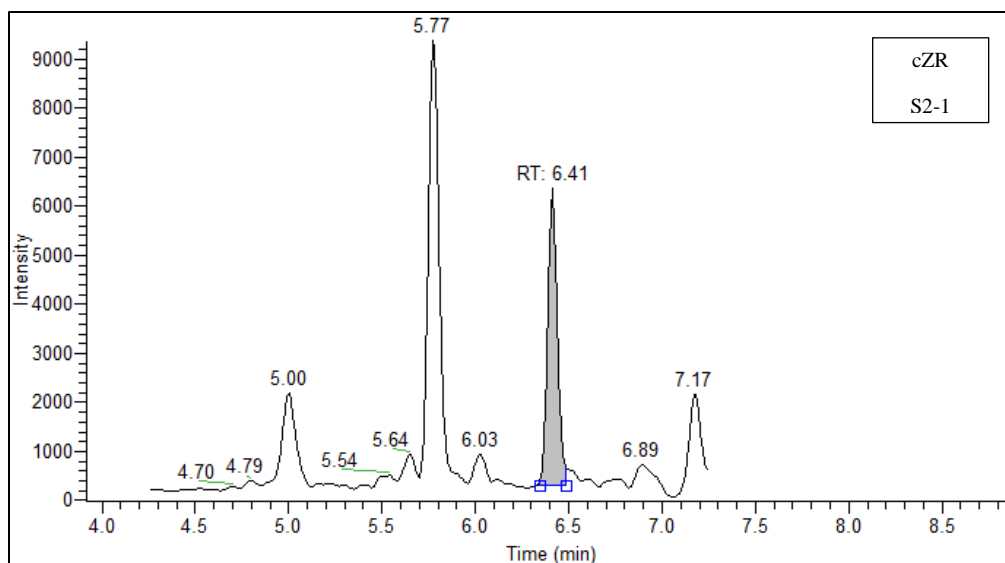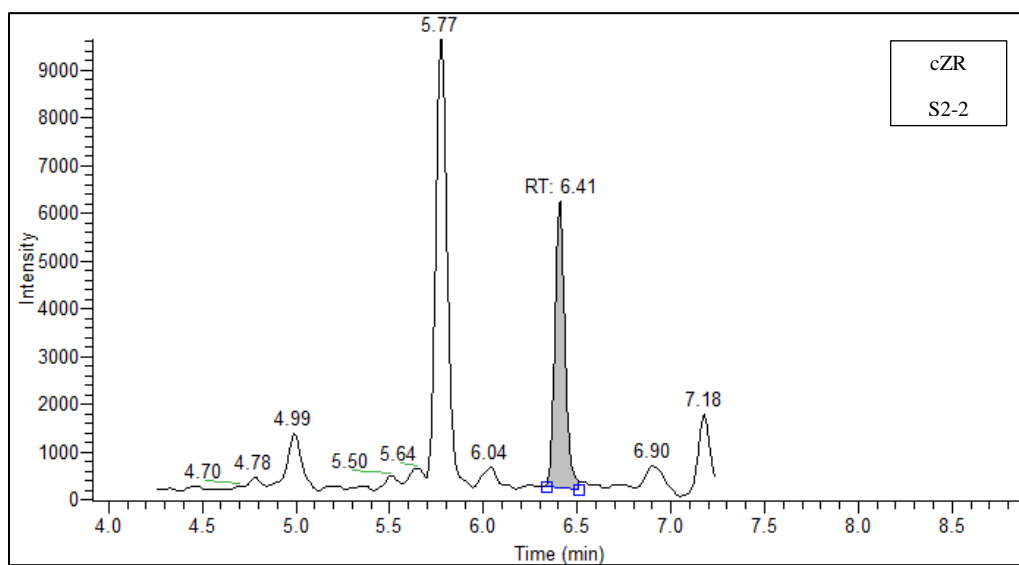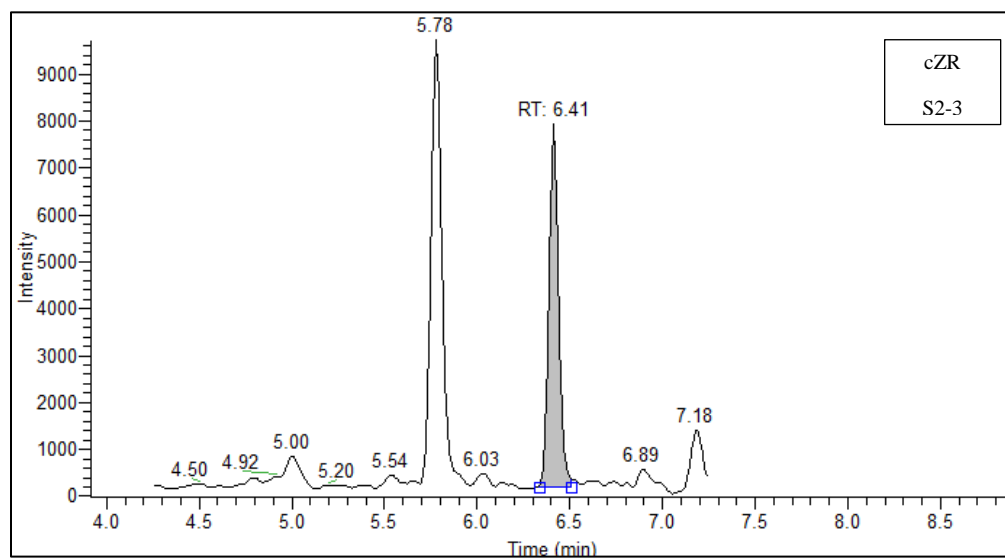

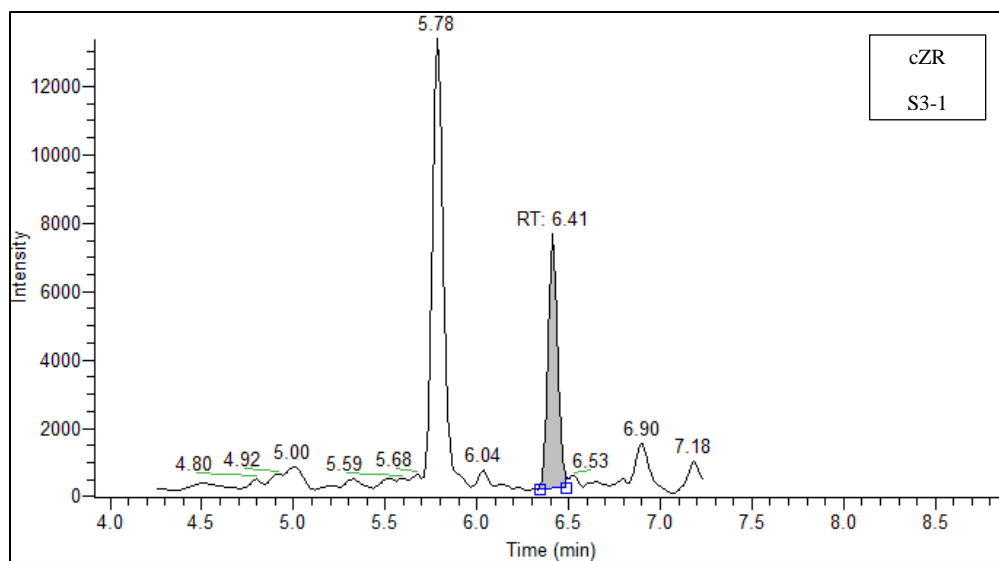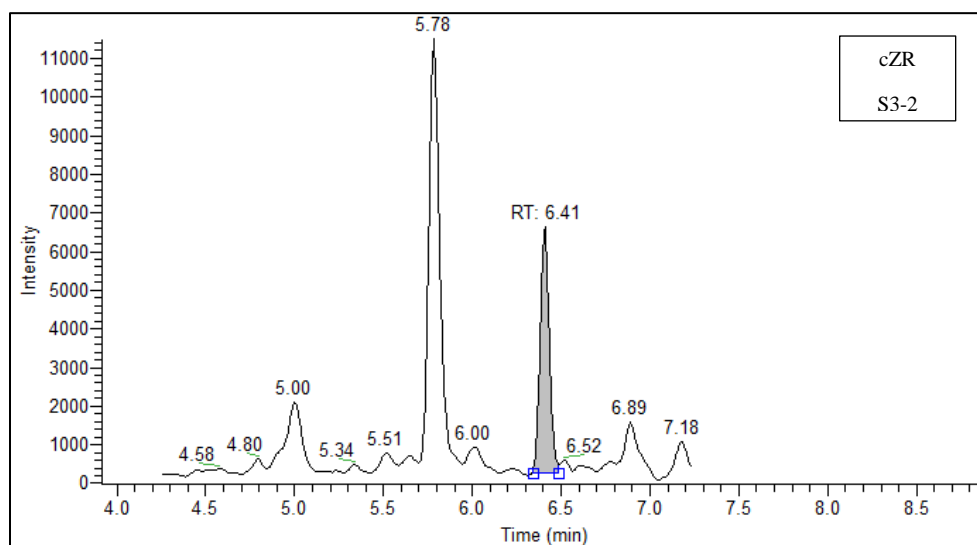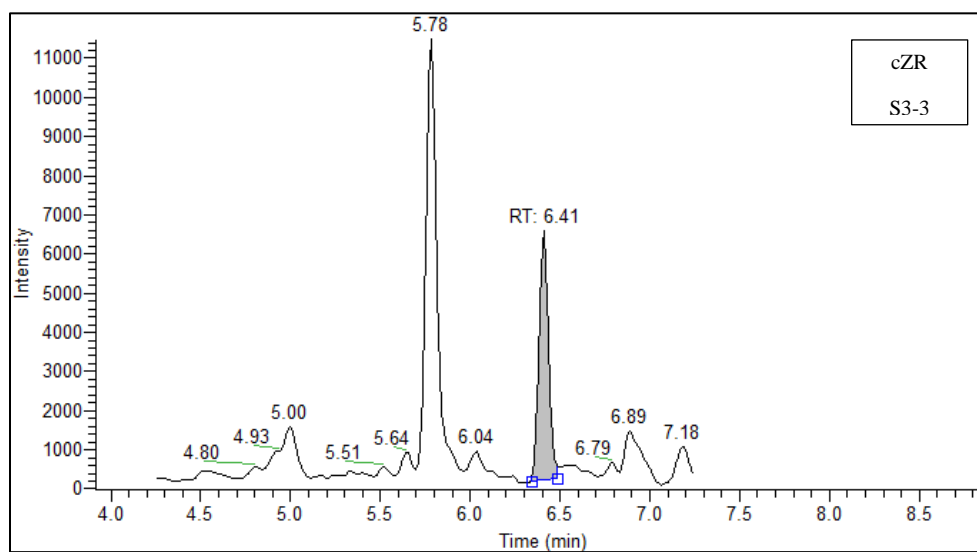



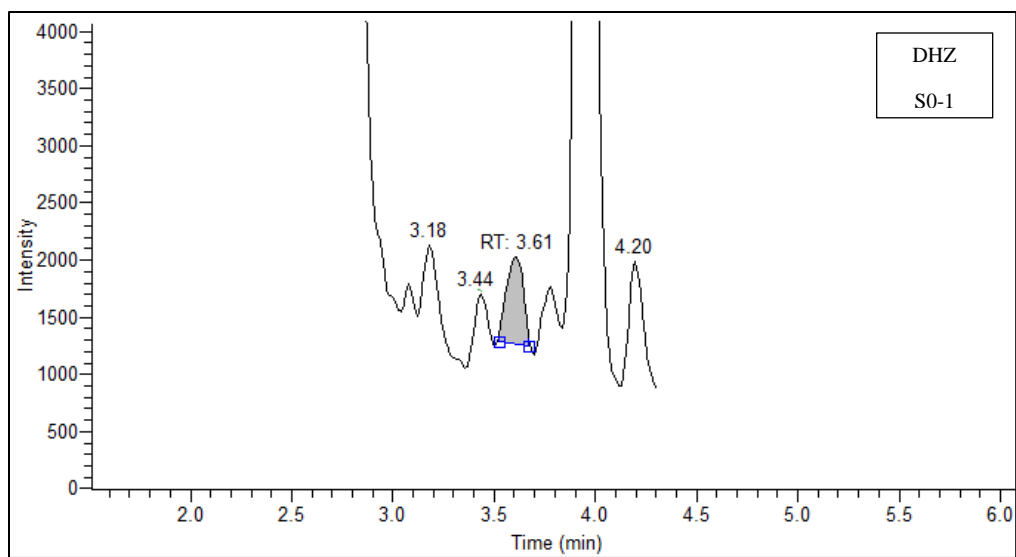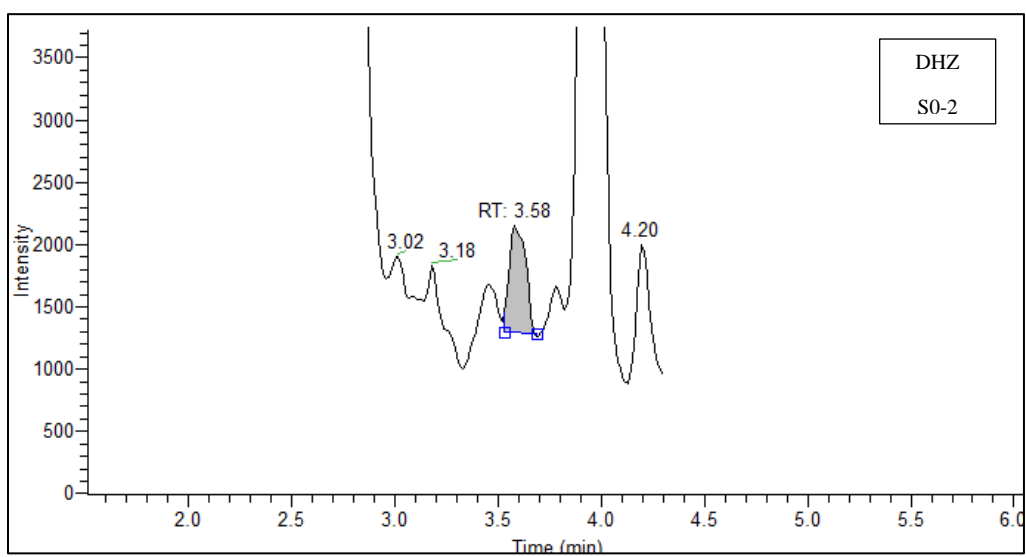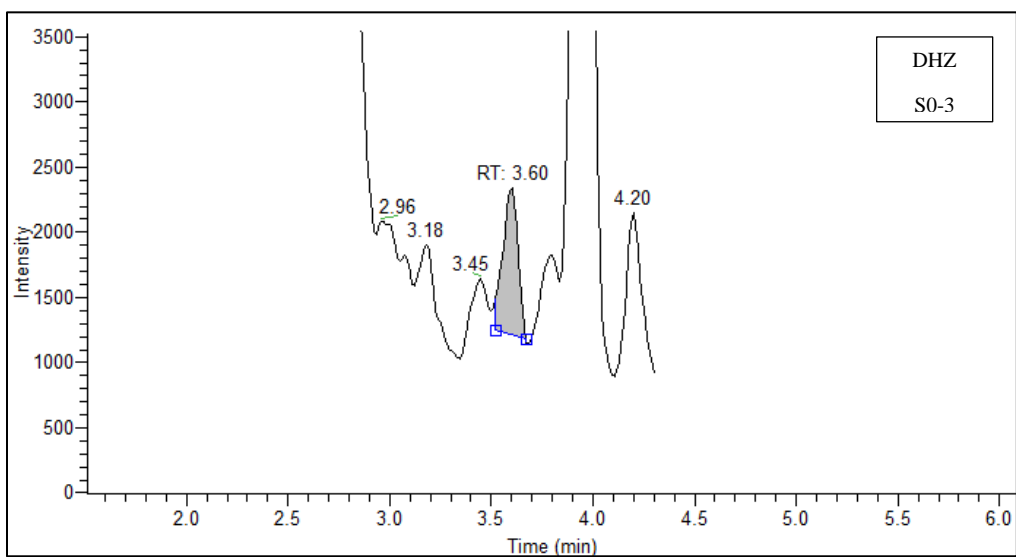

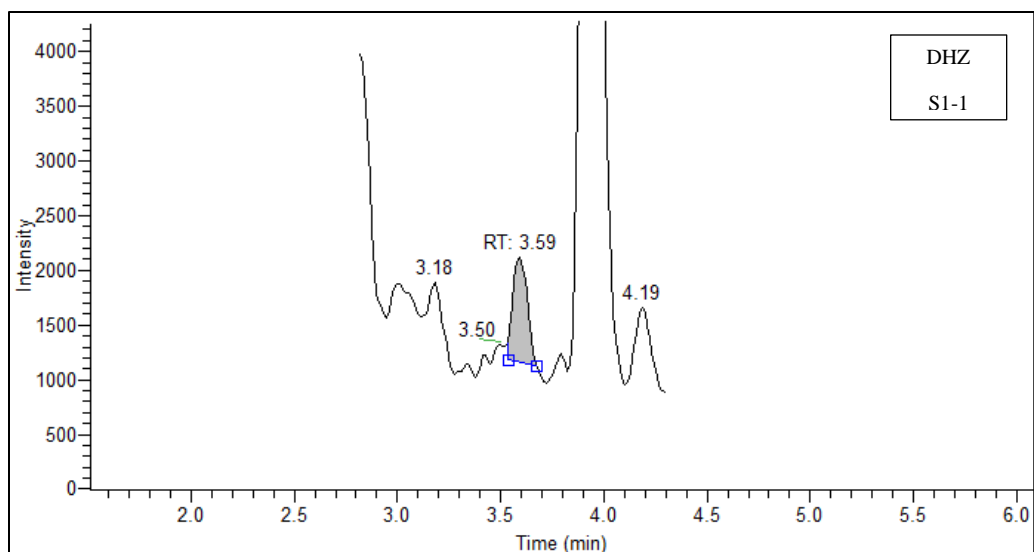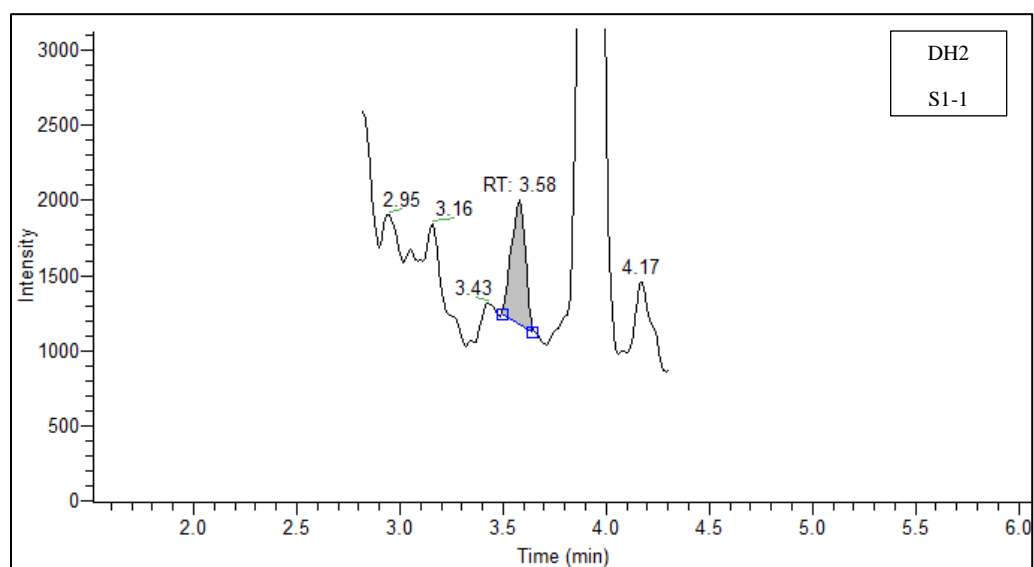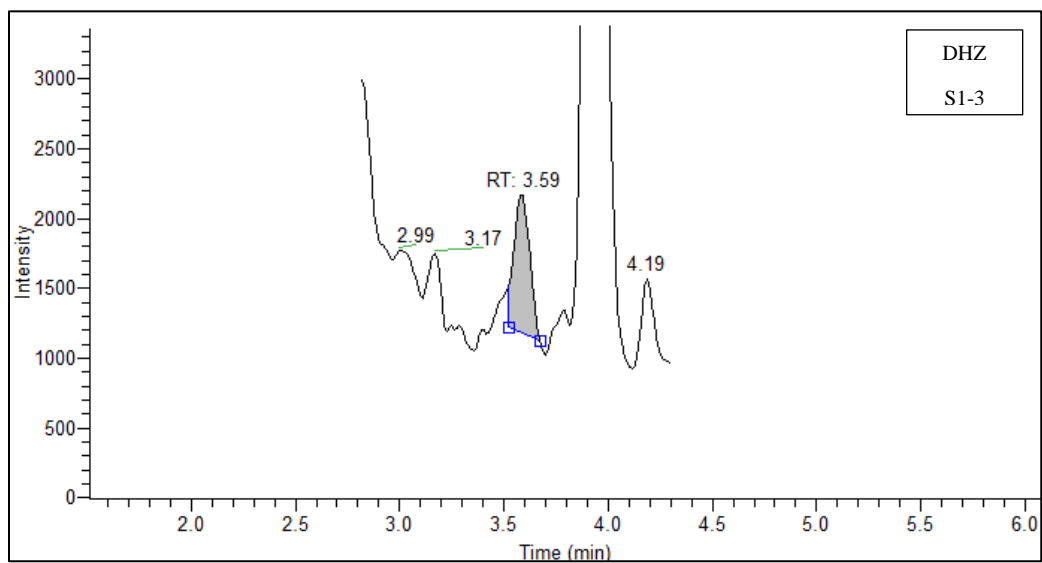

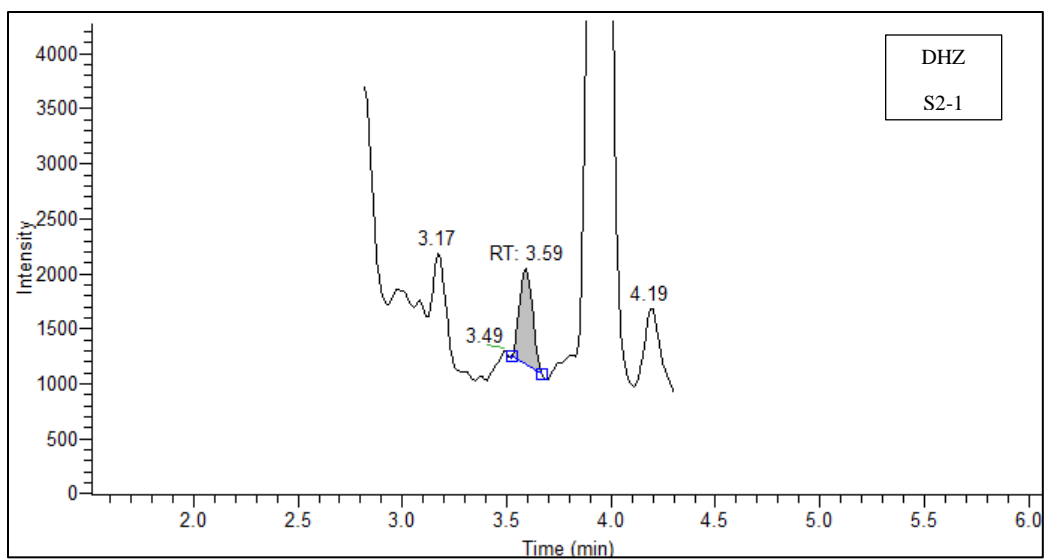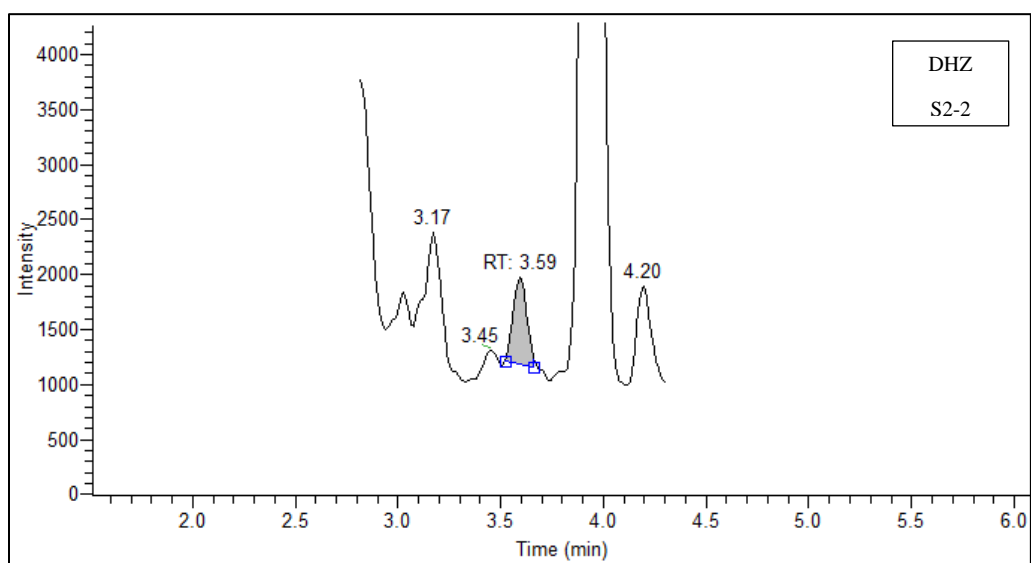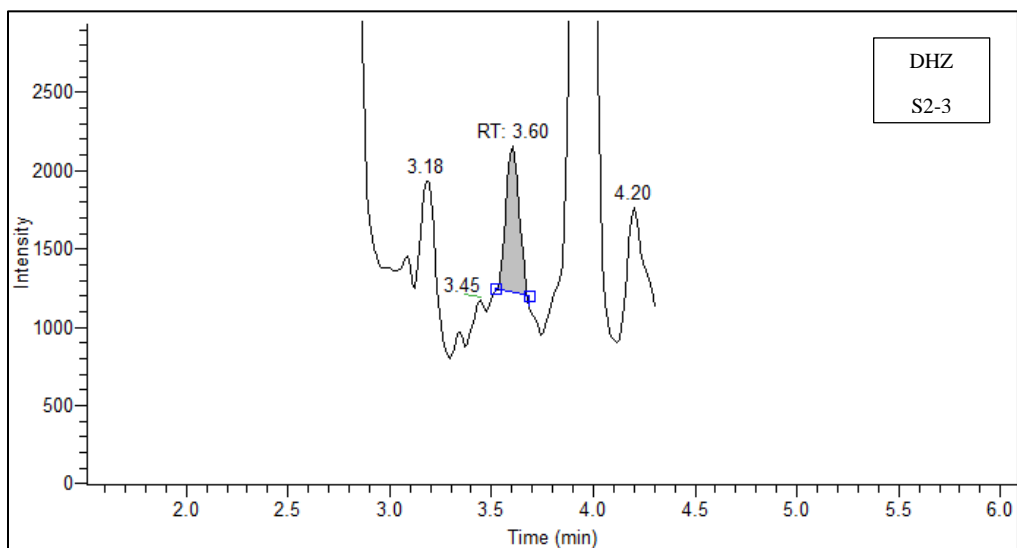

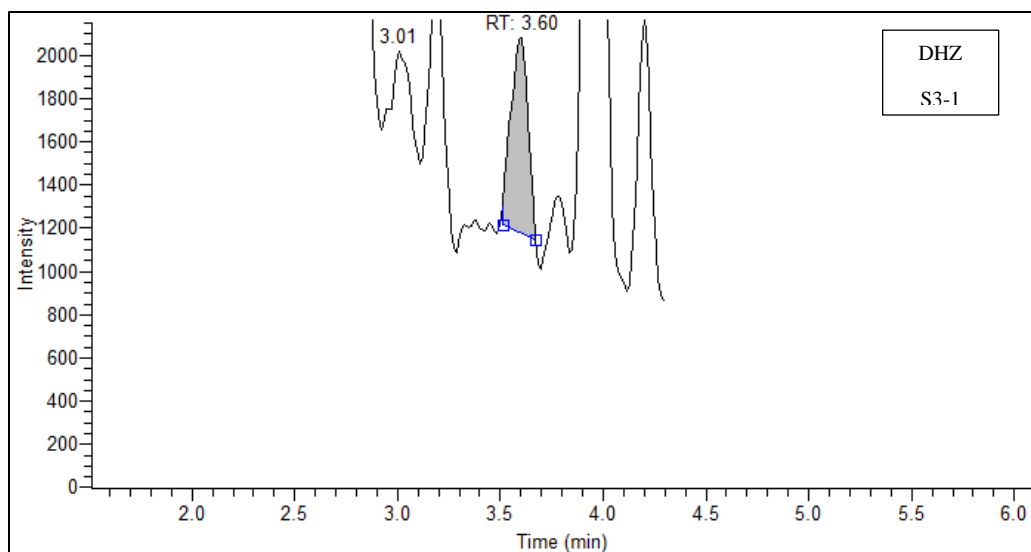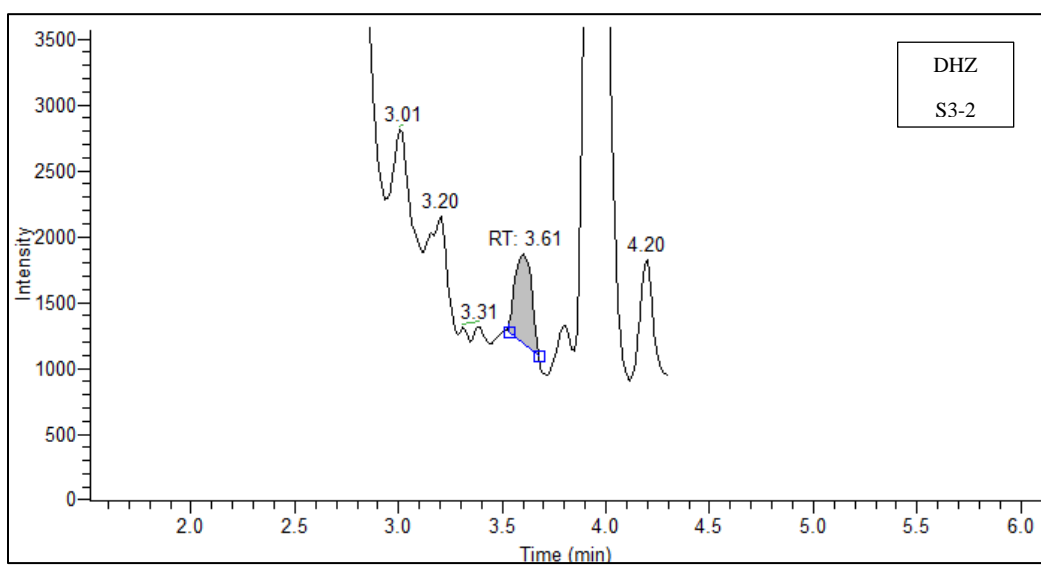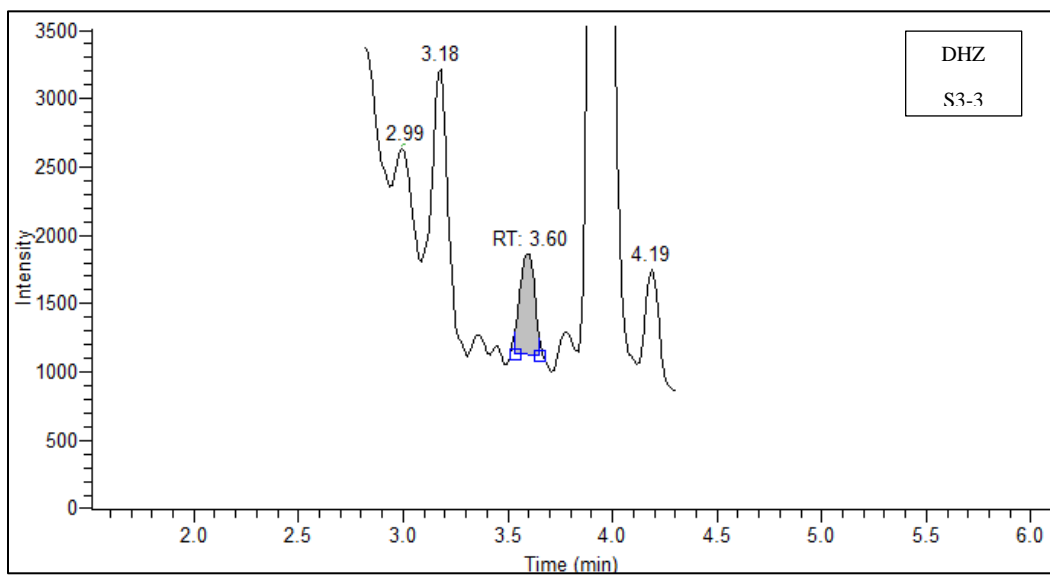

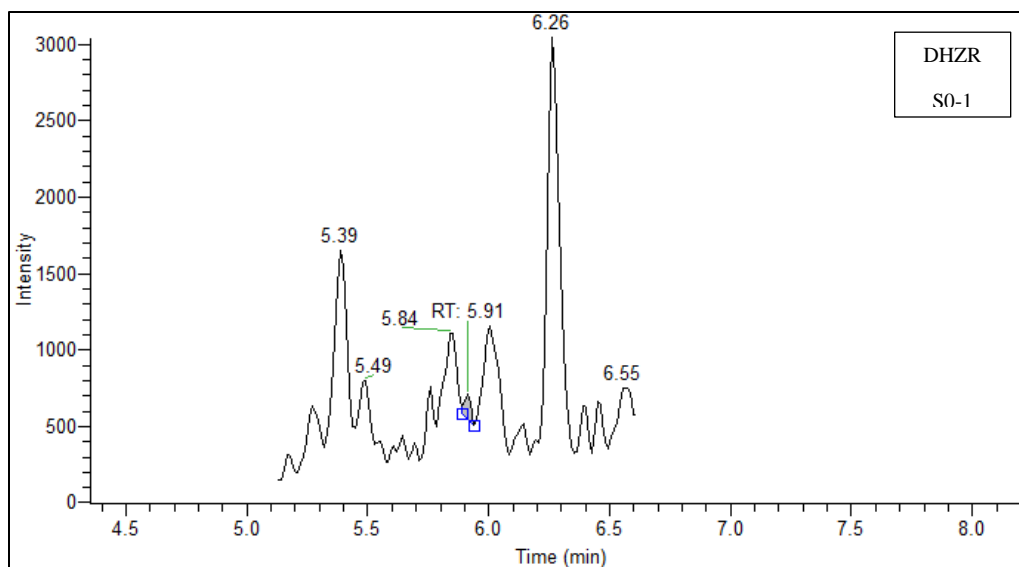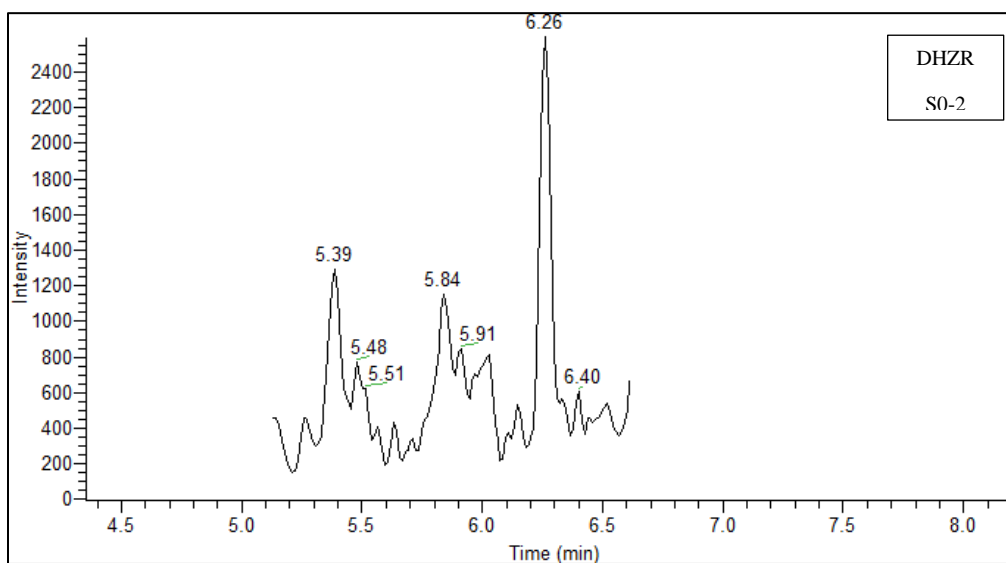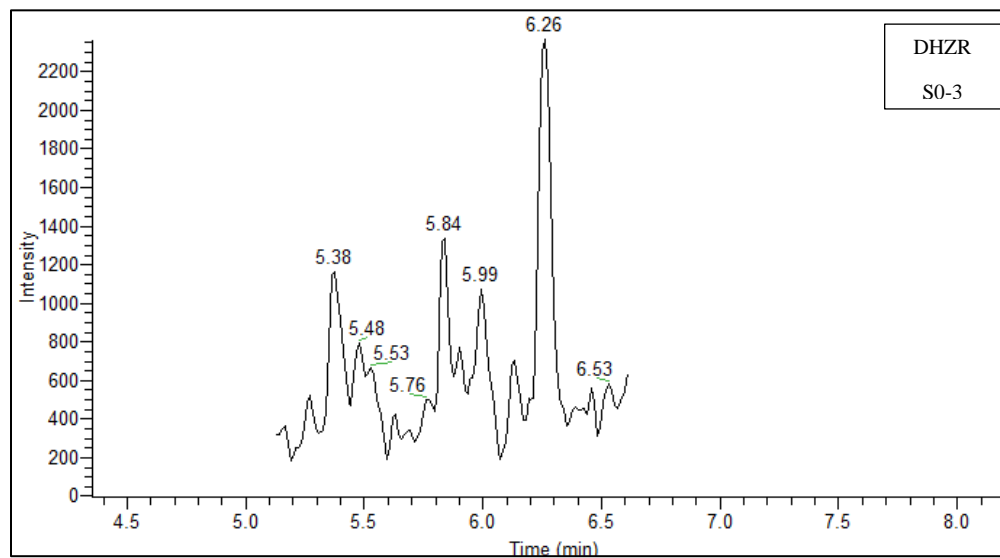

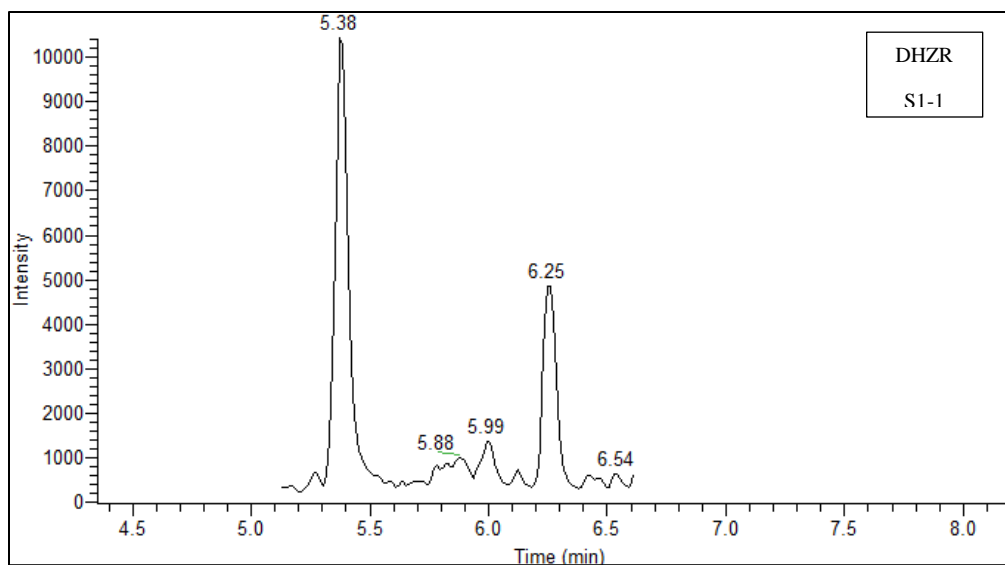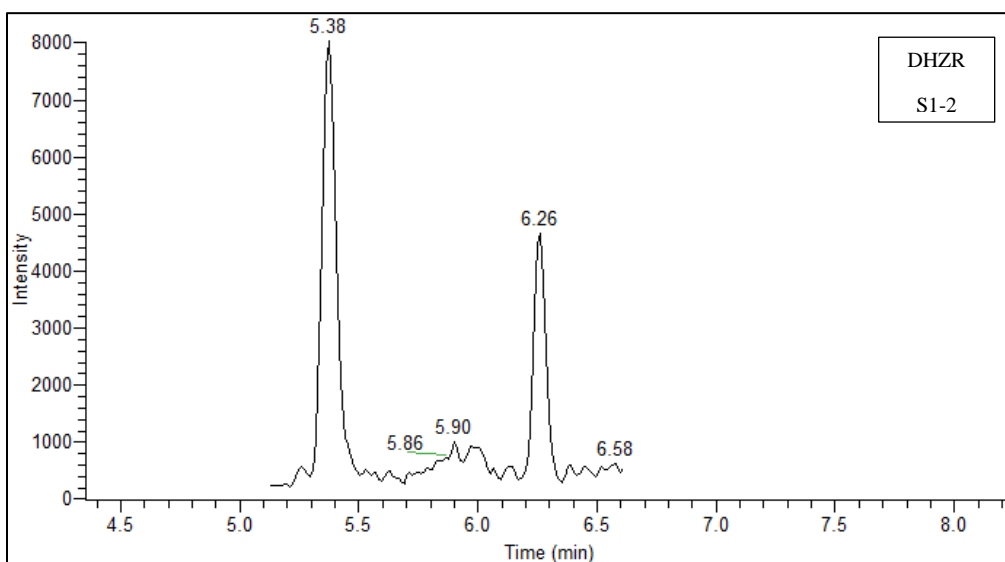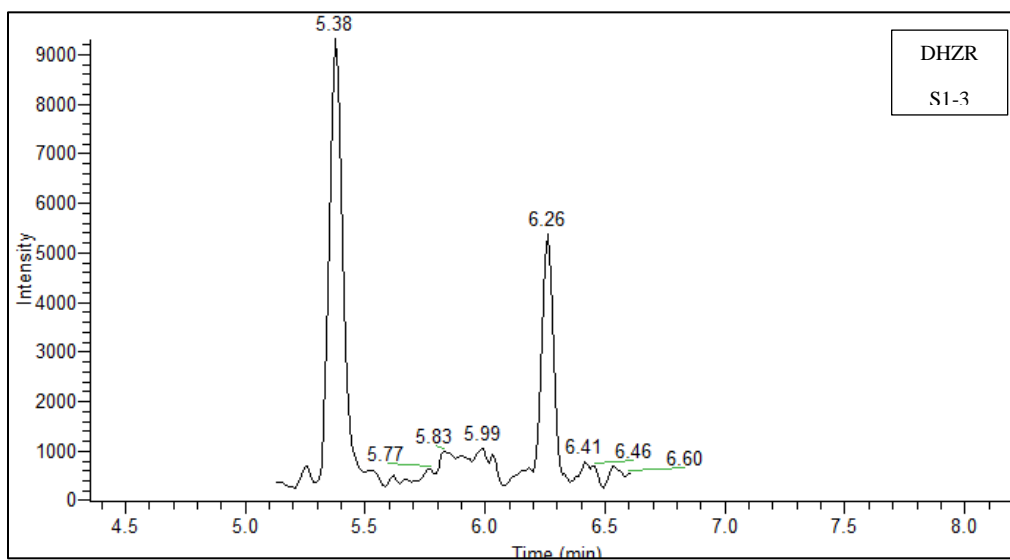

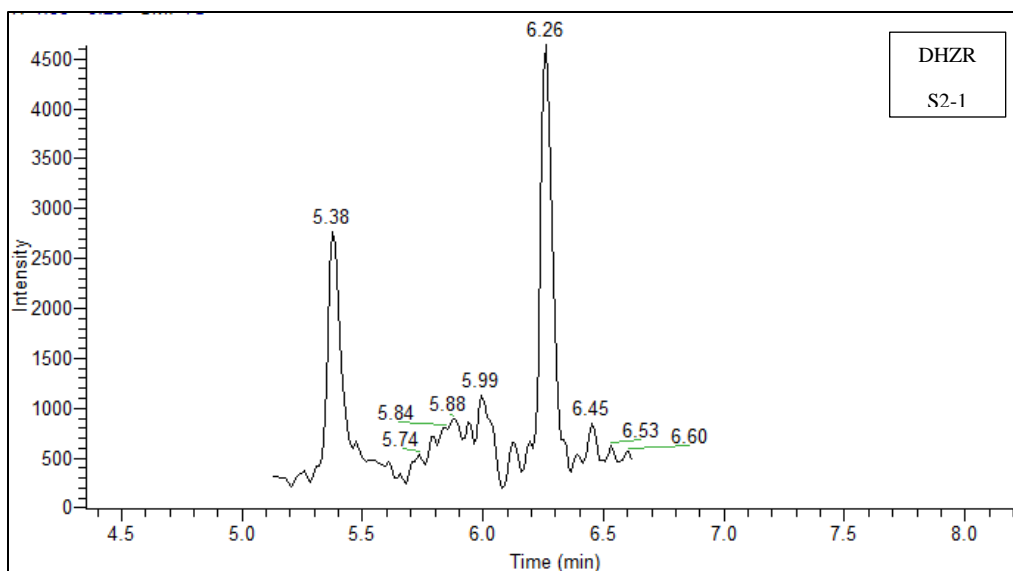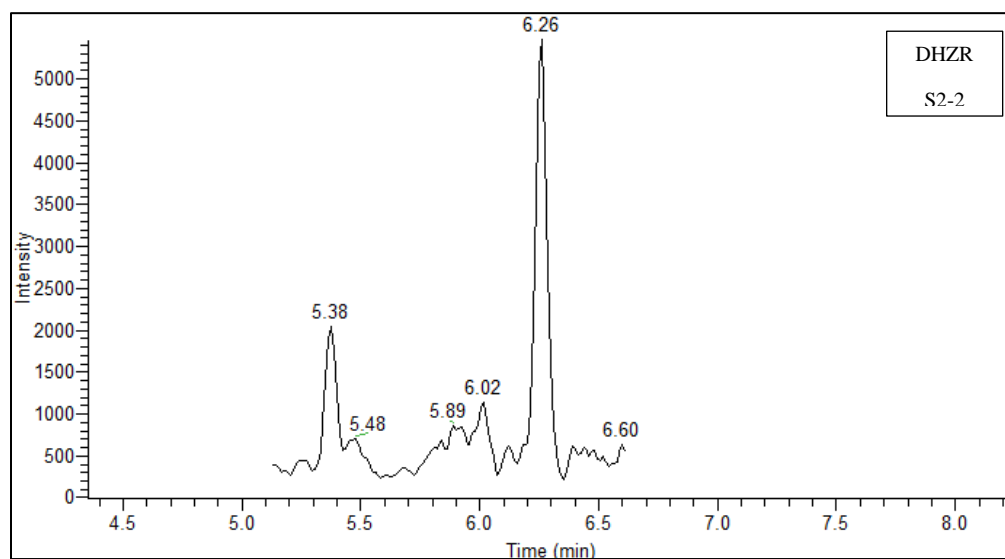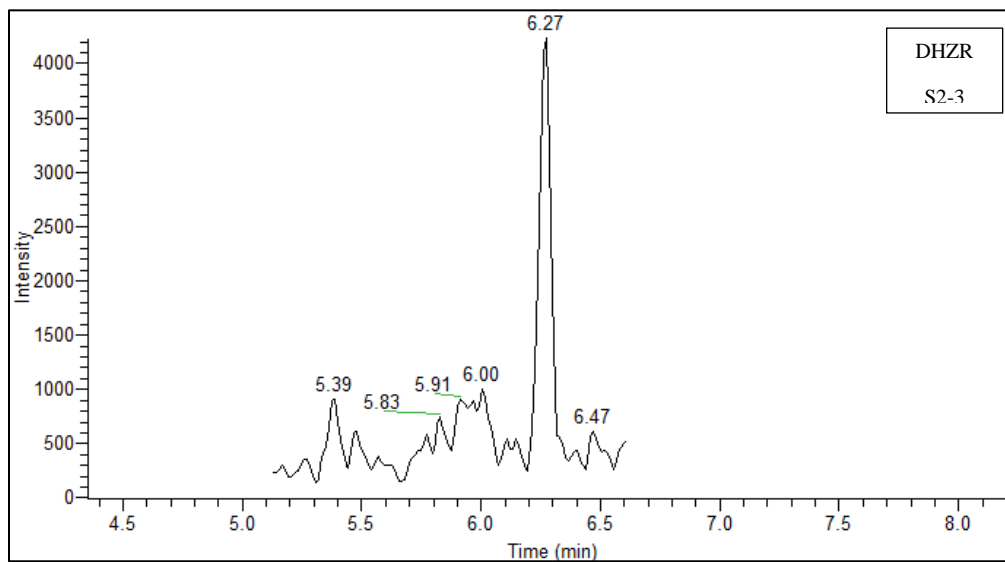

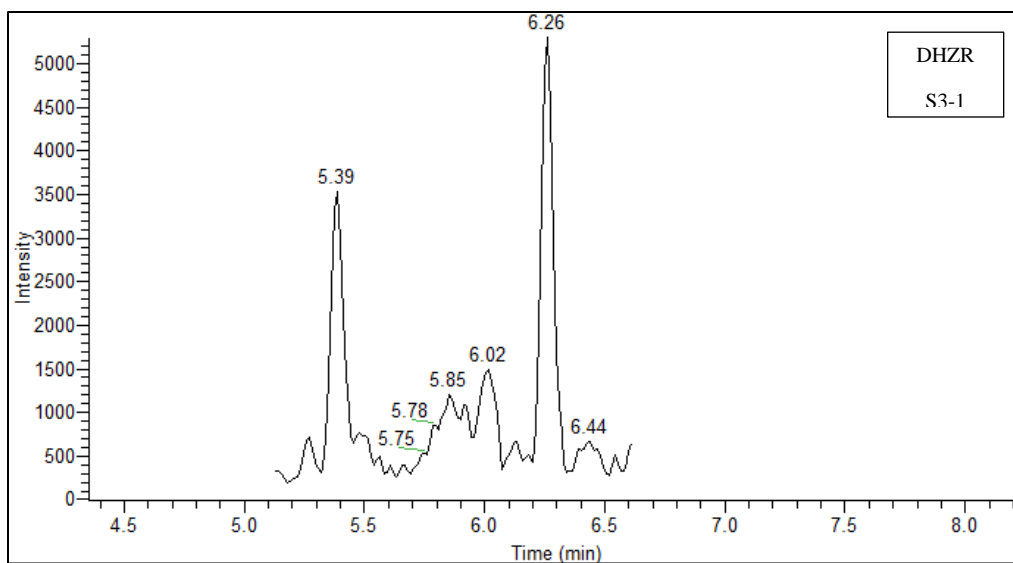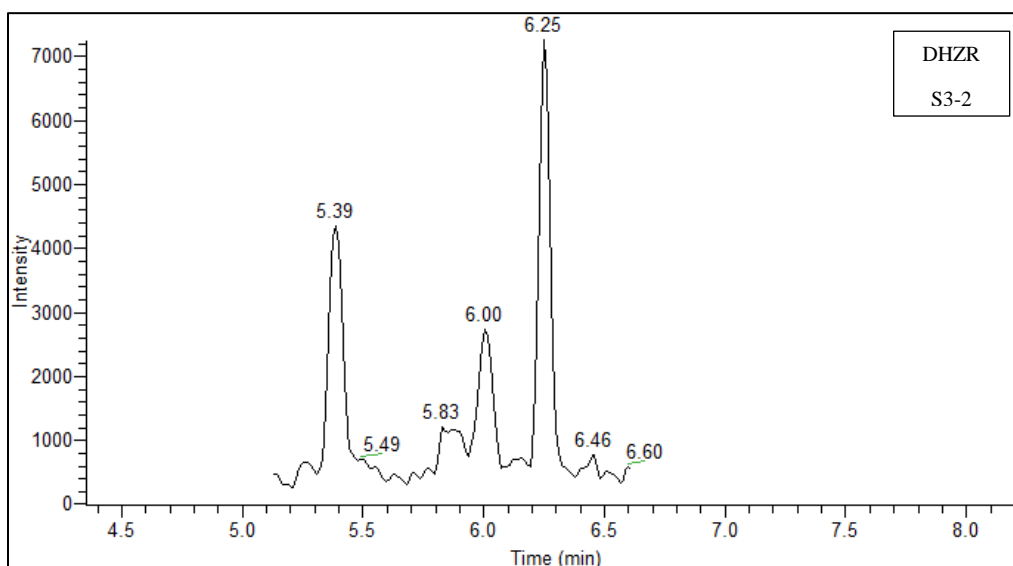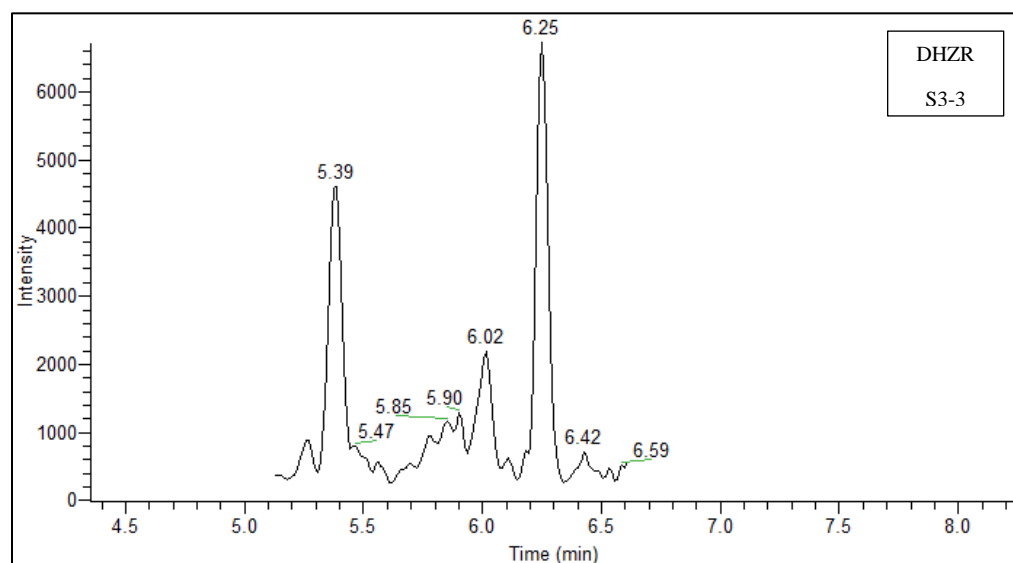



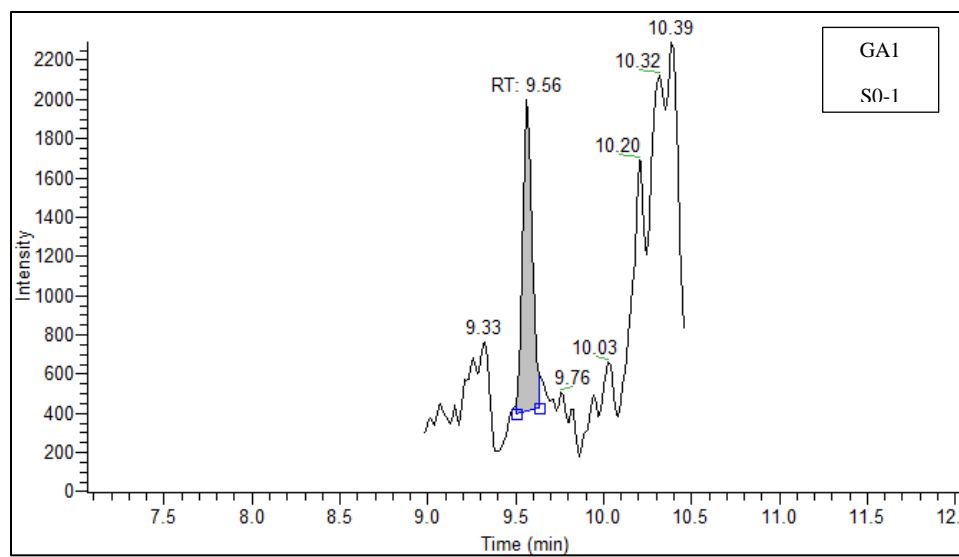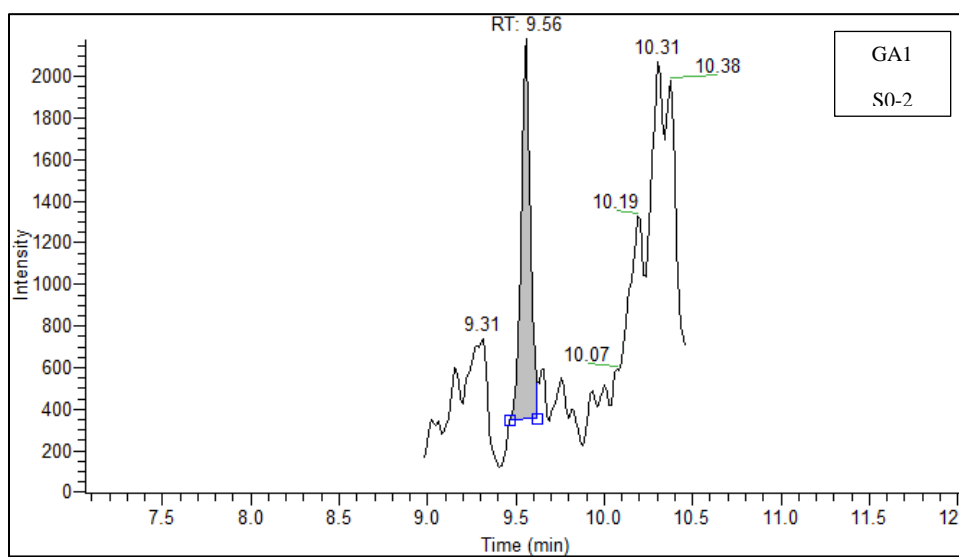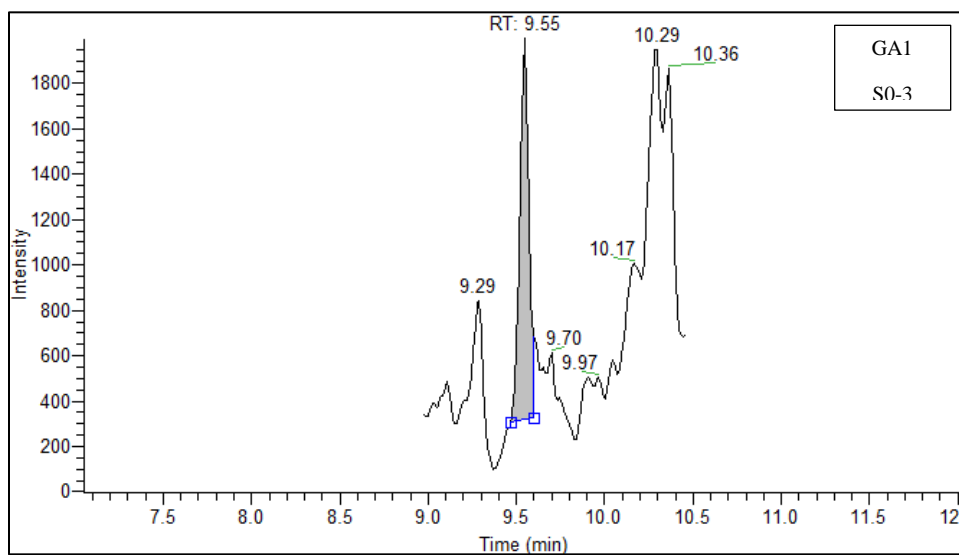

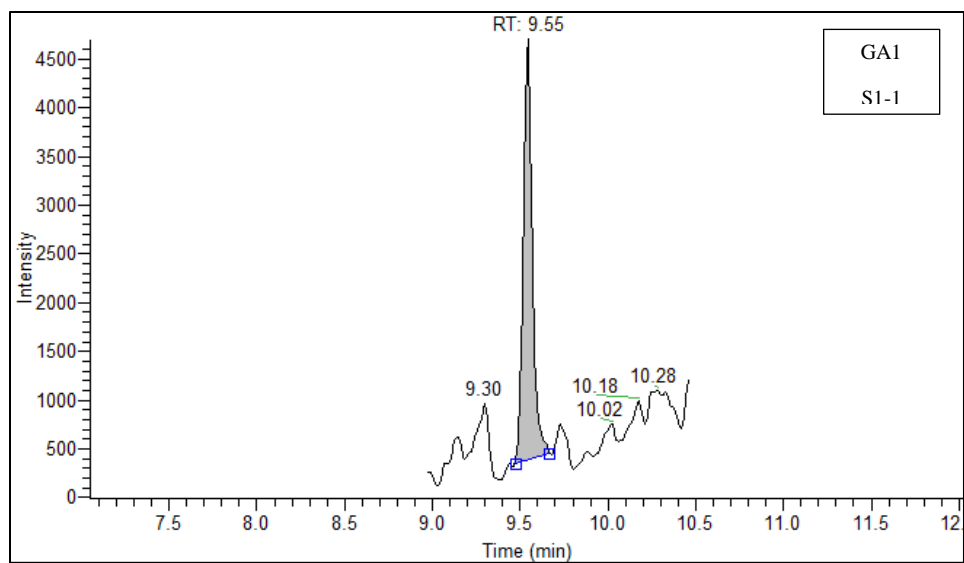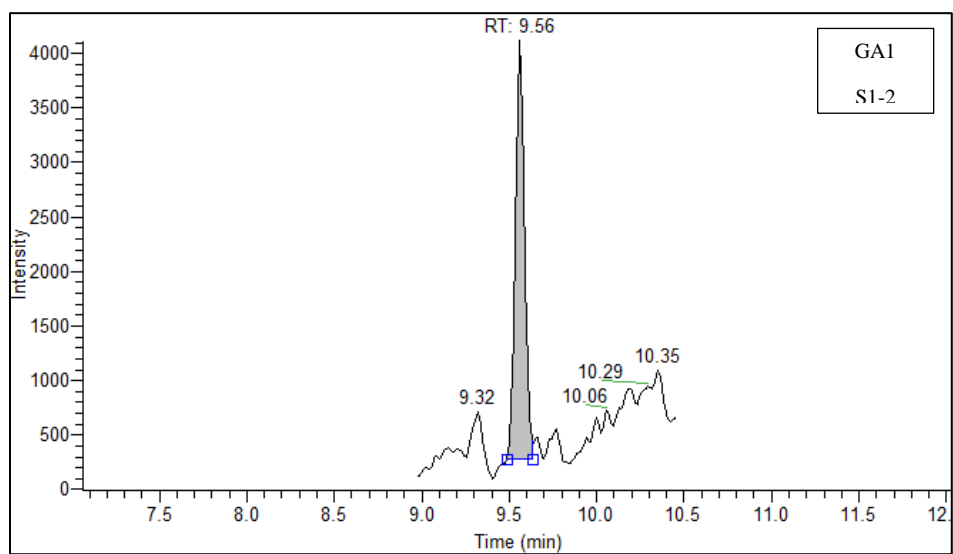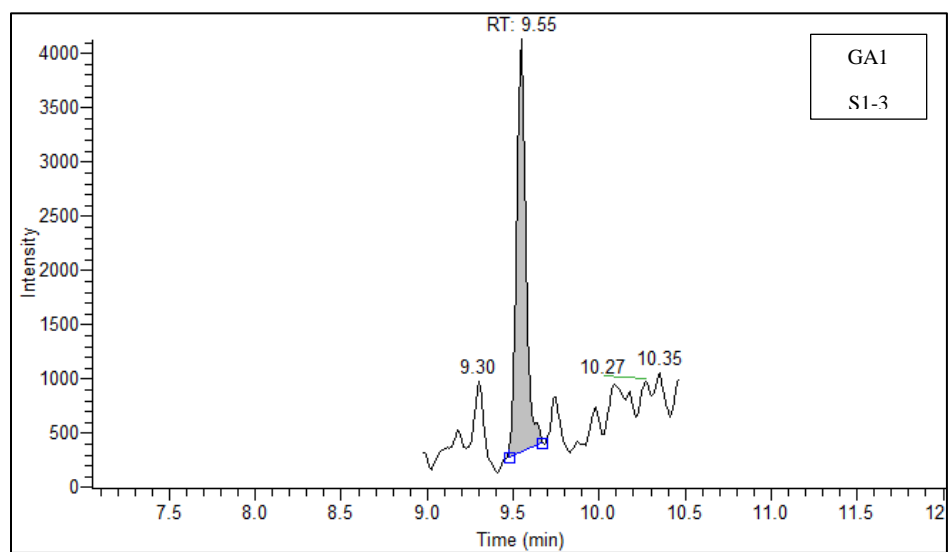

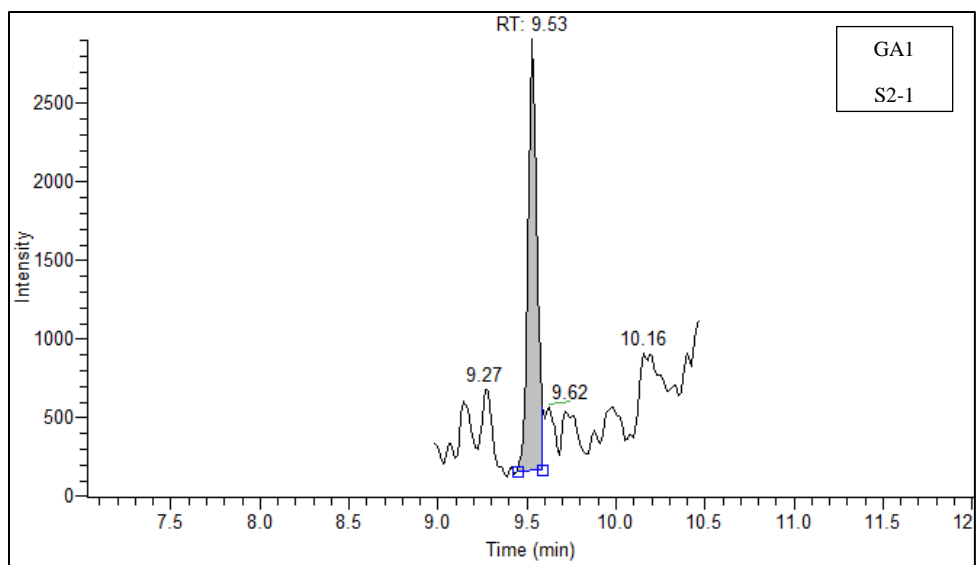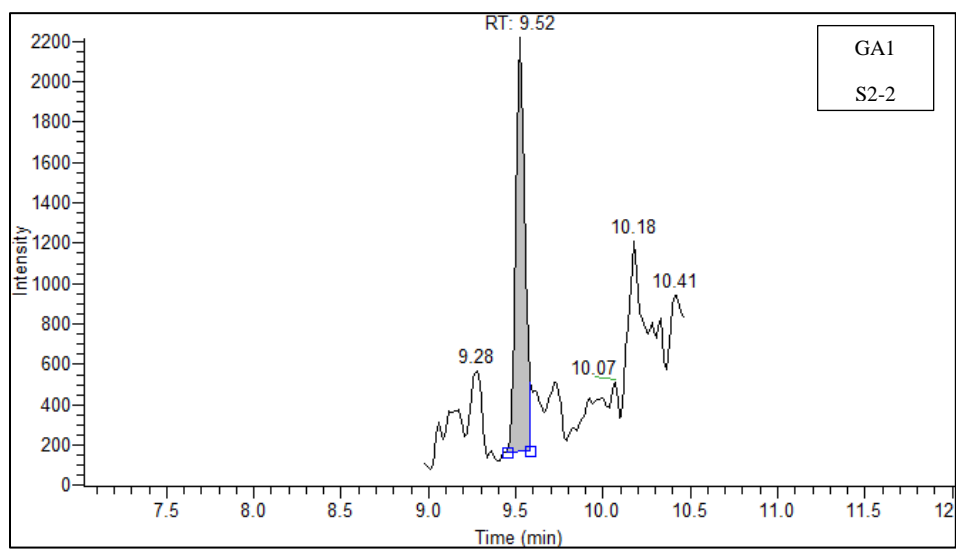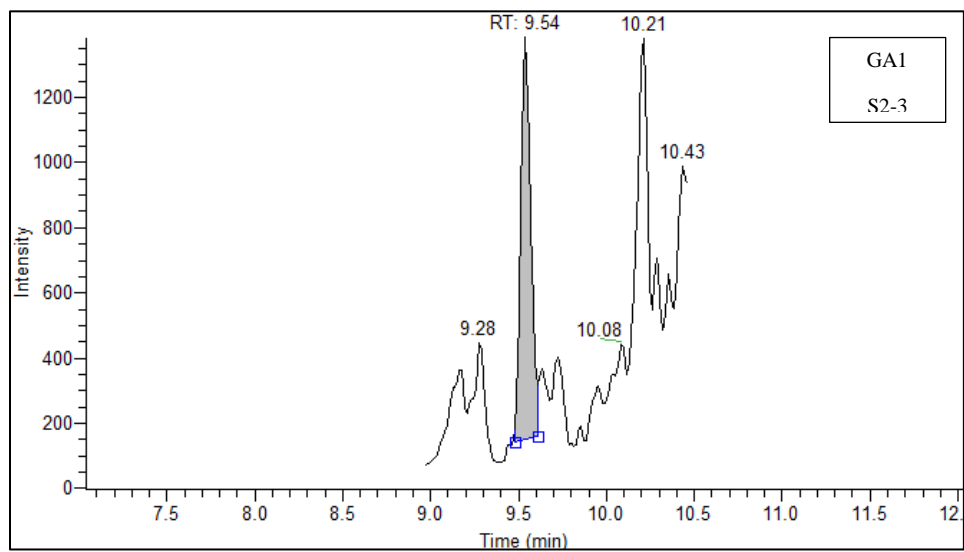

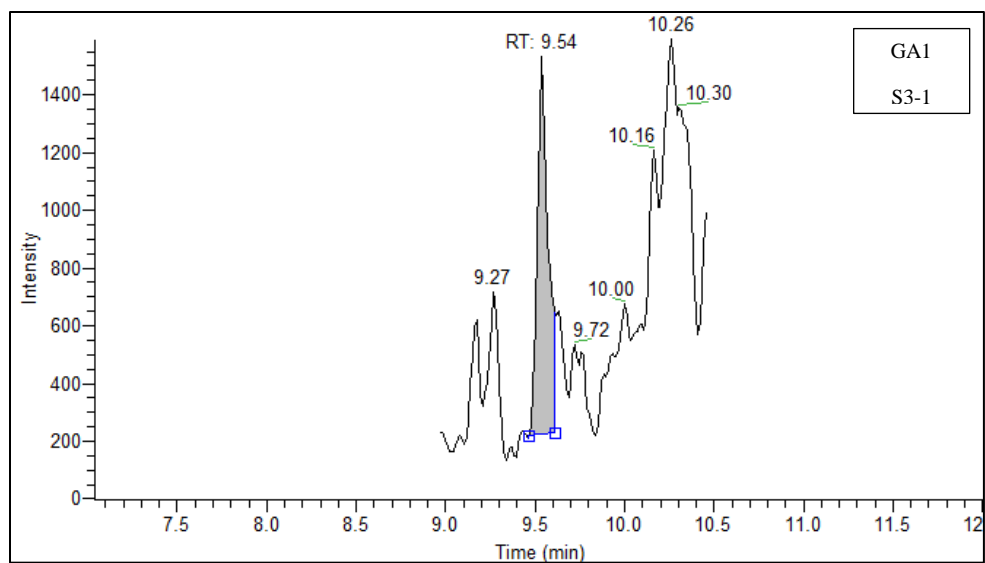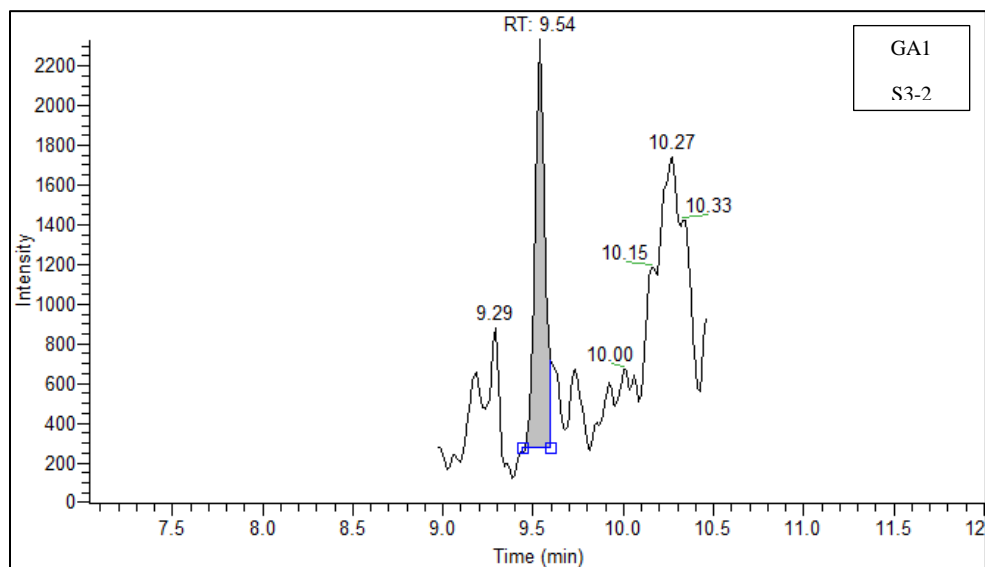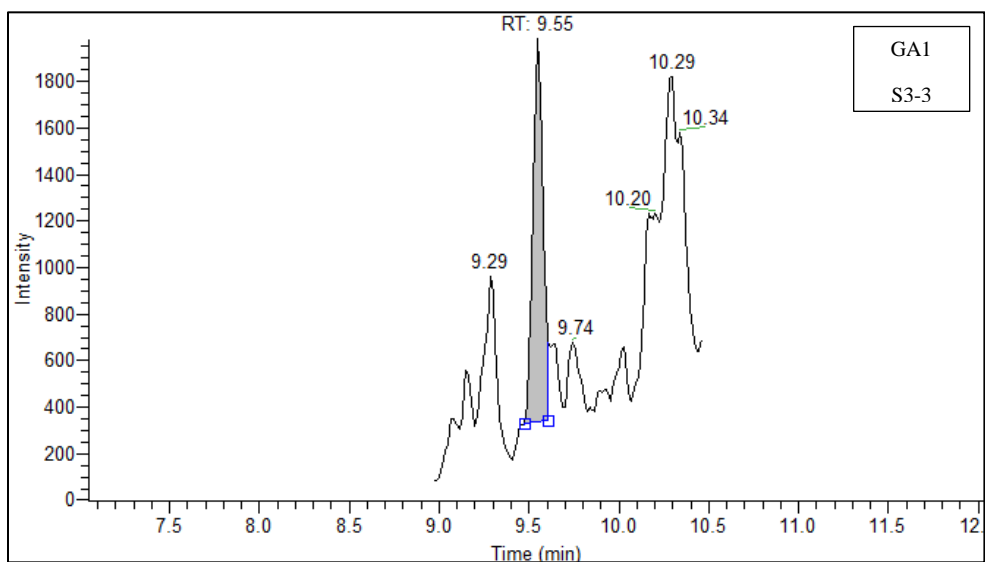

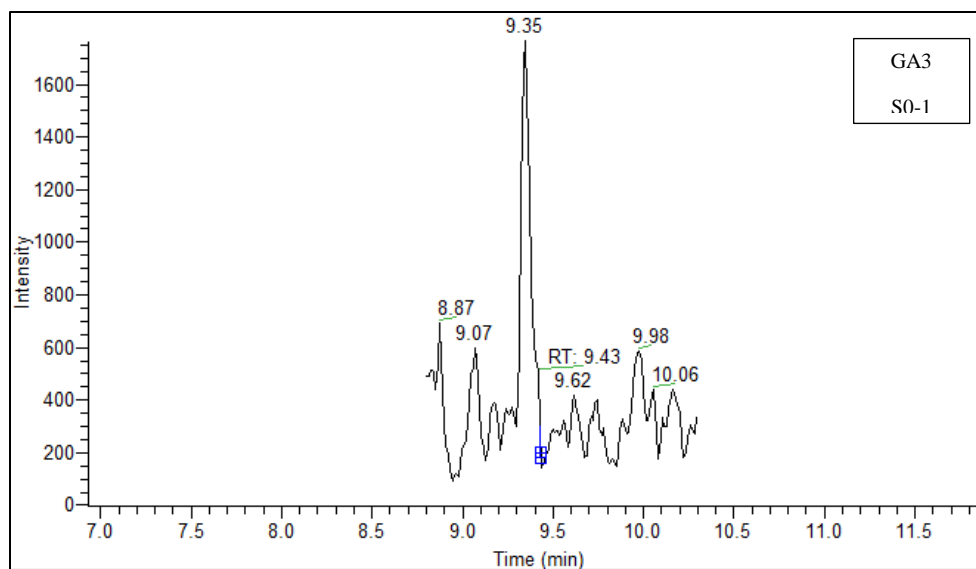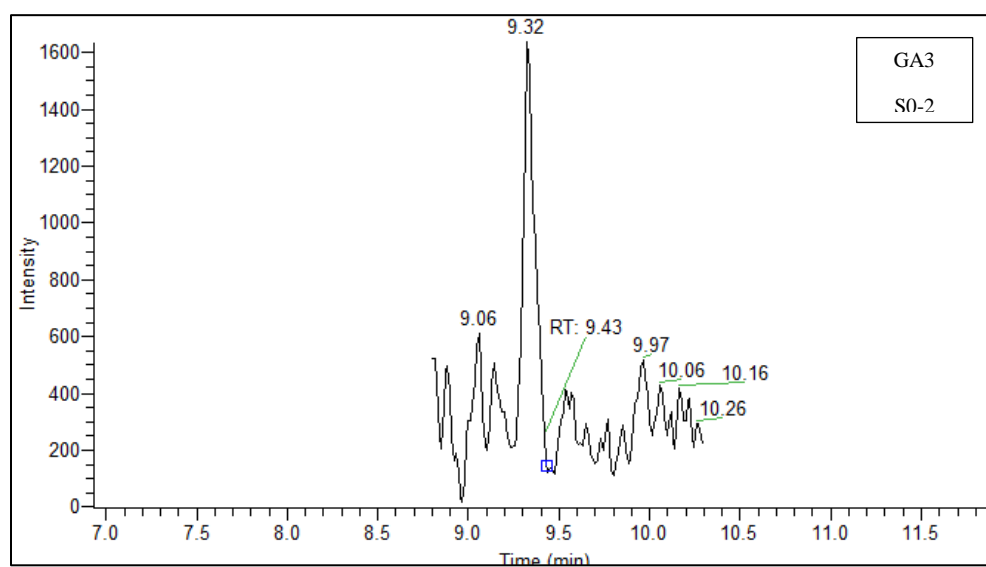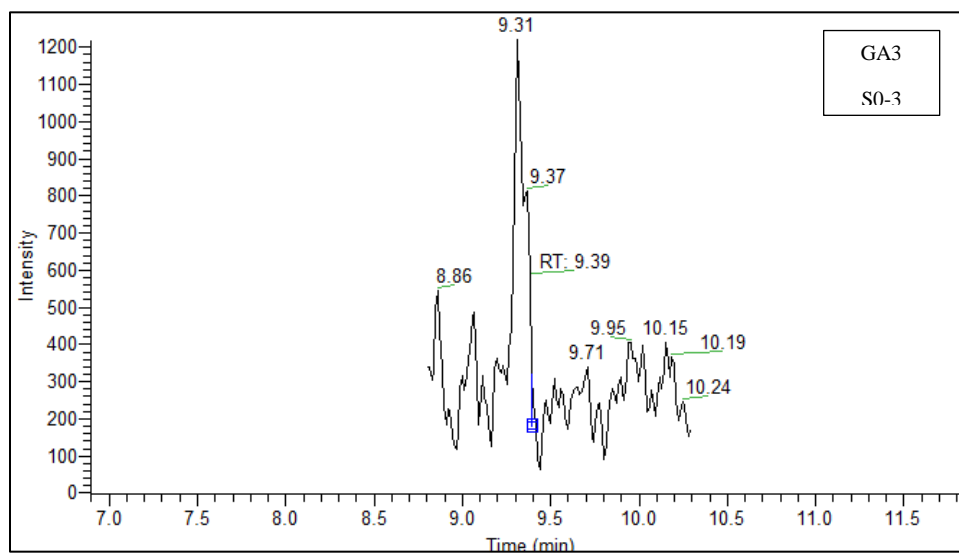

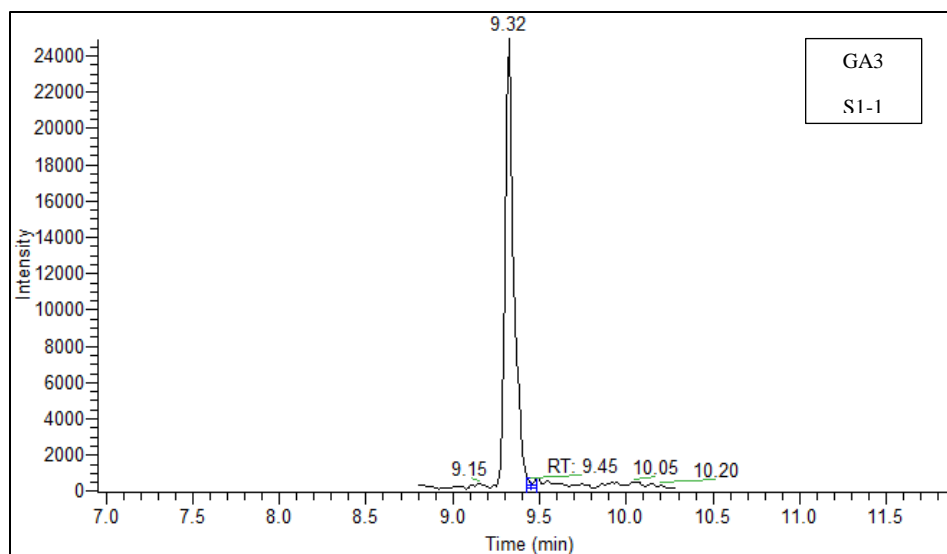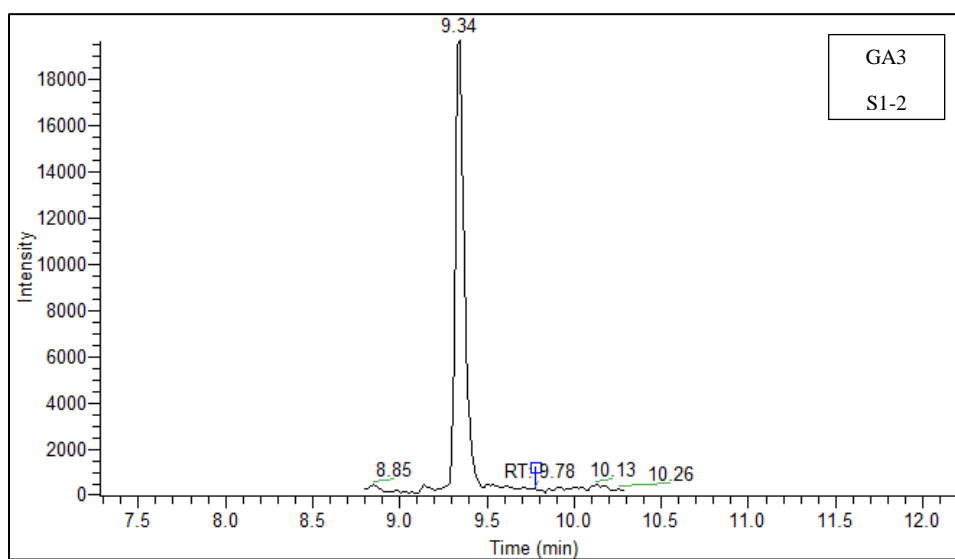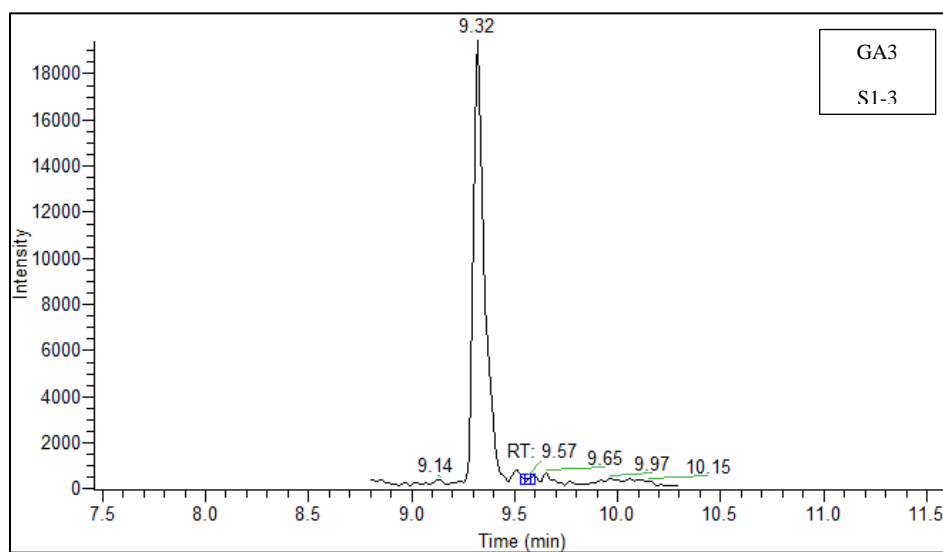

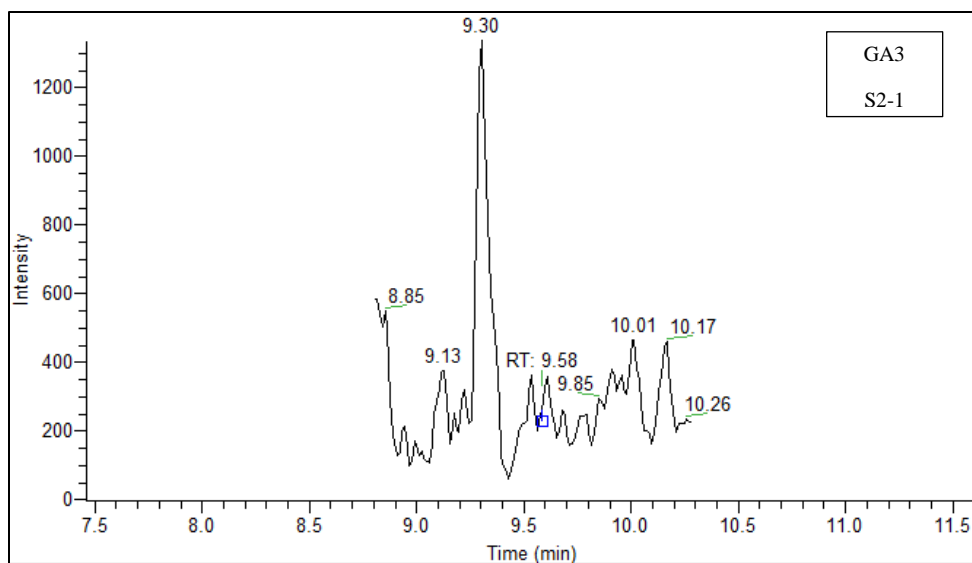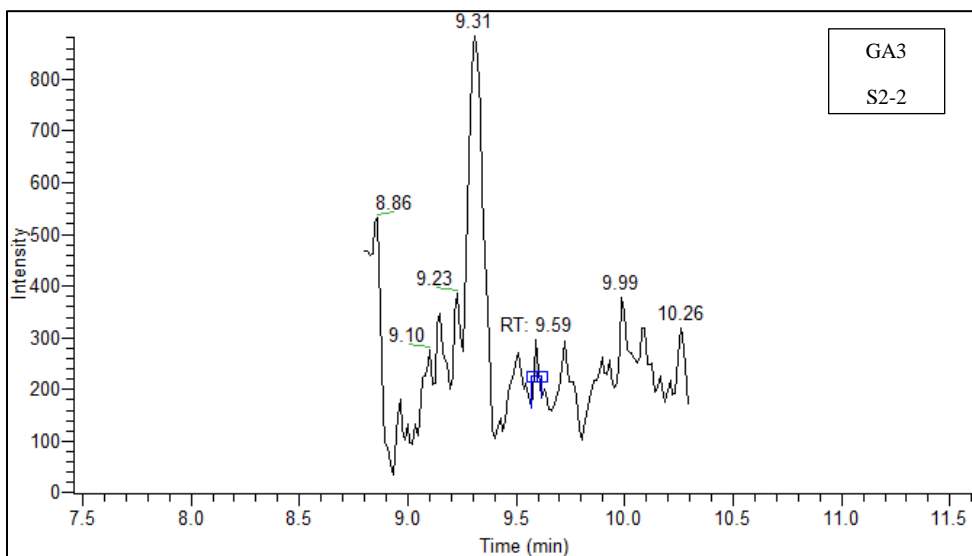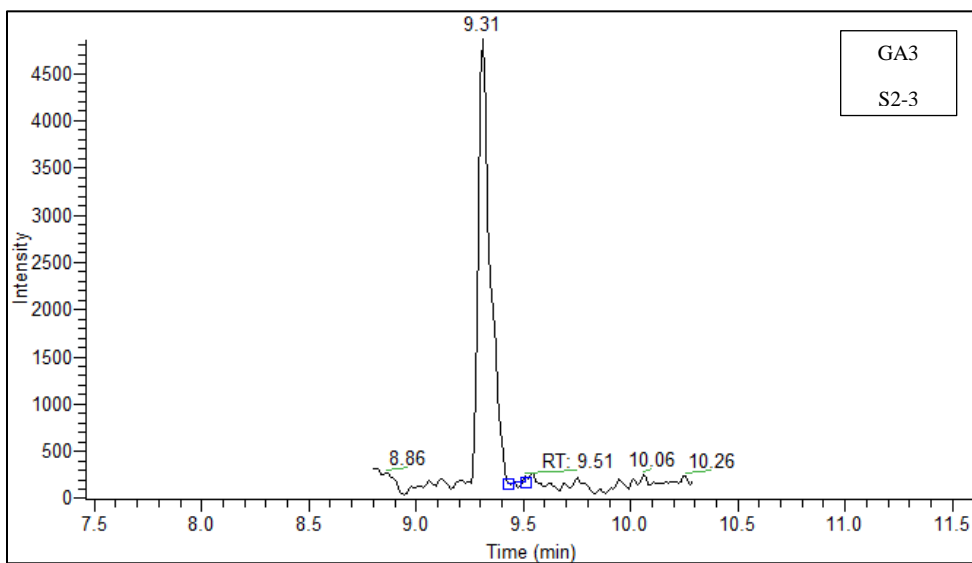

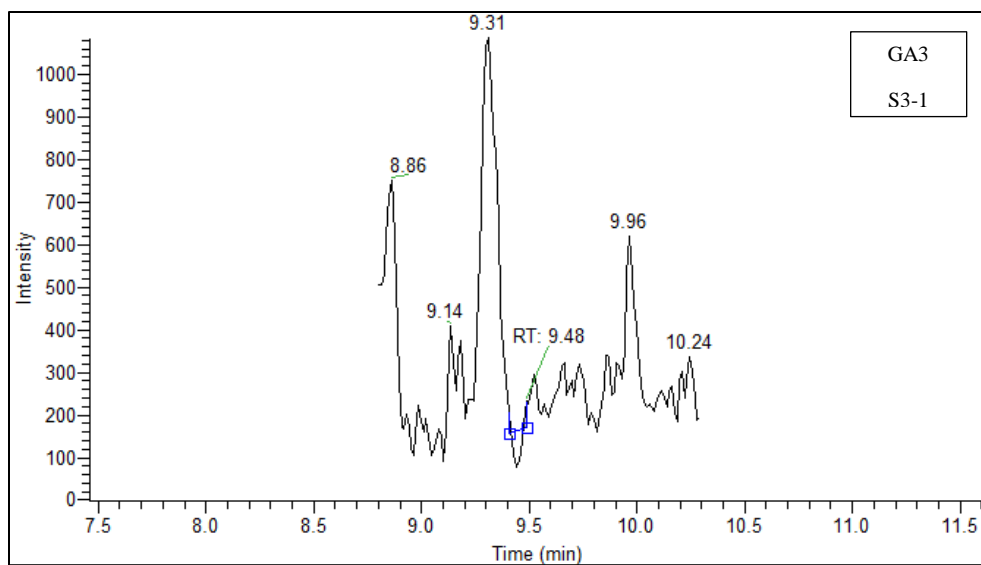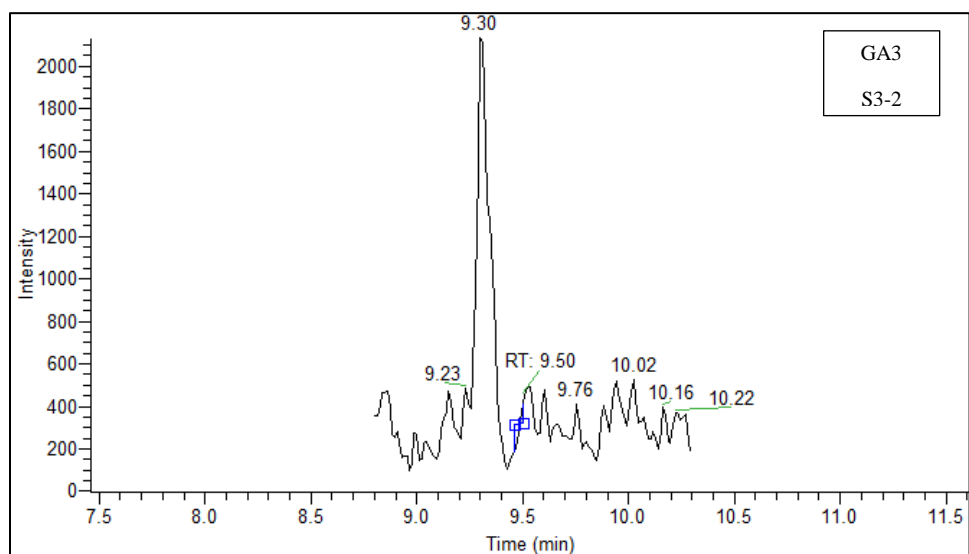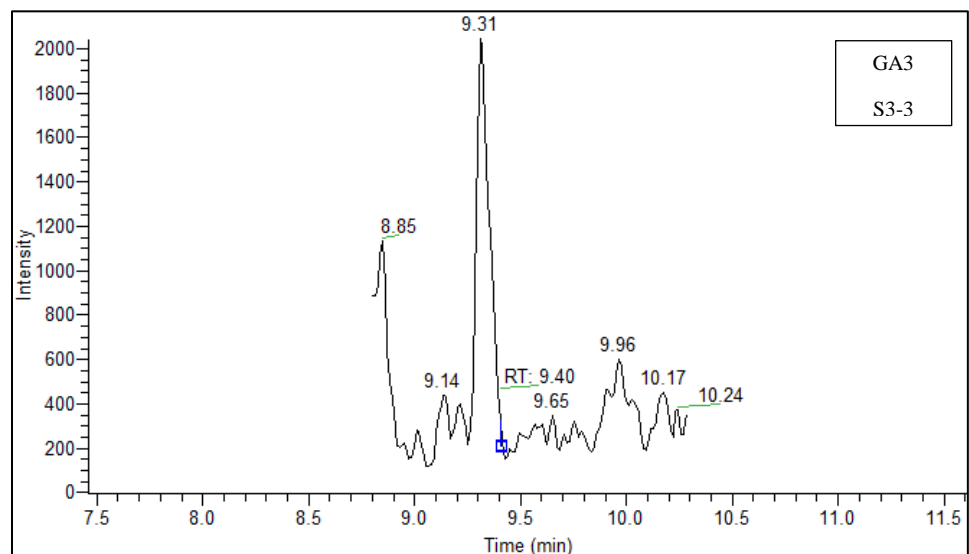



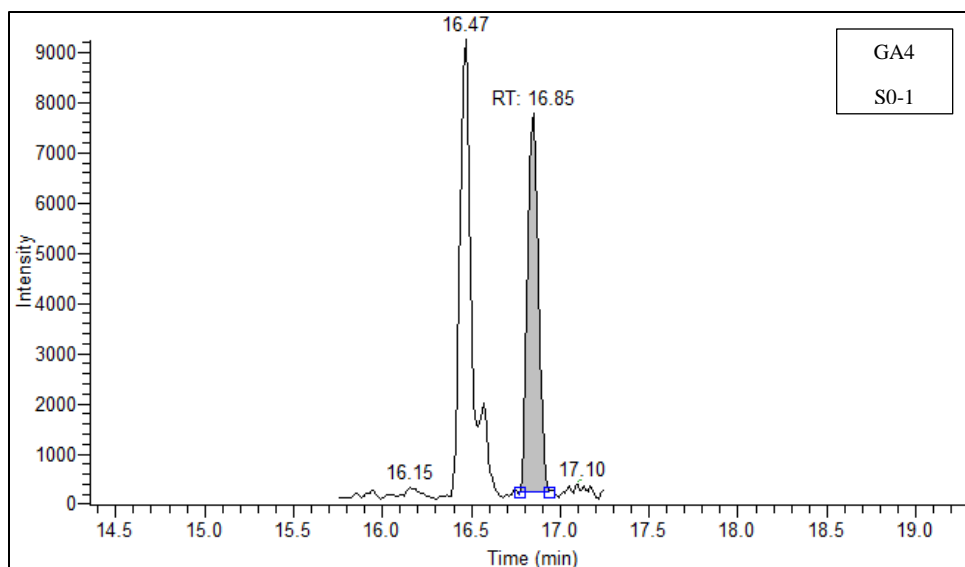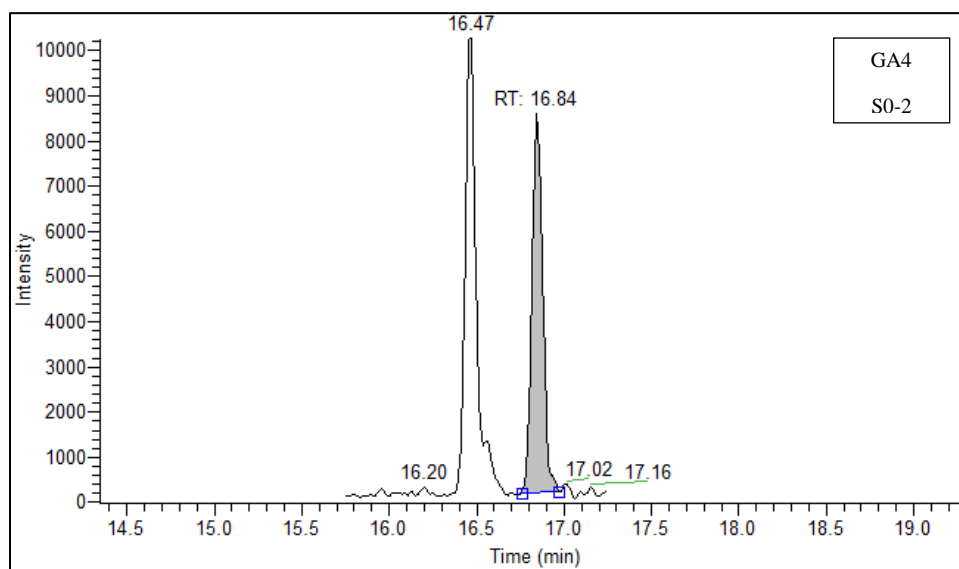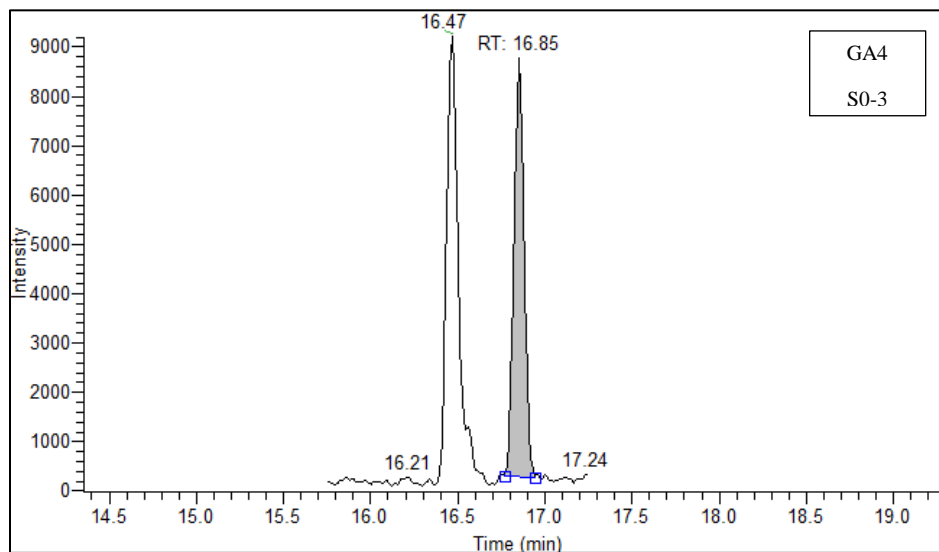

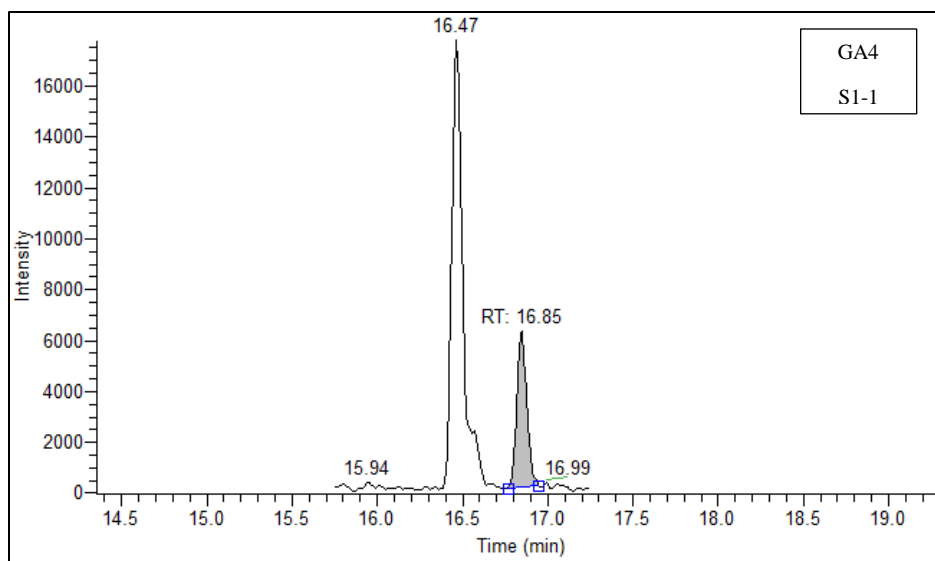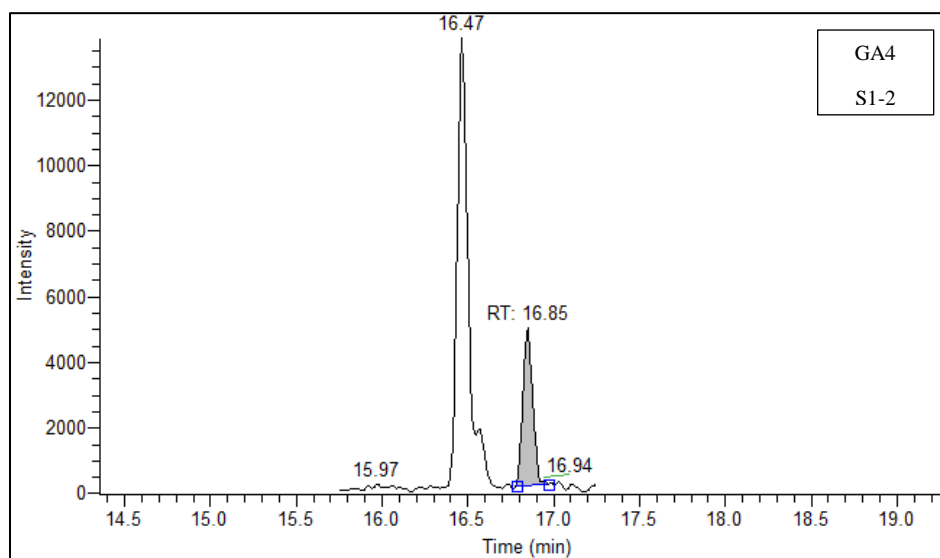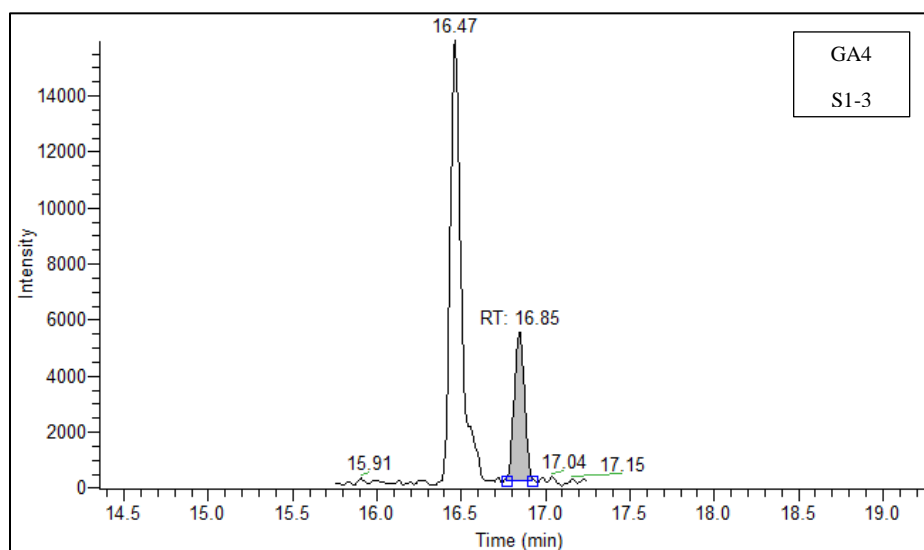

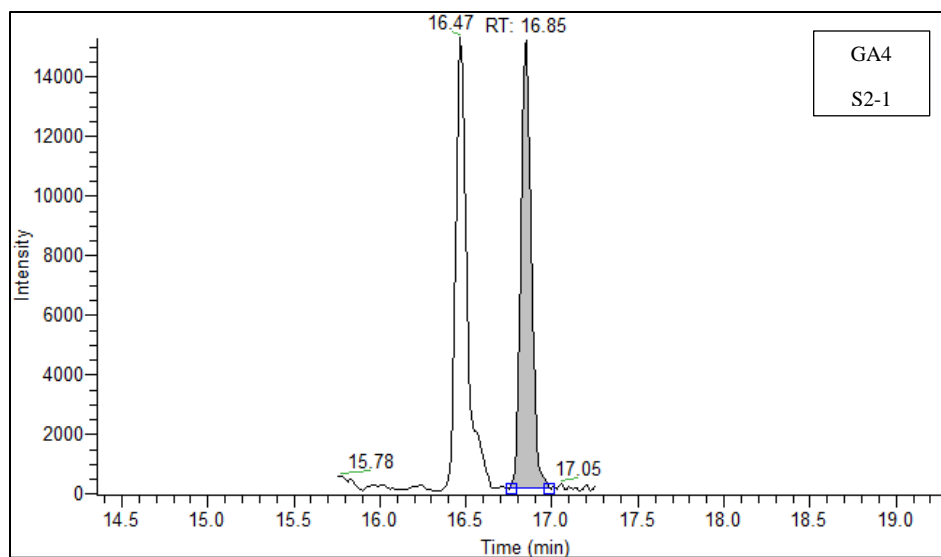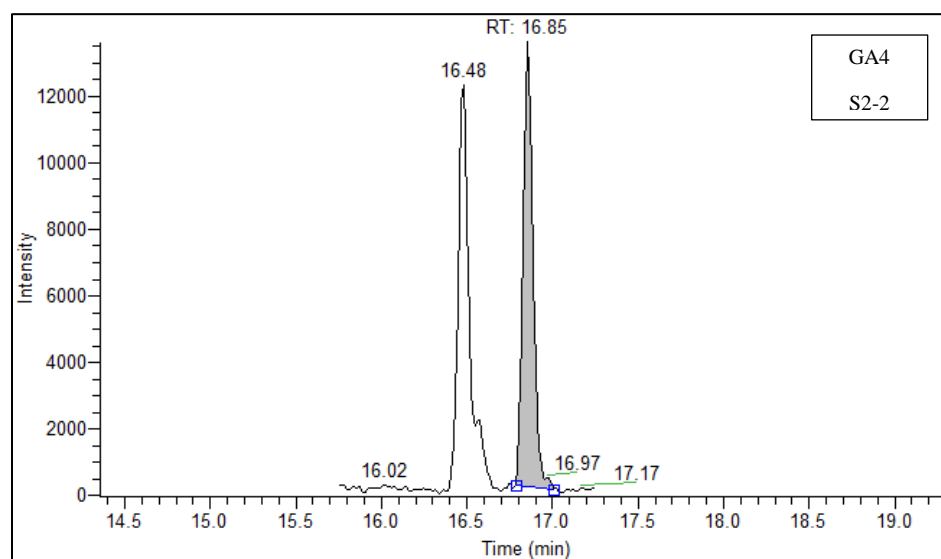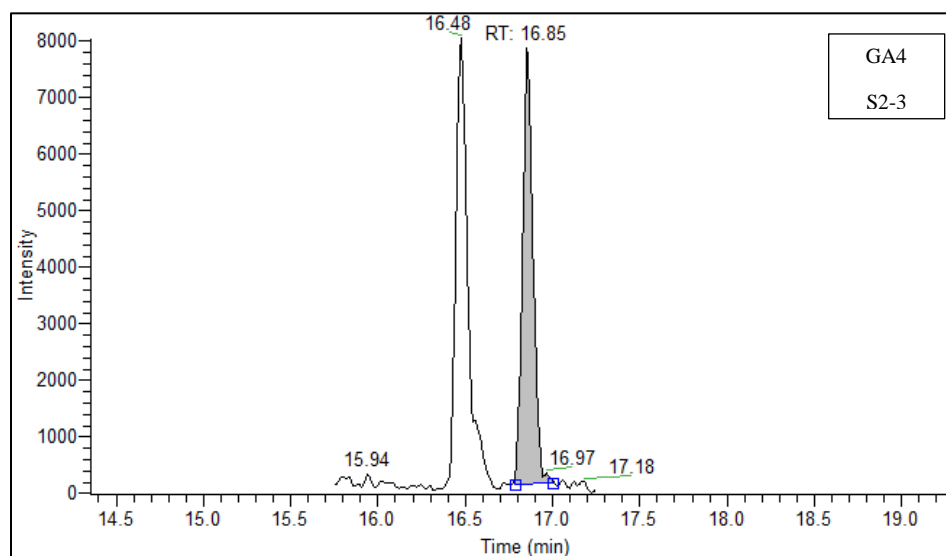

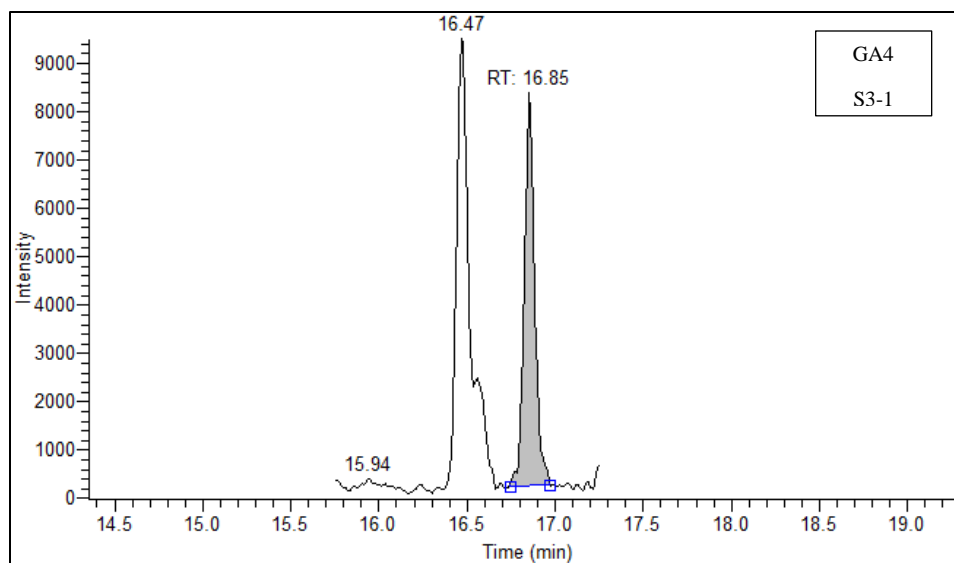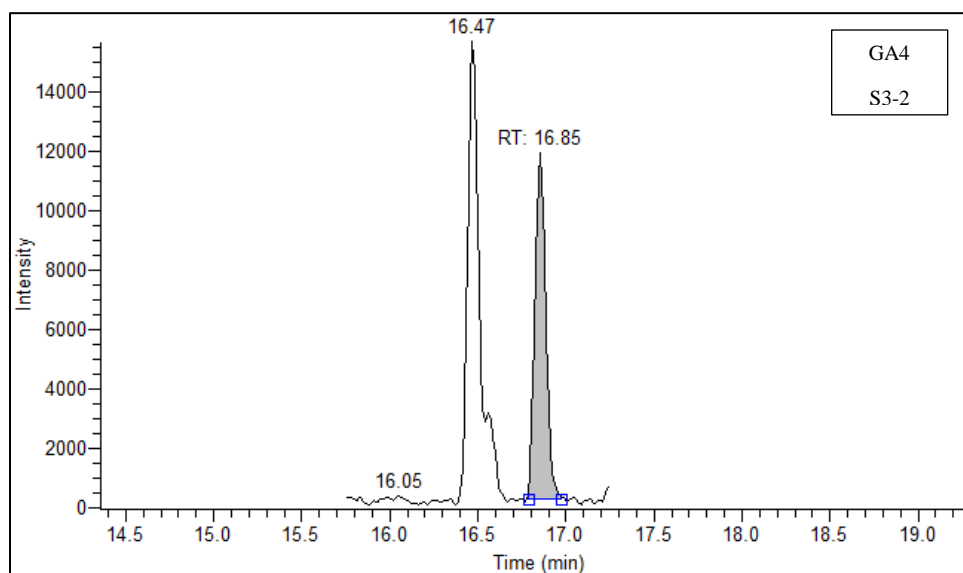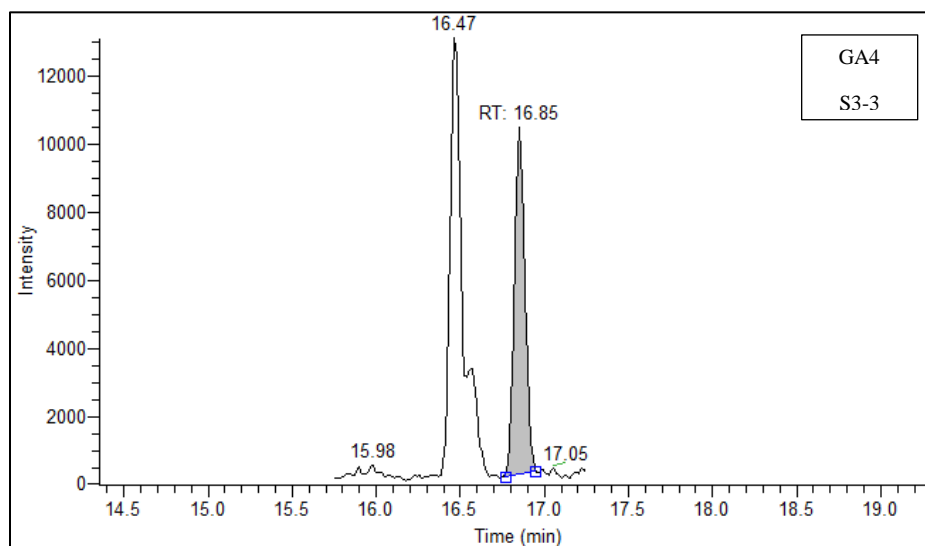

Supplement: s1 [file s1]
